# Supplementary material for: High-performance five-ring-fused organic semiconductors for field-effect transistors
Source: Royal Society of Chemistry journal article supplement (doi:10.1039/d1cs01136g), 2022-01-01
Supplement: d1cs01136g1.pdf [file d1cs01136g1.pdf]

*Supporting Information for*

## **High-Performance Five-Ring-Fused Organic Semiconductors for Field-Effect Transistors**

Hui Jiang,<sup>\*a</sup> Shengli Zhu,<sup>\*a</sup> Zhenduo Cui,<sup>a</sup> Zhaoyang Li,<sup>a</sup> Yanqin Liang,<sup>a</sup> Jiamin Zhu,<sup>a</sup> Peng Hu,<sup>b</sup> Haoli Zhang,<sup>\*c, d</sup> Wenping Hu,<sup>\*d, e</sup>

<sup>a.</sup> *School of Materials Science and Engineering, Tianjin University, 300072 China*

*E-mail: [h.jiang@tju.edu.cn](mailto:h.jiang@tju.edu.cn); [slzhu@tju.edu.cn](mailto:slzhu@tju.edu.cn)*

<sup>b.</sup> *School of Physics, Northwest University, Xi'an 710069, China*

<sup>c.</sup> *State Key Laboratory of Applied Organic Chemistry, Key Laboratory of Special Function Materials and Structure Design, College of Chemistry and Chemical Engineering, Lanzhou University, Lanzhou 730000, China*

*E-mail: [haoli.zhang@lzu.edu.cn](mailto:haoli.zhang@lzu.edu.cn)*

<sup>d.</sup> *Tianjin Key Laboratory of Molecular Optoelectronic Sciences, Department of Chemistry, School of Science, Tianjin University, Tianjin 300072, China*

*E-mail: [huwp@tju.edu.cn](mailto:huwp@tju.edu.cn)*

<sup>e.</sup> *Joint School of National University of Singapore and Tianjin University, International Campus of Tianjin University, Fuzhou 350207, China*

## Table of Contents

|                                                                                                                         |    |
|-------------------------------------------------------------------------------------------------------------------------|----|
| Table S1. The source data of Fig. 1 in the main text.....                                                               | 4  |
| Table S2. The performance statistics of five-ring-fused organic molecules listed in Fig. 3 of the main text..           | 6  |
| Table S3. The performance statistics of five-ring-fused organic molecules listed in Fig. 5 of the main text..           | 8  |
| Table S4. The performance statistics of five-ring-fused organic molecules listed in Fig. 6 of the main text..           | 9  |
| Table S5. The performance statistics of five-ring-fused organic molecules listed in Fig. 8 of the main text.            | 11 |
| Table S6. The performance statistics of five-ring-fused organic molecules listed in Fig. 10 of the main text.<br>.....  | 16 |
| Table S7. The performance statistics of five-ring-fused organic molecules listed in Fig. 11 of the main text.<br>.....  | 17 |
| Table S8. The performance statistics of five-ring-fused organic molecules listed in Fig. 13 of the main text.<br>.....  | 18 |
| Table S9. The performance statistics of five-ring-fused organic molecules listed in Fig. 15 of the main text.<br>.....  | 19 |
| Table S10. The performance statistics of five-ring-fused organic molecules listed in Fig. 16 of the main text.<br>..... | 20 |
| Table S11. The performance statistics of five-ring-fused organic molecules listed in Fig. 17 of the main text.<br>..... | 21 |
| Table S12. The performance statistics of five-ring-fused organic molecules listed in Fig. 19 of the main text.<br>..... | 22 |
| Table S13. The performance statistics of five-ring-fused organic molecules listed in Fig. 20 of the main text.<br>..... | 23 |
| Table S14. The performance statistics of five-ring-fused organic molecules listed in Fig. 21 of the main text.<br>..... | 24 |
| Table S15. The performance statistics of five-ring-fused organic molecules listed in Fig. 23 of the main text.<br>..... | 26 |
| Table S16. The performance statistics of five-ring-fused organic molecules listed in Fig. 24 of the main text.<br>..... | 27 |
| Table S17. The performance statistics of five-ring-fused organic molecules listed in Fig. 25 of the main text.<br>..... | 28 |
| Table S18. The performance statistics of five-ring-fused organic molecules listed in Fig. 26 of the main text.<br>..... | 29 |
| Table S19. The performance statistics of five-ring-fused organic molecules listed in Fig. 27 of the main text.<br>..... | 30 |
| Table S20. The performance statistics of five-ring-fused organic molecules listed in Fig. 28 of the main text.<br>..... | 31 |
| Table S21. The performance statistics of five-ring-fused organic molecules listed in Fig. 29 of the main text.<br>..... | 32 |
| Table S22. The performance statistics of five-ring-fused organic molecules listed in Fig. 31 of the main text.<br>..... | 33 |

|                                                                                                                |    |
|----------------------------------------------------------------------------------------------------------------|----|
| Table S23. The performance statistics of five-ring-fused organic molecules listed in Fig. 32 of the main text. | 34 |
| Table S24. The performance statistics of five-ring-fused organic molecules listed in Fig. 34 of the main text. | 35 |
| Table S25. The performance statistics of five-ring-fused organic molecules listed in Fig. 35 of the main text. | 36 |
| Table S26. The performance statistics of five-ring-fused organic molecules listed in Fig. 36 of the main text. | 37 |
| Table S27. The performance statistics of five-ring-fused organic molecules listed in Fig. 37 of the main text. | 38 |
| Table S28. The performance statistics of five-ring-fused organic molecules listed in Fig. 38 of the main text. | 39 |
| Table S29. The performance statistics of five-ring-fused organic molecules listed in Fig. 39 of the main text. | 40 |
| Table S30. The performance statistics of five-ring-fused organic molecules listed in Fig. 40 of the main text. | 41 |
| Table S31. The performance statistics of five-ring-fused organic molecules listed in Fig. 41 of the main text. | 42 |
| Table S32. The performance statistics of five-ring-fused organic molecules listed in Fig. 42 of the main text. | 43 |
| Table S33. The performance statistics of five-ring-fused organic molecules listed in Fig. 43 of the main text. | 44 |
| Table S34. The performance statistics of five-ring-fused organic molecules listed in Fig. 44 of the main text. | 45 |
| Reference                                                                                                      | 48 |

**Table S1. The source data of Fig. 1 in the main text.**

**Fig. 1a**

| Name                      | Method                           | Morphology            | Type                    | Mobility<br>(cm <sup>2</sup> V <sup>-1</sup> s <sup>-1</sup> ) | On/off                               | Reference |
|---------------------------|----------------------------------|-----------------------|-------------------------|----------------------------------------------------------------|--------------------------------------|-----------|
| Anthracene                | Physical Vapor Deposition        | Single Crystal        | p                       | 0.02                                                           | -                                    | 1         |
| Tetracene                 | Physical Vapor Deposition        | Single Crystal        | p                       | 0.15                                                           | 2 x 10 <sup>7</sup>                  | 2         |
|                           | Physical Vapor Deposition        | Single Crystal        | p                       | 0.4                                                            | -                                    | 3         |
|                           | <b>Physical Vapor Deposition</b> | <b>Single Crystal</b> | <b>p</b>                | <b>1</b>                                                       | -                                    | 4         |
|                           | <b>Physical Vapor Deposition</b> | <b>Single Crystal</b> | <b>p</b>                | <b>1.3</b>                                                     | -                                    | 5         |
|                           | Physical Vapor Deposition        | Single Crystal        | p                       | 0.2                                                            | 2.7 x 10 <sup>4</sup>                | 6         |
|                           | Physical Vapor Deposition        | Single Crystal        | p                       | 0.1                                                            | 10 <sup>9</sup>                      | 7         |
|                           | Physical Vapor Deposition        | Single Crystal        | p                       | 0.5                                                            | 5 x 10 <sup>5</sup>                  | 8         |
|                           | Physical Vapor Deposition        | Single Crystal        | p                       | 0.03                                                           | -                                    | 9         |
|                           | Physical Vapor Deposition        | Single Crystal        | p                       | 5 x 10 <sup>-4</sup>                                           | -                                    | 10        |
|                           | Physical Vapor Deposition        | Single Crystal        | p                       | 6 x 10 <sup>-5</sup>                                           | -                                    | 11        |
|                           | <b>Physical Vapor Deposition</b> | <b>Single Crystal</b> | <b>p</b>                | <b>2.4</b>                                                     | <b>10<sup>5</sup>-10<sup>8</sup></b> | 12        |
|                           | Physical Vapor Deposition        | Single Crystal        | Ambi<br>polar           | 0.16 (p)<br>0.037 (n)                                          | -                                    | 13        |
|                           | <b>Physical Vapor Deposition</b> | <b>Single Crystal</b> | <b>p</b>                | <b>1.6</b>                                                     | -                                    | 14        |
|                           | Physical Vapor Deposition        | Single Crystal        | p                       | 0.016                                                          | -                                    | 15        |
|                           | Physical Vapor Deposition        | Single Crystal        | p                       | 0.56                                                           | 10 <sup>5</sup>                      | 16        |
| Physical Vapor Deposition | Single Crystal                   | p                     | 6.38 x 10 <sup>-4</sup> | -                                                              | 17                                   |           |
| Vapor-Liquid-Solid        | Single Crystal                   | p                     | 0.3                     | -                                                              | 18                                   |           |
| Pentacene                 | Physical Vapor Deposition        | Single Crystal        | p                       | 0.3                                                            | 5 x 10 <sup>6</sup>                  | 19        |
|                           | Physical Vapor Deposition        | Single Crystal        | p                       | 0.3                                                            | -                                    | 2         |
|                           | Physical Vapor Deposition        | Single Crystal        | p                       | 0.5                                                            | -                                    | 20        |
|                           | <b>Physical Vapor Deposition</b> | <b>Single Crystal</b> | <b>p</b>                | <b>1.4</b>                                                     | -                                    | 5         |
|                           | <b>Physical Vapor Deposition</b> | <b>Single Crystal</b> | <b>p</b>                | <b>35</b>                                                      | -                                    | 21        |
|                           | Physical Vapor Deposition        | Single Crystal        | p                       | 0.4                                                            | -                                    | 22        |
|                           | Physical Vapor Deposition        | Single Crystal        | p                       | 0.2                                                            | -                                    | 23        |
|                           | Physical Vapor Deposition        | Single Crystal        | p                       | 0.2                                                            | -                                    | 6         |
|                           | <b>Vacuum Deposition</b>         | <b>Single Grain</b>   | <b>p</b>                | <b>2</b>                                                       | -                                    | 24        |
|                           | <b>Physical Vapor Deposition</b> | <b>Single Crystal</b> | <b>p</b>                | <b>2.2</b>                                                     | -                                    | 25        |
|                           | Physical Vapor Deposition        | Single Crystal        | p                       | 0.3                                                            | 10 <sup>5</sup>                      | 26        |
|                           | <b>Physical Vapor Deposition</b> | <b>Single Crystal</b> | <b>p</b>                | <b>2.3</b>                                                     | -                                    | 27        |
|                           | <b>Physical Vapor Deposition</b> | <b>Single Crystal</b> | <b>p</b>                | <b>1.9</b>                                                     | <b>10<sup>3</sup>-10<sup>4</sup></b> | 12        |
|                           | Physical Vapor Deposition        | Single Crystal        | p                       | 0.35                                                           | -                                    | 9         |
|                           | <b>Vacuum Deposition</b>         | <b>Single Grain</b>   | <b>p</b>                | <b>1.1</b>                                                     | <b>10<sup>5</sup></b>                | 28        |
|                           | <b>Physical Vapor Deposition</b> | <b>Single Crystal</b> | <b>p</b>                | <b>40</b>                                                      | -                                    | 29        |
|                           | Physical Vapor Deposition        | Single Crystal        | p                       | 0.4                                                            | 10 <sup>6</sup>                      | 30        |
|                           | Physical Vapor Deposition        | Single Crystal        | Ambi<br>polar           | 0.29 (p)<br>0.35 (n)                                           | -                                    | 31        |
| Drop Cast                 | Single Crystal                   | p                     | 0.6                     | -                                                              | 32                                   |           |

|          |                                        |                       |          |                                 |                                                            |           |
|----------|----------------------------------------|-----------------------|----------|---------------------------------|------------------------------------------------------------|-----------|
|          | Vacuum Deposition                      | Single Grain          | p        | 0.39                            | $10^6$                                                     | 33        |
|          | Physical Vapor Deposition              | Single Crystal        | p        | 0.7                             | -                                                          | 34        |
|          | <b>Physical Vapor Deposition</b>       | <b>Single Crystal</b> | <b>p</b> | <b>2</b>                        | -                                                          | <b>35</b> |
|          | <b>Flux-Mediated Vacuum Deposition</b> | <b>Single Crystal</b> | <b>p</b> | <b>5</b>                        | <b><math>10^4</math></b>                                   | <b>36</b> |
| Hexacene | <b>Physical Vapor Deposition</b>       | <b>Single Crystal</b> | <b>p</b> | <b>4.28 (max)</b><br>0.88 (ave) | <b><math>10^5</math> (max)</b><br>$10^4$ - $10^6$<br>(ave) | <b>37</b> |

**Fig. 1b**

| Name         | Method                           | Morphology            | Type     | Mobility<br>( $\text{cm}^2 \text{V}^{-1} \text{s}^{-1}$ ) | On/off                        | Reference |
|--------------|----------------------------------|-----------------------|----------|-----------------------------------------------------------|-------------------------------|-----------|
| phenanthrene | Bridgeman                        | Single Crystal        | p        | 0.21                                                      | -                             | 38        |
|              | Bridgeman                        | Single Crystal        | p        | 0.15                                                      | -                             | 38        |
|              | Bridgeman                        | Single Crystal        | p        | 0.63                                                      | -                             | 38        |
|              | Bridgeman                        | Single Crystal        | p        | 0.52                                                      | -                             | 38        |
|              | -                                | Single Crystal        | p        | 0.26                                                      | -                             | 39        |
|              | -                                | <b>Single Crystal</b> | <b>p</b> | <b>2.86</b>                                               | -                             | <b>39</b> |
| Chrysene     | -                                | Single Crystal        | p        | 0.23                                                      | -                             | 39        |
|              | -                                | Single Crystal        | p        | 2.3                                                       | -                             | 39        |
| Picene       | <b>Physical Vapor Deposition</b> | <b>Single Crystal</b> | <b>p</b> | <b>1.3</b>                                                | <b><math>\sim 10^4</math></b> | <b>40</b> |
|              | <b>Physical Vapor Deposition</b> | <b>Single Crystal</b> | <b>p</b> | <b>9</b>                                                  | -                             | <b>41</b> |
|              | -                                | Single Crystal        | p        | 0.64                                                      | -                             | 39        |
|              | -                                | <b>Single Crystal</b> | <b>p</b> | <b>4.74</b>                                               | -                             | <b>39</b> |
| [6]phenacene | -                                | Single Crystal        | p        | 0.56                                                      | -                             | 42        |

**Table S2. The performance statistics of five-ring-fused organic molecules listed in Fig. 3 of the main text.**

| Number     | Method                         | Morphology                       | Type           | Mobility (cm <sup>2</sup> V <sup>-1</sup> s <sup>-1</sup> ) | On/off                                                 | Reference |
|------------|--------------------------------|----------------------------------|----------------|-------------------------------------------------------------|--------------------------------------------------------|-----------|
| 001        | -                              | -                                | -              | -                                                           | -                                                      | 43        |
| 002        | Vacuum Deposition              | Thin Films                       | p              | 1.2 x 10 <sup>-2</sup>                                      | 10 <sup>3</sup>                                        | 44        |
| 003        | -                              | -                                | -              | -                                                           | -                                                      | 45        |
| 004        | -                              | -                                | p <sup>a</sup> | 1.1 x 10 <sup>-4</sup>                                      | 10 <sup>5</sup>                                        | 46        |
| 005        | Solvent Exchange               | Single Crystal                   | Ambipolar      | 7 x 10 <sup>-4</sup> (p);<br>3 x 10 <sup>-3</sup> (n)       |                                                        | 47        |
| 006        | <b>Drop Cast</b>               | <b>Single Crystals (α Phase)</b> | <b>p</b>       | <b>1.44</b>                                                 | <b>&gt;10<sup>3</sup></b>                              | 48        |
|            | Drop Cast                      | Single Crystals (β Phase)        | p              | 0.28                                                        | >10 <sup>3</sup>                                       | 48        |
| 007        | Spin Coating                   | Thin Films                       | n              | 0.10-0.16                                                   | 10 <sup>7</sup> -10 <sup>8</sup>                       | 49        |
|            | Vacuum Deposition              | Thin Films                       | n              | 0.1                                                         | 10 <sup>7</sup>                                        | 50        |
|            | Vacuum Deposition              | Thin Films                       | n              | 3 x 10 <sup>-3</sup> (vac)<br>3 x 10 <sup>-3</sup> (air)    | 10 <sup>3</sup> (vac)<br>10 <sup>1</sup> (air)         | 50        |
|            | Vacuum Deposition              | Thin Films                       | n              | 6 x 10 <sup>-3</sup> (vac)<br>7 x 10 <sup>-3</sup> (air)    | 10 <sup>4</sup> (vac)<br>10 <sup>4</sup> (air)         | 50        |
|            | Spin Coating                   | Thin Films                       | n              | 0.16                                                        | 10 <sup>8</sup>                                        | 51        |
|            | Vacuum Deposition              | Thin Films                       | n              | 0.16                                                        | 10 <sup>7</sup>                                        | 51        |
| 008        | Solution-Shearing              | Thin Films                       | Ambipolar      | 0.01±0.002 (p)<br>0.13±0.012 (n)                            | 1.1 x 10 <sup>3</sup> (p)<br>1.0 x 10 <sup>4</sup> (n) | 52        |
| 009        | Spin Coating                   | Thin Films                       | Ambipolar      | 1 x 10 <sup>-4</sup> (p)<br>1 x 10 <sup>-3</sup> (n)        | 10 <sup>5</sup> (p)<br>10 <sup>4</sup> (n)             | 51        |
| 010        | -                              | -                                | -              | -                                                           | -                                                      | 51        |
| 011        | Spin Coating                   | Thin Films                       | n              | 1 x 10 <sup>-3</sup>                                        | 10 <sup>4</sup>                                        | 51        |
| 012        | Vacuum Deposition              | Thin Films                       | -              | -                                                           | -                                                      | 53        |
| 013        | Vacuum Deposition              | Thin Films                       | n              | 0.17                                                        | 2 x 10 <sup>7</sup>                                    | 53        |
|            | -                              | -                                | n              | 6.6 x 10 <sup>-2</sup>                                      | 2 x 10 <sup>4</sup>                                    | 53        |
|            | OMBD                           | Thin Films                       | n              | 0.14                                                        | 1.2 x 10 <sup>5</sup>                                  | 54        |
| 014        | Vacuum Deposition              | Thin Films                       | n              | 1.8 x 10 <sup>-2</sup>                                      | 2 x 10 <sup>7</sup>                                    | 53        |
| 015        | Vacuum Deposition              | Thin Films                       | n              | 9.9 x 10 <sup>-3</sup>                                      | 4 x 10 <sup>6</sup>                                    | 53        |
| 016        | Vacuum Deposition              | Thin Films                       | -              | <10 <sup>-7</sup>                                           | -                                                      | 55        |
| 017        | Vacuum Deposition              | Thin Films                       | Ambipolar      | 0.71 (p)<br>0.65 (n)                                        | 10 <sup>5</sup> (p)<br>10 <sup>4</sup> (n)             | 55        |
| <b>018</b> | <b>Vacuum Deposition</b>       | <b>Thin Films</b>                | <b>p</b>       | <b>1.03</b>                                                 | <b>10<sup>5</sup></b>                                  | <b>55</b> |
| 019        | Solution-Shearing              | Thin Films                       | Ambipolar      | 0.02 (p)<br>0.12 (n)                                        | 2.1 x 10 <sup>2</sup> (p)<br>8.5 x 10 <sup>5</sup> (n) | 56        |
|            | Droplet-Pinned Crystallization | Thin Films                       | Ambipolar      | 2.5 x 10 <sup>-4</sup> (p)<br>7.7 x 10 <sup>-4</sup> (n)    | 5.3 x 10 <sup>4</sup> (p)<br>3.1 x 10 <sup>2</sup> (n) | 56        |
|            | Drop Cast                      | Thin Films                       | Ambipolar      | 8.2 x 10 <sup>-4</sup> (p)                                  | 1.5 x 10 <sup>2</sup> (p)                              | 56        |

|     |                                |            |           |                                                                                                                            |                                                                                                                                                              |        |
|-----|--------------------------------|------------|-----------|----------------------------------------------------------------------------------------------------------------------------|--------------------------------------------------------------------------------------------------------------------------------------------------------------|--------|
|     |                                |            |           | $1.6 \times 10^{-3}$ (n)                                                                                                   | $2.8 \times 10^6$ (n)                                                                                                                                        |        |
| 020 | Spin Coating                   | Thin Films | Ambipolar | $2 \times 10^{-4}$ (p)<br>$2 \times 10^{-4}$ (n)                                                                           | $10^4$ (p)<br>$10^4$ (n)                                                                                                                                     | 51     |
|     | Vacuum Deposition              | Thin Films | Ambipolar | $6 \times 10^{-4}$ (p)<br>$1 \times 10^{-2}$ (n)                                                                           | $10^7$ (p)<br>$10^6$ (n)                                                                                                                                     | 51     |
| 021 | Solution-Shearing              | Thin Films | Ambipolar | $0.01 \pm 0.001$ (p)<br>$0.02 \pm 0.002$ (n)                                                                               | $2.2 \times 10^6$ (p); $1.4 \times 10^5$ (n)                                                                                                                 | 52     |
|     | Solution-Shearing              | Thin Films | Ambipolar | $3.3 \times 10^{-4}$ (p)<br>0.04 (n)                                                                                       | $1.2 \times 10^5$ (p)<br>$2.2 \times 10^5$ (n)                                                                                                               | 56     |
|     | Droplet-Pinned Crystallization | Thin Films | Ambipolar | $2.7 \times 10^{-4}$ (p)<br>0.013 (n)                                                                                      | $4.2 \times 10^4$ (p)<br>$1.2 \times 10^4$ (n)                                                                                                               | 56     |
|     | Drop Cast                      | Thin Films | Ambipolar | $5.3 \times 10^{-7}$ (p)<br>$1.5 \times 10^{-4}$ (n)                                                                       | $5.9 \times 10^3$ (p)<br>$6.7 \times 10^5$ (n)                                                                                                               | 56     |
| 022 | Spin Coating                   | Thin Films | p         | $1 \times 10^{-4}$                                                                                                         | $10^4$                                                                                                                                                       | 51     |
| 023 | OMBD                           | Thin Films | n         | 0.07                                                                                                                       | $5.4 \times 10^5$                                                                                                                                            | 54     |
| 024 | OMBD                           | Thin Films | n         | 0.16                                                                                                                       | $6.8 \times 10^5$                                                                                                                                            | 54     |
|     | OMBD                           | Thin Films | n         | 0.05<br>(NH <sub>2</sub> -)<br>0.18<br>(PS-)<br>0.02<br>(CH <sub>3</sub> -)<br>$1.8 \times 10^{-3}$<br>(CF <sub>3</sub> -) | $5.1 \times 10^4$<br>(NH <sub>2</sub> -)<br>$4.4 \times 10^5$<br>(PS-)<br>$5.8 \times 10^4$<br>(CH <sub>3</sub> -)<br>$9 \times 10^4$<br>(CF <sub>3</sub> -) | 57     |
| 025 | Vacuum Deposition              | Thin Films | n         | $2.93 \times 10^{-5}$                                                                                                      | $10^5$                                                                                                                                                       | 58     |
| 026 | -                              | -          | n         | 0.06                                                                                                                       | -                                                                                                                                                            | 59     |
| 027 | -                              | -          | n         | 0.485                                                                                                                      | -                                                                                                                                                            | 59     |
| 028 | -                              | -          | n         | $1.8 \times 10^{-2}$                                                                                                       | -                                                                                                                                                            | 59     |
|     | -                              | -          | -         | -                                                                                                                          | -                                                                                                                                                            | 48     |
| 029 | Spin Coating                   | Thin Films | -         | -                                                                                                                          | -                                                                                                                                                            | 51     |
| 030 | Vacuum Deposition              | Thin Films | Ambipolar | $6 \times 10^{-4}$ (p)<br>0.01 (n)                                                                                         | $10^7$ (p)<br>$10^6$ (n)                                                                                                                                     | 51     |
|     | Spin Coating                   | Thin Films | p         | $1 \times 10^{-3}$                                                                                                         | $10^4$                                                                                                                                                       | 51     |
| 031 | Vacuum Deposition              | Thin Films | p         | $0.32 \pm 0.04$                                                                                                            | $2.5 \times 10^4$                                                                                                                                            | 60, 61 |
| 032 | -                              | -          | Ambipolar | 5.8 (p) <sup>a</sup><br>0.2 (n) <sup>a</sup>                                                                               | -                                                                                                                                                            | 60     |
| 033 | -                              | -          | Ambipolar | 2.9 (p) <sup>a</sup><br>0.6 (n) <sup>a</sup>                                                                               | -                                                                                                                                                            | 60     |
| 034 | -                              | Thin Films | n         | $1.02 \times 10^{-3}$                                                                                                      | $6.3 \times 10^5$                                                                                                                                            | 62     |
| 035 | -                              | Thin Films | n         | $4.6 \times 10^{-6}$                                                                                                       | $10^3$ - $10^4$                                                                                                                                              | 62     |
| 036 | -                              | -          | -         | -                                                                                                                          | -                                                                                                                                                            | 62     |

a- Means calculated value

**Table S3. The performance statistics of five-ring-fused organic molecules listed in Fig. 5 of the main text.**

| Number | Method       | Morphology | Type      | Mobility<br>( $\text{cm}^2 \text{V}^{-1} \text{s}^{-1}$ )         | On/off<br>Ratio          | Reference |
|--------|--------------|------------|-----------|-------------------------------------------------------------------|--------------------------|-----------|
| 037    | -            | -          | -         | -                                                                 | -                        | 51        |
| 038    | -            | -          | -         | -                                                                 | -                        | 51        |
| 039    | -            | -          | -         | -                                                                 | -                        | 51        |
| 040    | Spin Coating | Thin Films | p         | $1 \times 10^{-3}$                                                | $10^4$                   | 51        |
| 041    | -            | -          | -         | -                                                                 | -                        | 51        |
| 042    | Spin Coating | Thin Films | Ambipolar | $2 \times 10^{-4}$ (p)<br>$2 \times 10^{-4}$ (n)                  | $10^4$ (p)<br>$10^4$ (n) | 51        |
| 043    | -            | -          | -         | -                                                                 | -                        | 51        |
| 044    | -            | -          | -         | -                                                                 | -                        | 51        |
| 045    | -            | -          | -         | -                                                                 | -                        | 51        |
| 046    | Spin Coating | Thin Films | p         | $1 \times 10^{-2}$                                                | $10^5$                   | 51        |
| 047    | Spin Coating | Thin Films | p         | $2.5 \times 10^{-5}$ (Linear)<br>$1.5 \times 10^{-5}$ (Saturated) | -                        | 63        |
|        |              |            | p         | $3.5 \times 10^{-6}$ (Linear)<br>$4.6 \times 10^{-6}$ (Saturated) | -                        | 63        |
| 048    | Spin Coating | Thin Films | p         | $3.5 \times 10^{-5}$ (Linear)<br>$1.1 \times 10^{-4}$ (Saturated) | -                        | 63        |
|        |              |            | p         | $3.5 \times 10^{-6}$ (Linear)<br>$1.0 \times 10^{-5}$ (Saturated) | -                        | 63        |
| 049    | Spin Coating | Thin Films | p         | 0.2 (TG); 0.09 (BG)                                               | -                        | 64        |
| 050    | Spin Coating | Thin Films | p         | 0.67                                                              | $10^7$                   | 65        |
| 051    | Drop Cast    | Thin Films | p         | $>10^{-2}$ a                                                      | -                        | 66        |
| 052    | Spin Coating | Thin Films | p         | $5 \times 10^{-3}$                                                | $10^5$                   | 67        |
| 053    | Spin Coating | Thin Films | p         | $2 \times 10^{-2}$                                                | $10^5$                   | 67        |
| 054    | Spin Coating | Thin Films | p         | $2 \times 10^{-2}$                                                | $10^5$                   | 67        |
| 055    | Spin Coating | Thin Films | p         | $4 \times 10^{-2}$                                                | $10^6$                   | 67        |

a- Time-of-flight measurement



**Table S4. The performance statistics of five-ring-fused organic molecules listed in Fig. 6 of the main text.**

| Number     | Method                   | Morphology             | Type          | Mobility<br>( $\text{cm}^2 \text{V}^{-1} \text{s}^{-1}$ ) | On/off                                             | Reference |
|------------|--------------------------|------------------------|---------------|-----------------------------------------------------------|----------------------------------------------------|-----------|
| 056        | Vacuum Deposition        | Thin Films             | p             | 0.31±0.11                                                 | 1.3 x 10 <sup>6</sup>                              | 68        |
|            | Vacuum Deposition        | Thin Films             | p             | 0.245                                                     | 10 <sup>6</sup>                                    | 69        |
|            | Vacuum Deposition        | Thin Films             | p             | 0.31                                                      | -                                                  | 70        |
|            | Vacuum Deposition        | Thin Films             | p             | 0.55                                                      | 10 <sup>5</sup>                                    | 71        |
| 057        | -                        | -                      | -             | -                                                         | -                                                  | 72        |
| 058        | Vacuum Deposition        | Thin Films             | p             | 0.79±0.05                                                 | 2 x 10 <sup>7</sup>                                | 73        |
| 059        | Vacuum Deposition        | Thin Films             | p             | <10 <sup>-4</sup>                                         | -                                                  | 72        |
| 060        | Vacuum Deposition        | Thin Films             | p             | 10 <sup>-4</sup>                                          | -                                                  | 74        |
|            | Vacuum Deposition        | Thin Films             | p             | 0.298±0.06                                                | 2 x 10 <sup>7</sup>                                | 72        |
| 061        | Vacuum Deposition        | Thin Films             | p             | <10 <sup>-4</sup>                                         | -                                                  | 72        |
| 062        | Vacuum Deposition        | Thin Films             | p             | 0.23±0.04                                                 | 5 x 10 <sup>7</sup>                                | 73        |
| 063        | Vacuum Deposition        | Thin Films             | p             | <10 <sup>-4</sup>                                         | -                                                  | 72        |
| 064        | Vacuum Deposition        | Thin Films             | p             | 0.064                                                     | 10 <sup>6</sup>                                    | 69        |
| 065        | Vacuum Deposition        | Thin Films             | p             | 0.801±0.25                                                | 10 <sup>5</sup>                                    | 75        |
| 066        | Vacuum Deposition        | Thin Films             | p             | 10 <sup>-4</sup>                                          | -                                                  | 75        |
| 067        | Vacuum Deposition        | Thin Films             | p             | 0.006±0.001                                               | 2 x 10 <sup>4</sup>                                | 75        |
| 068        | Vacuum Deposition        | Thin Films             | Ambi<br>polar | 0.0569±0.007<br>(p)<br>0.216±0.08<br>(n)                  | 5 x 10 <sup>2</sup> (p)<br>3 x 10 <sup>5</sup> (n) | 74        |
| 069        | Vacuum Deposition        | Thin Films             | Ambi<br>polar | 0.225±0.05 (p)<br>0.561±0.1 (n)                           | 4 x 10 <sup>2</sup> (p)<br>10 <sup>5</sup> (n)     | 76        |
|            | -                        | -                      | Ambi<br>polar | 0.63-4.79 (p) <sup>a</sup><br>0.48-1.46 (n) <sup>a</sup>  | -                                                  | 77        |
| 070        | Vacuum Deposition        | Thin Films             | p             | 0.241±0.02                                                | 3 x 10 <sup>6</sup>                                | 72        |
| 071        | Vacuum Deposition        | Thin Films             | p             | 0.293±0.09                                                | 10 <sup>4</sup>                                    | 72        |
| 072        | Vacuum Deposition        | Thin Films             | p             | 0.41                                                      | 10 <sup>5</sup>                                    | 78, 79    |
| <b>073</b> | <b>Self-Assembly</b>     | <b>Single Crystals</b> | <b>p</b>      | <b>1.66</b>                                               | <b>10<sup>6</sup></b>                              | <b>80</b> |
| <b>074</b> | <b>Self-Assembly</b>     | <b>Single Crystals</b> | <b>p</b>      | <b>1.66</b>                                               | <b>10<sup>6</sup></b>                              | <b>80</b> |
| 075        | Vacuum Deposition        | Thin Films             | p             | 2.6 x 10 <sup>-3</sup>                                    | -                                                  | 81        |
| 076        | Vacuum Deposition        | Thin Films             | p             | 0.012                                                     | 10 <sup>4</sup>                                    | 81        |
| 077        | Vacuum Deposition        | Thin Films             | p             | 1.8 x 10 <sup>-5</sup>                                    | -                                                  | 81        |
| 078        | Vacuum Deposition        | Thin Films             | p             | 7 x 10 <sup>-3</sup>                                      | 10 <sup>6</sup>                                    | 81        |
| <b>079</b> | <b>Vacuum Deposition</b> | <b>Polycrystals</b>    | <b>p</b>      | <b>1.1</b>                                                | -                                                  | <b>82</b> |
|            | <b>Solution</b>          | <b>Single Crystals</b> | <b>p</b>      | <b>1.5</b>                                                | -                                                  | <b>82</b> |
| 080        | Vacuum Deposition        | Polycrystals           | p             | 0.45                                                      | -                                                  | 82        |
|            | <b>Solution</b>          | <b>Single Crystals</b> | <b>p</b>      | <b>1.0</b>                                                | -                                                  | <b>82</b> |
| <b>081</b> | <b>Vacuum Deposition</b> | <b>Polycrystals</b>    | <b>p</b>      | <b>3.7</b>                                                | -                                                  | <b>82</b> |
|            | <b>Solution</b>          | <b>Single Crystals</b> | <b>p</b>      | <b>9.5</b>                                                | -                                                  | <b>82</b> |
|            | <b>Vacuum Deposition</b> | <b>Thin Films</b>      | <b>p</b>      | <b>1.2</b>                                                | <b>2.5 x 10<sup>6</sup></b>                        | <b>83</b> |
| <b>082</b> | <b>Vacuum Deposition</b> | <b>Polycrystals</b>    | <b>p</b>      | <b>4.0</b>                                                | -                                                  | <b>82</b> |
|            | <b>Solution</b>          | <b>Single Crystals</b> | <b>p</b>      | <b>6.5</b>                                                | -                                                  | <b>82</b> |

|            |                                 |                        |          |                |                       |           |
|------------|---------------------------------|------------------------|----------|----------------|-----------------------|-----------|
| <b>083</b> | <b>Physical Vapor Transport</b> | <b>Single Crystals</b> | <b>p</b> | <b>0.5-1.6</b> | <b>10<sup>4</sup></b> | <b>84</b> |
| <b>084</b> | <b>Drop Cast</b>                | <b>Single Crystals</b> | <b>p</b> | <b>4.7</b>     | <b>10<sup>5</sup></b> | <b>85</b> |

a- Means calculated value

**Table S5. The performance statistics of five-ring-fused organic molecules listed in Fig. 8 of the main text.**

| Number     | Method                           | Morphology             | Type     | Mobility<br>(cm <sup>2</sup> V <sup>-1</sup> s <sup>-1</sup> ) | On/off                                     | Reference  |
|------------|----------------------------------|------------------------|----------|----------------------------------------------------------------|--------------------------------------------|------------|
| 085        | Vacuum Deposition                | Thin Films             | p        | 0.012                                                          | 10 <sup>5</sup>                            | 86         |
|            | Vacuum Deposition                | Thin Films             | p        | 0.12 ( <i>anti</i> -)                                          | -                                          | 87         |
|            | Vacuum Deposition                | Thin Films             | p        | 0.14                                                           | 10 <sup>4</sup>                            | 71         |
| 086        | Vacuum Deposition                | Thin Films             | p        | 0.02 ( <i>syn</i> -)                                           | -                                          | 87         |
| 087        | Vacuum Deposition                | Thin Films             | p        | 0.3                                                            | 10 <sup>3</sup>                            | 86         |
|            | Vacuum Deposition                | Thin Films             | p        | 0.084 ( <i>syn</i> -)<br>0.41 ( <i>anti</i> -)                 | -                                          | 88         |
| <b>088</b> | <b>Vacuum Deposition</b>         | <b>Thin Films</b>      | <b>p</b> | <b>1.3</b>                                                     | <b>3.5 x 10<sup>6</sup></b>                | <b>89</b>  |
| 089        | Vacuum Deposition                | Thin Films             | p<br>n   | 4.8 x 10 <sup>-2</sup> (p)<br>3.0 x 10 <sup>-4</sup> (n)       | 10 <sup>6</sup> (p)<br>10 <sup>3</sup> (n) | 86         |
| 090        | Vacuum Deposition                | Thin Films             | p        | 0.15±0.02                                                      | -                                          | 90         |
|            | Vacuum Deposition                | Thin Films             | p        | 0.01-0.02                                                      | -                                          | 91         |
| 091        | Vacuum Deposition                | Thin Films             | p        | 0.14±0.02                                                      | -                                          | 90         |
| 092        | Vacuum Deposition                | Thin Films             | p        | 0.06±0.01                                                      | -                                          | 90         |
| <b>093</b> | <b>Physical Vapor Transport</b>  | <b>Single Crystals</b> | <b>p</b> | <b>4.08</b>                                                    | <b>10<sup>4</sup>-10<sup>6</sup></b>       | 92         |
| 094        | Drop Cast                        | Thin Films             | p        | 5 x 10 <sup>-4</sup>                                           | 10 <sup>3</sup>                            | 93         |
| 095        | Drop Cast                        | Thin Films             | p        | 1 x 10 <sup>-3</sup>                                           | 10 <sup>2</sup>                            | 93         |
| 096        | Drop Cast                        | Thin Films             | p        | 1.5 x 10 <sup>-3</sup>                                         | 10 <sup>4</sup>                            | 93         |
| 097        | Drop Cast                        | Thin Films             | p        | 0.013                                                          | 10 <sup>4</sup>                            | 94         |
|            | Spin Coating                     | Thin Films             | p        | 0.12±0.02                                                      | 10 <sup>4</sup>                            | 95         |
| 098        | Spread                           | Thin Films             | p        | -                                                              | -                                          | 96         |
| <b>099</b> | <b>Spread</b>                    | <b>Thin Films</b>      | <b>p</b> | <b>1.0</b>                                                     | <b>10<sup>7</sup></b>                      | <b>96</b>  |
|            | Spin Coating                     | Thin Films             | p        | 0.11±0.09                                                      | 2 x 10 <sup>3</sup>                        | 97         |
|            | Lamination                       | Thin Films             | p        | 0.19±0.06                                                      | -                                          | 98         |
|            | Spin Coating                     | Thin Films             | p        | 0.1                                                            | -                                          | 99         |
|            | Spin Coating                     | Thin Films             | p        | -                                                              | -                                          | 100        |
|            | Drop Cast                        | Thin Films             | p        | 0.1-0.4                                                        | 10 <sup>5</sup>                            | 101        |
|            | Spin Coating                     | Thin Films             | p        | 0.47                                                           | 10 <sup>6</sup>                            | 102        |
|            | Drop Cast                        | Thin Films             | p        | 0.04±0.011                                                     | 3 x 10 <sup>6</sup>                        | 103        |
|            | <b>Spin Coating</b>              | <b>Thin Films</b>      | <b>p</b> | <b>1.1</b>                                                     | <b>&gt;10<sup>6</sup></b>                  | <b>104</b> |
|            | Spin Coating                     | Thin Films             | p        | 0.84                                                           | 10 <sup>6</sup>                            | 105        |
|            | Spin Coating                     | Thin Films             | p        | 0.68±0.04                                                      | 10 <sup>6</sup>                            | 106        |
|            | <b>Drop Cast</b>                 | <b>Thin Films</b>      | <b>p</b> | <b>1.3</b>                                                     | <b>10<sup>9</sup></b>                      | <b>107</b> |
|            | Spin Coating                     | Thin Films             | p        | 0.37±0.03                                                      | 10 <sup>3</sup> -10 <sup>4</sup>           | 108        |
|            | Spin Coating                     | Thin Films             | p        | 0.1-0.4                                                        | -                                          | 109        |
|            | <b>Spin Coating</b>              | <b>Thin Films</b>      | <b>p</b> | <b>1.38</b>                                                    | <b>10<sup>7</sup></b>                      | <b>110</b> |
|            | Spin Coating                     | Thin Films             | p        | 0.56                                                           | 10 <sup>7</sup>                            | 111        |
|            | <b>Dip Coating</b>               | <b>Thin Films</b>      | <b>p</b> | <b>1.82</b>                                                    | -                                          | <b>112</b> |
|            | Solvent-Assisted Crystallization | Thin Films             | p        | 0.06±0.01 ( $\alpha$ )<br>0.22±0.03 ( $\beta$ )                | -                                          | 113        |

|                     |                                           |                        |            |                                  |                           |            |
|---------------------|-------------------------------------------|------------------------|------------|----------------------------------|---------------------------|------------|
|                     | <b>Spin Coating</b>                       | <b>Thin Films</b>      | <b>p</b>   | <b>1.3-1.6</b>                   | <b>-</b>                  | <b>114</b> |
|                     | <b>Drop Cast</b>                          | <b>Thin Films</b>      | <b>p</b>   | <b>2.1</b>                       | <b>10<sup>7</sup></b>     | <b>115</b> |
|                     | <b>Spin Coating</b>                       | <b>Thin Films</b>      | <b>p</b>   | <b>1.32</b>                      | <b>&gt;10<sup>6</sup></b> | <b>116</b> |
|                     | Spin Coating                              | Thin Films             | p          | 0.80±0.07                        | 1.46 x 10 <sup>6</sup>    | 117        |
|                     | <b>Spin Coating</b>                       | <b>Thin Films</b>      | <b>p</b>   | <b>3.08</b>                      | <b>-</b>                  | <b>118</b> |
|                     | Spin Coating                              | Thin Films             | p          | 1.65 x 10 <sup>-3</sup>          | -                         | 119        |
|                     | Spin Coating                              | Thin Films             | p          | 0.3                              | 10 <sup>5</sup>           | 120        |
|                     | Spin Coating                              | Thin Films             | p          | 0.36                             | -                         | 121        |
|                     | Solvent Assisted Crystallization          | Thin Films             | p          | 0.11±0.02                        | -                         | 122        |
|                     | Vibration Assisted Crystallization        | Thin Films             | p          | 0.2±0.01                         | -                         | 122        |
|                     | Spin Coating                              | Thin Films             | p          | 0.303±0.044                      | 10 <sup>6</sup>           | 123        |
|                     | Spin Coating                              | Thin Films             | p          | 0.34                             | 10 <sup>6</sup>           | 124        |
|                     | Spin Coating                              | Thin Films             | p          | <b>0.29</b>                      | 10 <sup>6</sup>           | <b>125</b> |
| <b>100</b>          | <b>Spin Coating</b>                       | <b>Thin Films</b>      | <b>p</b>   | <b>1.5</b>                       | <b>-</b>                  | <b>100</b> |
|                     | <b>Spin Coating</b>                       | <b>Thin Films</b>      | <b>p</b>   | <b>4.3±0.8</b>                   | <b>-</b>                  | <b>126</b> |
|                     | Spin Coating                              | Thin Films             | p          | 0.1-0.2                          | -                         | 127        |
|                     | Spin Coating                              | Thin Films             | p          | 0.4±0.1                          | -                         | 128        |
|                     | <b>Physical Vapor Transport</b>           | <b>Single Crystals</b> | <b>p</b>   | <b>6</b>                         | <b>10<sup>8</sup></b>     | <b>129</b> |
|                     | <b>Spin Coating</b>                       | <b>Thin Films</b>      | <b>p</b>   | <b>1.5</b>                       | <b>-</b>                  | <b>130</b> |
|                     | Spin Coating                              | Thin Films             | p          | 0.1-0.2                          | -                         | 131        |
|                     | <b>Physical Vapor Transport</b>           | <b>Single Crystals</b> | <b>p</b>   | <b>0.6 (250K)<br/>1.4 (330K)</b> | <b>-</b>                  | <b>132</b> |
|                     | Spin Coating                              | Thin Films             | p          | 0.1-0.2                          | -                         | 133        |
|                     | Drop Cast                                 | Thin Films             | p          | 0.002-0.029                      | -                         | 134        |
|                     | Spray                                     | Thin Films             | p          | 0.2                              | 10 <sup>7</sup>           | 135        |
|                     | <b>Spin Coating</b>                       | <b>Thin Films</b>      | <b>p</b>   | <b>2.4</b>                       | <b>-</b>                  | <b>136</b> |
|                     | <b>Spin Coating</b>                       | <b>Thin Films</b>      | <b>p</b>   | <b>2.47±0.3</b>                  | <b>-</b>                  | <b>137</b> |
|                     | <b>Spin Coating</b>                       | <b>Thin Films</b>      | <b>p</b>   | <b>&gt;1</b>                     | <b>-</b>                  | <b>138</b> |
|                     | <b>Dip Coating</b>                        | <b>Thin Films</b>      | <b>p</b>   | <b>0.92-1.5</b>                  | <b>10<sup>5</sup></b>     | <b>139</b> |
|                     | <b>Physical Vapor Transport</b>           | <b>Single Crystals</b> | <b>p</b>   | <b>1.01-1.07</b>                 | <b>10<sup>6</sup></b>     | <b>140</b> |
|                     | Spin Coating                              | Thin Films             | p          | >0.1                             | -                         | 141        |
|                     | Spin Coating                              | Thin Films             | p          | 0.3±0.052                        | 1.3 x 10 <sup>7</sup>     | 142        |
|                     | Solvent Assisted Crystallization          | Thin Films             | p          | 0.8±0.4                          | -                         | 122        |
|                     | <b>Vibration Assisted Crystallization</b> | <b>Thin Films</b>      | <b>p</b>   | <b>2.5±0.8</b>                   | <b>-</b>                  | <b>122</b> |
| <b>Spin Coating</b> | <b>Thin Films</b>                         | <b>p</b>               | <b>1-3</b> | <b>-</b>                         | <b>143</b>                |            |
| Inkjet Printing     | Thin Films                                | p                      | 0.4        | -                                | 144                       |            |
| Spin Coating        | Thin Films                                | p                      | 0.09       | -                                | 145                       |            |
| <b>Spin Coating</b> | <b>Thin Films</b>                         | <b>p</b>               | <b>2-6</b> | <b>-</b>                         | <b>146</b>                |            |
| Spin Coating        | Thin Films                                | p                      | 0.52±0.22  | >10 <sup>7</sup>                 | 147                       |            |
| <b>Spin Coating</b> | <b>Thin Films</b>                         | <b>p</b>               | <b>1.5</b> | <b>1.2 x 10<sup>5</sup></b>      | <b>148</b>                |            |
| Spin Coating        | Thin Films                                | p                      | 0.7        | -                                | 149                       |            |

|     |                                             |                   |          |                                    |                             |            |
|-----|---------------------------------------------|-------------------|----------|------------------------------------|-----------------------------|------------|
|     | Inkjet Printing                             | Thin Films        | p        | 0.68±0.23                          | -                           | 150        |
|     | Spin Coating                                | Thin Films        | p        | -                                  | -                           | 151        |
|     | <b>Spin Coating</b>                         | <b>Thin Films</b> | <b>p</b> | <b>1.5±0.7</b>                     | -                           | <b>152</b> |
|     | <b>Spray</b>                                | <b>Thin Films</b> | <b>p</b> | <b>&gt;1</b>                       | -                           | <b>153</b> |
|     | Printing                                    | Thin Films        | p        | 0.07                               | 10 <sup>7</sup>             | 154        |
|     | Spin Coating                                | Thin Films        | p        | 0.07                               | 10 <sup>7</sup>             | 155        |
|     | Drop Cast                                   | Thin Films        | p        | -                                  | -                           | 156        |
|     | Spin Coating                                | Thin Films        | p        | -                                  | -                           | 157        |
|     | Coating                                     | Thin Films        | p        | 0.19±0.07                          | 10 <sup>4</sup>             | 158        |
|     | Spin Coating                                | Thin Films        | p        | -                                  | -                           | 159        |
|     | <b>Blade Coating</b>                        | <b>Thin Films</b> | <b>p</b> | <b>3.6</b>                         | -                           | <b>160</b> |
|     | <b>Spray</b>                                | <b>Thin Films</b> | <b>p</b> | <b>1.7</b>                         | <b>7.9 x 10<sup>3</sup></b> | <b>161</b> |
|     | <b>Spin Coating</b>                         | <b>Thin Films</b> | <b>p</b> | <b>&gt;2</b>                       | -                           | <b>162</b> |
|     | Drop Cast                                   | Thin Films        | p        | 0.7                                | -                           | 163        |
|     | Bar-Assisted<br>Meniscus Shearing           | Thin Films        | p        | 0.04                               | -                           | 164        |
|     | <b>Spin Coating</b>                         | <b>Thin Films</b> | <b>p</b> | <b>8</b>                           | -                           | <b>165</b> |
|     | Inkjet Printing                             | Thin Films        | p        | 0.2                                | -                           | 166        |
|     | <b>Spin Coating</b>                         | <b>Thin Films</b> | <b>p</b> | <b>0.004-7.7</b>                   | <b>~10<sup>4</sup></b>      | <b>167</b> |
|     | Spin Coating                                | Thin Films        | p        | 0.34±0.01                          | 10 <sup>7</sup>             | 168        |
|     | Coating                                     | Thin Films        | p        | 0.8                                | 10 <sup>6</sup>             | 169        |
|     | Spin Coating                                | Thin Films        | p        | -                                  | -                           | 170        |
|     | <b>Solution Shearing</b>                    | <b>Thin Films</b> | <b>p</b> | <b>1.3</b>                         | <b>10<sup>5</sup></b>       | <b>171</b> |
|     | <b>Blade Coating</b>                        | <b>Thin Films</b> | <b>p</b> | <b>5.54</b>                        | <b>10<sup>6</sup></b>       | <b>172</b> |
|     | Bar-Assisted<br>Meniscus Shearing<br>(BAMS) | Thin Films        | p        | -                                  | -                           | 173        |
|     | Blade Coating                               | Thin Films        | p        | 0.14-0.57                          | -                           | 174        |
|     | <b>Blade Coating</b>                        | <b>Thin Films</b> | <b>p</b> | <b>2.48</b>                        | -                           | <b>175</b> |
|     | <b>Water-Surface<br/>Drag Coating</b>       | <b>Thin Films</b> | <b>p</b> | <b>16.1</b>                        | <b>10<sup>6</sup></b>       | <b>176</b> |
| 101 | -                                           | -                 | -        | -                                  | -                           | 140        |
| 102 | Drop Cast                                   | Thin Films        | p        | -                                  | -                           | 134        |
| 103 | Drop Cast                                   | Thin Films        | p        | 0.1-0.4                            | 10 <sup>5</sup>             | 101        |
| 104 | Drop Cast                                   | Thin Films        | p        | <10 <sup>-4</sup>                  | -                           | 101        |
| 105 | Drop Cast                                   | Thin Films        | p        | 10 <sup>-3</sup> -10 <sup>-4</sup> | -                           | 101        |
| 106 | Drop Cast                                   | Single Crystals   | -        | -                                  | -                           | 177        |
| 107 | Spread                                      | Thin Films        | p        | <10 <sup>-4</sup>                  | 10 <sup>3</sup>             | 96         |
|     | Drop Cast                                   | Single Crystals   | p        | 0.1                                | -                           | 100        |
|     | Spin Coating                                | Thin Films        | p        | 0.3-0.6                            | -                           | 178        |
| 108 | Drop Cast                                   | Single Crystals   | p        | 0.1                                | -                           | 100        |
|     | Spin Coating                                | Thin Films        | p        | 0.03-0.11                          | -                           | 178        |
|     | Drop Cast                                   | Thin Films        | p        | 0.002-0.029                        | -                           | 134        |
|     | Physical Vapor<br>Transport                 | Single Crystals   | p        | 0.3-0.41                           | 10 <sup>6</sup>             | 140        |
|     | Solvent Assisted<br>Crystallization         | Thin Films        | p        | 0.03±0.02                          | -                           | 122        |

|            |                                    |                   |          |                         |                           |            |
|------------|------------------------------------|-------------------|----------|-------------------------|---------------------------|------------|
|            | Vibration Assisted Crystallization | Thin Films        | p        | 0.11±0.03               | -                         | 122        |
| 109        | -                                  | -                 | -        | -                       | -                         | 134        |
| 110        | -                                  | -                 | -        | -                       | -                         | 140        |
| 111        | Spin Coating                       | Thin Films        | p        | 0.07                    | 10 <sup>7</sup>           | 179        |
| 112        | Solvent Assisted Crystallization   | Thin Films        | p        | 2.5 x 10 <sup>-3</sup>  | -                         | 180        |
| <b>113</b> | <b>Drop Cast</b>                   | <b>Thin Films</b> | <b>p</b> | <b>5.4</b>              | <b>-</b>                  | <b>181</b> |
|            | <b>Spin Coating</b>                | <b>Thin Films</b> | <b>p</b> | <b>3.7</b>              | <b>-</b>                  | <b>181</b> |
|            | <b>Spray</b>                       | <b>Thin Films</b> | <b>p</b> | <b>2.2</b>              | <b>-</b>                  | <b>181</b> |
|            | Drop Cast                          | Thin Films        | p        | 6.17 x 10 <sup>-3</sup> | -                         | 182        |
|            | Spin Coating                       | Thin Films        | p        | 0.3                     | -                         | 183        |
|            | <b>Spin Coating</b>                | <b>Thin Films</b> | <b>p</b> | <b>6.2±0.4</b>          | <b>-</b>                  | <b>126</b> |
| 114        | Spin Coating                       | Thin Films        | p        | 10 <sup>-6</sup>        | -                         | 184        |
| 115        | Spin Coating                       | Thin Films        | p        | 10 <sup>-2</sup>        | -                         | 184        |
| 116        | Spin Coating                       | Thin Films        | p        | 10 <sup>-6</sup>        | -                         | 184        |
| 117        | Vacuum Deposition                  | Thin Films        | p        | -                       | -                         | 185        |
|            | Drop Cast                          | Thin Films        | p        | -                       | -                         | 185        |
| 118        | Vacuum Deposition                  | Thin Films        | p        | 0.074                   | 10 <sup>8</sup>           | 185        |
|            | Drop Cast                          | Thin Films        | p        | 3.5 x 10 <sup>-3</sup>  | 10 <sup>4</sup>           | 185        |
| 119        | Vacuum Deposition                  | Thin Films        | p        | 2.3 x 10 <sup>-3</sup>  | 2 x 10 <sup>3</sup>       | 186        |
| 120        | -                                  | -                 | -        | -                       | -                         | 185        |
| 121        | Vacuum Deposition                  | Thin Films        | p        | 0.019                   | 10 <sup>6</sup>           | 185        |
|            | Drop Cast                          | Thin Films        | p        | 2.5 x 10 <sup>-4</sup>  | 10 <sup>4</sup>           | 185        |
|            | Vacuum Deposition                  | Thin Films        | p        | 0.012                   | -                         | 187        |
| 122        | -                                  | -                 | -        | -                       | -                         | 188        |
| 123        | -                                  | -                 | -        | -                       | -                         | 187        |
| 124        | Spin Coating                       | Thin Films        | p        | 5.2 x 10 <sup>-4</sup>  | -                         | 188        |
| 125        | Spin Coating                       | Thin Films        | p        | -                       | -                         | 188        |
| 126        | Spin Coating                       | Thin Films        | p        | 6.0 x 10 <sup>-4</sup>  | -                         | 188        |
| 127        | Vacuum Deposition                  | Thin Films        | p        | 10 <sup>-4</sup>        | 10 <sup>3</sup>           | 186        |
| 128        | -                                  | -                 | -        | -                       | -                         | 189        |
| <b>129</b> | <b>Vacuum Deposition</b>           | <b>Thin Films</b> | <b>p</b> | <b>5.6</b>              | <b>10<sup>7</sup></b>     | <b>190</b> |
| 130        | Vacuum Deposition                  | Thin Films        | p        | 0.1                     | -                         | 189        |
| 131        | Vacuum Deposition                  | Thin Films        | p        | 0.4                     | 5 x 10 <sup>5</sup>       | 191        |
| 132        | Vacuum Deposition                  | Thin Films        | p        | 0.6                     | 7 x 10 <sup>5</sup>       | 191        |
| 133        | Vacuum Deposition                  | Thin Films        | p        | 0.09                    | 7 x 10 <sup>4</sup>       | 191        |
| <b>134</b> | <b>Vacuum Deposition</b>           | <b>Thin Films</b> | <b>p</b> | <b>1.1</b>              | <b>4 x 10<sup>6</sup></b> | <b>191</b> |
|            | <b>Vacuum Deposition</b>           | <b>Thin Films</b> | <b>p</b> | <b>1.86</b>             | <b>-</b>                  | <b>190</b> |
| 135        | Vacuum Deposition                  | Thin Films        | p        | 0.24                    | 2 x 10 <sup>6</sup>       | 191        |
| 136        | Vacuum Deposition                  | Thin Films        | p        | 0.34                    | 2 x 10 <sup>6</sup>       | 191        |
| 137        | -                                  | -                 | -        | -                       | -                         | 192        |
| 138        | -                                  | -                 | -        | -                       | -                         | 192        |
| 139        | -                                  | -                 | -        | -                       | -                         | 192        |
| 140        | -                                  | -                 | -        | -                       | -                         | 192        |
| 141        | -                                  | -                 | -        | -                       | -                         | 192        |
| 142        | Spin Coating                       | Thin Films        | p        | 1.31 x 10 <sup>-3</sup> | -                         | 193        |

|            |                          |                   |          |                         |                              |            |
|------------|--------------------------|-------------------|----------|-------------------------|------------------------------|------------|
| <b>143</b> | <b>Spin Coating</b>      | <b>Thin Films</b> | <b>p</b> | <b>1.06</b>             | <b>3.01 x 10<sup>6</sup></b> | <b>193</b> |
| <b>144</b> | <b>Spin Coating</b>      | <b>Thin Films</b> | <b>p</b> | <b>1.02</b>             | <b>2.06 x 10<sup>6</sup></b> | <b>193</b> |
| 145        | Spin Coating             | Thin Films        | p        | 9.47 x 10 <sup>-2</sup> | 1.21 x 10 <sup>6</sup>       | 194        |
| 146        | Spin Coating             | Thin Films        | p        | 0.683                   | 4.83 x 10 <sup>6</sup>       | 194        |
| 147        | Spin Coating             | Thin Films        | p        | 3.6 x 10 <sup>-4</sup>  | 3.45 x 10 <sup>3</sup>       | 194        |
| 148        | Physical Vapor Transport | Single Crystal    | p        | 0.2                     | 6.4 x 10 <sup>3</sup>        | 195        |
| 149        | Vacuum Deposition        | Thin Films        | p        | 0.002                   | 10 <sup>4</sup>              | 196        |
| 150        | Vacuum Deposition        | Thin Films        | p        | 0.001                   | 10 <sup>4</sup>              | 196        |
| 151        | Vacuum Deposition        | Thin Films        | p        | -                       | -                            | 196        |

**Table S6. The performance statistics of five-ring-fused organic molecules listed in Fig. 10 of the main text.**

| Number     | Method                   | Morphology                           | Type     | Mobility<br>( $\text{cm}^2 \text{V}^{-1} \text{s}^{-1}$ )  | On/off                   | Reference  |
|------------|--------------------------|--------------------------------------|----------|------------------------------------------------------------|--------------------------|------------|
| <b>152</b> | Vacuum Deposition        | Thin Films                           | p        | $2.4 \times 10^{-3}$                                       | $10^5$                   | 197        |
|            | Drop Cast                | Thin Films                           | p        | 0.01                                                       | $10^5$                   | 198        |
|            | -                        | -                                    | <b>p</b> | <b>4.5(KMC)<sup>a</sup></b><br><b>9.4(SCD)<sup>a</sup></b> | -                        | <b>199</b> |
| 153        | Drop Cast                | Thin Films                           | p        | $1 \times 10^{-3}$                                         | $10^5$                   | 198        |
| 154        | Vacuum Deposition        | Thin Films                           | p        | $3 \times 10^{-3}$                                         | $10^5$ - $10^6$          | 200        |
| 155        | Vacuum Deposition        | Thin Films                           | p        | $3 \times 10^{-3}$                                         | $10^5$ - $10^6$          | 200        |
| 156        | Vacuum Deposition        | Thin Films                           | p        | $1.2 \times 10^{-2}$                                       | $10^3$                   | 201        |
| 157        | Vacuum Deposition        | Thin Films                           | p        | $9 \times 10^{-4}$                                         | $10^3$                   | 201        |
| 158        | Vacuum Deposition        | Thin Films                           | p        | $2 \times 10^{-2}$                                         | $10^4$                   | 201        |
| 159        | Vacuum Deposition        | Thin Films                           | p        | $2.3 \times 10^{-2}$                                       | $10^4$                   | 201        |
| 160        | Vacuum Deposition        | Thin Films                           | p        | $6.6 \times 10^{-2}$                                       | $10^4$                   | 201        |
| 161        | Vacuum Deposition        | Thin Films                           | p        | 0.65                                                       | $10^4$                   | 201        |
|            | Spin Coating             | Thin Films                           | p        | $5 \times 10^{-2}$                                         | $10^5$                   | 201        |
|            | Drop Cast                | Thin Films                           | p        | 0.26                                                       | $10^2$                   | 201        |
| <b>162</b> | <b>Vacuum Deposition</b> | <b>Thin Films</b>                    | <b>p</b> | <b>1.9</b>                                                 | <b><math>10^5</math></b> | <b>201</b> |
|            | Spin Coating             | Thin Films                           | p        | $4.3 \times 10^{-2}$                                       | $10^5$                   | 201        |
|            | <b>Drop Cast</b>         | <b>Thin Films</b>                    | <b>p</b> | <b>0.24 (1.6)</b>                                          | <b><math>10^5</math></b> | <b>201</b> |
| 163        | Vacuum Deposition        | Thin Films                           | p        | 0.47                                                       | $10^5$                   | 201        |
|            | Spin Coating             | Thin Films                           | p        | $2.3 \times 10^{-2}$                                       | $10^4$                   | 201        |
|            | Drop Cast                | Thin Films                           | p        | 0.11                                                       | $10^3$                   | 201        |
| 164        | Vacuum Deposition        | Thin Films                           | p        | 0.15                                                       | $10^5$                   | 201        |
|            | Spin Coating             | Thin Films                           | p        | $5.6 \times 10^{-3}$                                       | $10^3$                   | 201        |
|            | Drop Cast                | Thin Films                           | p        | 0.1                                                        | $10^3$                   | 201        |
| 165        | Spin Coating             | Thin Films                           | p        | -                                                          | -                        | 202        |
| <b>166</b> | <b>Spin Coating</b>      | <b>Thin Films</b>                    | <b>p</b> | <b>2.8</b>                                                 | <b><math>10^5</math></b> | <b>202</b> |
|            | <b>Blade-Coating</b>     | <b>Single-Crystalline Thin Films</b> | <b>p</b> | <b>6.3</b>                                                 | <b><math>10^7</math></b> | <b>202</b> |

a- Means calculated value



**Table S7. The performance statistics of five-ring-fused organic molecules listed in Fig. 11 of the main text.**

| Number | Method                          | Morphology               | Type     | Mobility<br>( $\text{cm}^2 \text{V}^{-1} \text{s}^{-1}$ ) | On/off                                     | Reference  |
|--------|---------------------------------|--------------------------|----------|-----------------------------------------------------------|--------------------------------------------|------------|
| 167    | Vacuum Deposition               | Thin Films               | p        | 0.5                                                       | $10^6$                                     | 203        |
|        | <b>Physical Vapor Transport</b> | <b>Single Crystals</b>   | <b>p</b> | <b>1.8</b>                                                | <b><math>&gt;10^7</math></b>               | <b>204</b> |
| 168    | <b>Vacuum Deposition</b>        | <b>Thin Films</b>        | <b>p</b> | <b>3.1</b>                                                | <b><math>10^3</math></b>                   | <b>205</b> |
|        | <b>Drop Cast</b>                | <b>Single Crystals</b>   | <b>p</b> | <b>18.9</b>                                               | <b><math>&gt;10^7</math></b>               | <b>206</b> |
| 169    | Physical Vapor Transport        | Single Crystals          | p        | 0.6                                                       | $10^5$                                     | 207        |
| 170    | <b>Dip Coating</b>              | <b>Thin Films</b>        | <b>p</b> | <b>3.8</b>                                                | <b><math>10^6</math></b>                   | <b>208</b> |
|        | <b>Drop Cast</b>                | <b>Single Crystals</b>   | <b>p</b> | <b>1.7</b>                                                | <b><math>10^4</math></b>                   | <b>208</b> |
| 171    | Vacuum Deposition               | Thin Films               | p        | 0.011                                                     | $4 \times 10^4$                            | 209        |
| 172    | Drop Cast                       | Single Crystals          | p        | 0.47                                                      | $10^3$ - $10^4$                            | 210        |
|        | Dip Coating                     | Thin Films               | p        | $1.4 \times 10^{-3}$                                      | $10^3$                                     | 210        |
| 173    | Vacuum Deposition               | Thin Films               | p        | 0.120                                                     | $1.6 \times 10^5$                          | 209        |
| 174    | Physical Vapor Transport        | Single Crystals          | p        | 0.014                                                     | $10^2$                                     | 211        |
| 175    | Physical Vapor Transport        | Single Crystals          | p        | 0.20                                                      | $10^5$                                     | 211        |
| 176    | <b>Physical Vapor Transport</b> | <b>Single Crystals</b>   | <b>p</b> | <b>6.5</b>                                                | <b><math>10^6</math></b>                   | <b>211</b> |
| 177    | <b>Drop Cast</b>                | <b>Single Crystals</b>   | <b>p</b> | <b>10.1</b>                                               | <b><math>10^5</math></b>                   | <b>210</b> |
|        | <b>Dip Coating</b>              | <b>Thin Films</b>        | <b>p</b> | <b>7.4</b>                                                | <b><math>10^6</math></b>                   | <b>210</b> |
| 178    | <b>Edge-Casting</b>             | <b>Thin Films</b>        | <b>p</b> | <b>6.2</b>                                                | <b><math>10^6</math></b>                   | <b>212</b> |
| 179    | Edge-Casting                    | Thin Films               | p        | 0.55                                                      | $10^5$                                     | 212        |
| 180    | <b>Edge-Casting</b>             | <b>Thin Films</b>        | <b>p</b> | <b>2.3</b>                                                | <b><math>10^6</math></b>                   | <b>212</b> |
| 181    | <b>Vacuum Deposition</b>        | <b>Thin Films</b>        | <b>p</b> | <b>4.9</b>                                                | <b><math>10^7</math>-<math>10^8</math></b> | <b>213</b> |
| 182    | <b>Vacuum Deposition</b>        | <b>Thin Films</b>        | <b>p</b> | <b>11.7</b>                                               | <b><math>10^7</math>-<math>10^8</math></b> | <b>213</b> |
| 183    | <b>Drop Cast</b>                | <b>Crystalline Films</b> | <b>p</b> | <b>12.8</b>                                               | <b><math>&gt;10^7</math></b>               | <b>214</b> |

**Table S8. The performance statistics of five-ring-fused organic molecules listed in Fig. 13 of the main text.**

| Number     | Method                   | Morphology               | Type      | Mobility<br>( $\text{cm}^2 \text{V}^{-1} \text{s}^{-1}$ ) | On/off                                     | Reference  |
|------------|--------------------------|--------------------------|-----------|-----------------------------------------------------------|--------------------------------------------|------------|
| 184        | -                        | -                        | -         | -                                                         | -                                          | 215        |
| <b>185</b> | Spin Coating             | Thin Films               | p         | $(1.2 \pm 0.8) \times 10^{-2}$                            | $10^5$                                     | 215        |
|            | <b>Dip Coating</b>       | <b>Crystalline Films</b> | <b>p</b>  | <b>1.7</b>                                                | <b><math>10^7</math></b>                   | <b>215</b> |
|            | <b>Drop Cast</b>         | <b>Crystalline Films</b> | <b>p</b>  | <b>3.2</b>                                                | <b><math>10^6</math></b>                   | <b>216</b> |
|            | Dip Coating              | Crystalline Films        | p         | -                                                         | -                                          | 217        |
|            | Dip Coating              | Crystalline Films        | p         | $2 \times 10^{-3}$                                        | -                                          | 218        |
|            | <b>Printing</b>          | <b>Thin Films</b>        | <b>p</b>  | <b>1.0</b>                                                | -                                          | <b>219</b> |
| 186        | -                        | -                        | -         | -                                                         | -                                          | 215        |
|            | Dip Coating              | Crystalline Films        | p         | 0.19                                                      | -                                          | 220        |
| 187        | -                        | -                        | -         | -                                                         | -                                          | 215        |
| 188        | Slow Cooling             | Crystalline Films        | p         | 0.04                                                      | -                                          | 221        |
| 189        | Slow Cooling             | Crystalline Films        | p         | 0.1                                                       | -                                          | 221        |
| 190        | Slow Cooling             | Crystalline Films        | p         | 0.16                                                      | -                                          | 221        |
| 191        | Spin Coating             | Thin Films               | n         | 0.57                                                      | -                                          | 222        |
| 192        | Spin Coating             | Thin Films               | Ambipolar | $3.4 \times 10^{-2}$ (p)<br>0.22 (n)                      | -                                          | 222        |
| 193        | Spin Coating             | Thin Films               | Ambipolar | $1.3 \times 10^{-3}$ (p)<br>0.17 (n)                      | -                                          | 222        |
| <b>194</b> | <b>Vacuum Deposition</b> | <b>Thin Films</b>        | <b>p</b>  | <b>2.6</b>                                                | <b><math>10^7</math>-<math>10^8</math></b> | <b>223</b> |
| 195        | Vacuum Deposition        | Thin Films               | p         | 0.59                                                      | $10^7$ - $10^8$                            | 223        |
| 196        | Vacuum Deposition        | Thin Films               | p         | 0.85                                                      | $10^7$ - $10^8$                            | 223        |
| 197        | Vacuum Deposition        | Thin Films               | p         | 0.7                                                       | $10^7$ - $10^8$                            | 223        |
| 198        | Vacuum Deposition        | Thin Films               | p         | $\sim 0.1$                                                | $\sim 10^7$                                | 224        |
| 199        | Vacuum Deposition        | Thin Films               | p         | $\sim 0.1$                                                | $\sim 10^7$                                | 224        |

**Table S9. The performance statistics of five-ring-fused organic molecules listed in Fig. 15 of the main text.**

| Number | Method            | Morphology | Type | Mobility<br>( $\text{cm}^2 \text{V}^{-1} \text{s}^{-1}$ ) | On/off | Reference |
|--------|-------------------|------------|------|-----------------------------------------------------------|--------|-----------|
| 200    | Vacuum Deposition | Thin Films | p    | 0.045                                                     | $10^3$ | 225       |
| 201    | -                 | -          | n    | 0.63 <sup>a</sup>                                         | -      | 226       |

a- Means calculated value

**Table S10. The performance statistics of five-ring-fused organic molecules listed in Fig. 16 of the main text.**

| Number | Method       | Morphology | Type | Mobility<br>( $\text{cm}^2 \text{V}^{-1} \text{s}^{-1}$ ) | On/off             | Reference |
|--------|--------------|------------|------|-----------------------------------------------------------|--------------------|-----------|
| 202    | Drop Cast    | Thin Films | p    | $9 \times 10^{-3}$                                        | $4 \times 10^3$    | 227       |
| 203    | Drop Cast    | Thin Films | p    | $1.24 \times 10^{-3}$                                     | $3.1 \times 10^3$  | 227       |
| 204    | Drop Cast    | Thin Films | p    | $1.45 \times 10^{-3}$                                     | $3.3 \times 10^3$  | 227       |
| 205    | Drop Cast    | Thin Films | p    | $1.5 \times 10^{-3}$                                      | $1.7 \times 10^3$  | 227       |
| 206    | Spin Coating | Thin Films | p    | 0.073                                                     | $1.6 \times 10^6$  | 228       |
| 207    | Spin Coating | Thin Films | p    | 0.079                                                     | $1.1 \times 10^7$  | 228       |
| 208    | Spin Coating | Thin Films | -    | -                                                         | -                  | 229       |
| 209    | Spin Coating | Thin Films | -    | -                                                         | -                  | 229       |
| 210    | Spin Coating | Thin Films | p    | $1.69 \times 10^{-4}$                                     | -                  | 229       |
| 211    | Spin Coating | Thin Films | -    | -                                                         | -                  | 229       |
| 212    | Spin Coating | Thin Films | p    | 0.12                                                      | -                  | 230       |
| 213    | Spin Coating | Thin Films | p    | $3.4 \times 10^{-3}$                                      | $6.4 \times 10^4$  | 231       |
| 214    | Spin Coating | Thin Films | p    | $4.53 \times 10^{-4}$                                     | $4.27 \times 10^5$ | 231       |
| 215    | Spin Coating | Thin Films | p    | $1.13 \times 10^{-2}$                                     | $1.42 \times 10^4$ | 231       |
| 216    | Spin Cast    | Thin Films | p    | $3 \times 10^{-3}$                                        | -                  | 232       |
| 217    | Spin Coating | Thin Films | p    | 0.0368                                                    | $2 \times 10^3$    | 233       |
| 218    | Spin Coating | Thin Films | p    | $1.7 \times 10^{-2}$                                      | $4.98 \times 10^4$ | 231       |
| 219    | Drop Cast    | Thin Films | p    | 0.36                                                      | $10^5$             | 234       |
| 220    | Spin Coating | Thin Films | p    | $2.3 \times 10^{-3}$                                      | $10^3$ - $10^4$    | 235       |

**Table S11. The performance statistics of five-ring-fused organic molecules listed in Fig. 17 of the main text.**

| Number     | Method                          | Morphology             | Type     | Mobility<br>(cm <sup>2</sup> V <sup>-1</sup> s <sup>-1</sup> ) | On/off                 | Reference  |
|------------|---------------------------------|------------------------|----------|----------------------------------------------------------------|------------------------|------------|
| <b>221</b> | <b>Physical Vapor Transport</b> | <b>Single Crystals</b> | <b>p</b> | <b>1.5</b>                                                     | -                      | <b>236</b> |
| <b>222</b> | <b>Edge-Casting</b>             | <b>Single Crystals</b> | <b>p</b> | <b>1.1</b>                                                     | -                      | <b>237</b> |
| <b>223</b> | <b>Edge-Casting</b>             | <b>Single Crystals</b> | <b>p</b> | <b>1.3</b>                                                     | -                      | <b>237</b> |
| 224        | Physical Vapor Transport        | Single Crystals        | p        | 0.02-0.04                                                      | 10 <sup>3</sup>        | 84         |
| <b>225</b> | <b>Physical Vapor Transport</b> | <b>Single Crystals</b> | <b>p</b> | <b>1</b>                                                       | -                      | <b>238</b> |
| 226        | Vacuum Deposition               | Thin Films             | -        | -                                                              | -                      | 89         |
| 227        | Vacuum Deposition               | Thin Films             | p        | 0.5-0.6                                                        | 6.53 x 10 <sup>5</sup> | 89         |
| 228        | Drop Cast                       | Single Crystals        | p        | 0.11                                                           | 8 x 10 <sup>4</sup>    | 239        |
| 229        | Drop Cast                       | Single Crystals        | p        | 0.021                                                          | 2 x 10 <sup>3</sup>    | 239        |

**Table S12. The performance statistics of five-ring-fused organic molecules listed in Fig. 19 of the main text.**

| Number     | Method                          | Morphology                           | Type     | Mobility<br>( $\text{cm}^2 \text{V}^{-1} \text{s}^{-1}$ ) | On/off                        | Reference  |
|------------|---------------------------------|--------------------------------------|----------|-----------------------------------------------------------|-------------------------------|------------|
| 230        | Lamination                      | Single Crystals                      | p        | 0.11                                                      | $\sim 10^4$                   | 240        |
| <b>231</b> | <b>Vacuum Deposition</b>        | <b>Polycrystalline Thin Films</b>    | <b>p</b> | <b>3.2</b>                                                | <b><math>\sim 10^7</math></b> | <b>240</b> |
|            | <b>Drop Cast</b>                | <b>Single-Crystalline Thin Films</b> | <b>p</b> | <b>11</b>                                                 | <b><math>\sim 10^7</math></b> | <b>240</b> |
| <b>232</b> | <b>Physical Vapor Transport</b> | <b>Single Crystals</b>               | <b>p</b> | <b>1.2-2.0</b>                                            | <b><math>10^5</math></b>      | <b>84</b>  |
| <b>233</b> | <b>Drop Cast</b>                | <b>Single Crystals</b>               | <b>p</b> | <b>4.5</b>                                                | <b><math>10^5</math></b>      | <b>85</b>  |
| 234        | Vacuum Deposition               | Thin Films                           | p        | 0.31-0.75                                                 | $1.7 \times 10^6$             | 89         |
| 235        | Vacuum Deposition               | Thin Films                           | p        | 0.38-0.53                                                 | $1.2 \times 10^6$             | 89         |
| 236        | Vacuum Deposition               | Thin Films                           | p        | $3.8 \times 10^{-3}$                                      | $5 \times 10^7$               | 197        |
| 237        | Physical Vapor Transport        | Single Crystals                      | p        | $6.9 \times 10^{-3}$                                      | -                             | 241        |
| 238        | Dip Coating                     | Thin Films                           | p        | 0.058                                                     | $10^3$                        | 242        |

**Table S13. The performance statistics of five-ring-fused organic molecules listed in Fig. 20 of the main text.**

| Number     | Method           | Morphology             | Type     | Mobility<br>( $\text{cm}^2 \text{V}^{-1} \text{s}^{-1}$ ) | On/off                   | Reference |
|------------|------------------|------------------------|----------|-----------------------------------------------------------|--------------------------|-----------|
| <b>239</b> | <b>Drop Cast</b> | <b>Single Crystals</b> | <b>p</b> | <b>1.8</b>                                                | <b><math>10^4</math></b> | <b>85</b> |

**Table S14. The performance statistics of five-ring-fused organic molecules listed in Fig. 21 of the main text.**

| Number | Method                          | Morphology             | Type     | Mobility<br>( $\text{cm}^2 \text{V}^{-1} \text{s}^{-1}$ ) | On/off                                     | Reference |
|--------|---------------------------------|------------------------|----------|-----------------------------------------------------------|--------------------------------------------|-----------|
| 240    | Vacuum Deposition               | Thin Films             | p        | 0.1                                                       | -                                          | 243       |
|        | Vacuum Deposition               | Thin Films             | p        | $5.9 \times 10^{-4}$                                      | -                                          | 244       |
|        | <b>Physical Vapor Transport</b> | <b>Single Crystals</b> | <b>p</b> | <b>0.12-1.0</b>                                           | <b><math>10^5</math>-<math>10^6</math></b> | 245       |
|        | Physical Vapor Transport        | Single Crystals        | p        | 0.55                                                      | -                                          | 246       |
| 241    | <b>Physical Vapor Transport</b> | <b>Single Crystals</b> | <b>p</b> | <b>3.61</b>                                               | -                                          | 246       |
| 242    | Physical Vapor Transport        | Single Crystals        | p        | $5 \times 10^{-6}$                                        | -                                          | 246       |
| 243    | Physical Vapor Transport        | Single Crystals        | p        | $2.5 \times 10^{-5}$                                      | -                                          | 246       |
| 244    | Vacuum Deposition               | Thin Films             | p        | 0.06                                                      | $3 \times 10^4$                            | 247       |
| 245    | Vacuum Deposition               | Thin Films             | p        | 0.22                                                      | $3 \times 10^5$                            | 247       |
| 246    | Vacuum Deposition               | Thin Films             | p        | $6 \times 10^{-3}$                                        | $10^3$                                     | 247       |
| 247    | Vacuum Deposition               | Thin Films             | p        | -                                                         | -                                          | 248       |
|        | Physical Vapor Transport        | Single Crystals        | p        | -                                                         | -                                          | 248       |
| 248    | Vacuum Deposition               | Thin Films             | p        | $9.1 \times 10^{-3}$                                      | -                                          | 244       |
| 249    | Vacuum Deposition               | Thin Films             | p        | 0.02                                                      | $3 \times 10^4$                            | 247       |
| 250    | Vacuum Deposition               | Thin Films             | p        | 0.05                                                      | $3 \times 10^4$                            | 247       |
| 251    | Vacuum Deposition               | Thin Films             | p        | $4 \times 10^{-4}$                                        | $2 \times 10^0$                            | 247       |
| 252    | -                               | -                      | p        | 0.09 (KMC) <sup>a</sup><br>1.6 (SCD) <sup>a</sup>         | -                                          | 199       |
| 253    | Vacuum Deposition               | Thin Films             | -        | -                                                         | -                                          | 244       |
| 254    | Vacuum Deposition               | Thin Films             | p        | $4.1 \times 10^{-3}$                                      | -                                          | 244       |
| 255    | Vacuum Deposition               | Thin Films             | p        | 0.12                                                      | $1.2 \times 10^5$                          | 248       |
|        | Physical Vapor Transport        | Single Crystals        | p        | 0.5                                                       | -                                          | 248       |
|        | Physical Vapor Transport        | Single Crystals        | p        | 0.8                                                       | $1.7 \times 10^7$                          | 249       |
| 256    | Vacuum Deposition               | Thin Films             | p        | $1 \times 10^{-5}$                                        | -                                          | 250       |
| 257    | Vacuum Deposition               | Thin Films             | p        | $(1.3-3.0) \times 10^{-3}$                                | -                                          | 250       |
| 258    | Vacuum Deposition               | Thin Films             | p        | 0.03                                                      | $10^6$                                     | 251       |
| 259    | Vacuum Deposition               | Thin Films             | p        | 0.2                                                       | $5 \times 10^6$                            | 251       |
| 260    | Vacuum Deposition               | Thin Films             | p        | 0.015                                                     | $10^6$                                     | 251       |
| 261    | Drop Cast                       | Single Crystals        | p        | 0.084                                                     | -                                          | 252       |
| 262    | Vacuum Deposition               | Thin Films             | p        | 0.04                                                      | $10^6$                                     | 251       |
| 263    | Vacuum Deposition               | Thin Films             | p        | $10^{-3}$                                                 | $10^5$                                     | 253       |
| 264    | Vacuum Deposition               | Thin Films             | p        | -                                                         | -                                          | 251       |
| 265    | Vacuum Deposition               | Thin Films             | p        | 0.11                                                      | $5 \times 10^4$                            | 251       |
| 266    | Vacuum Deposition               | Thin Films             | p        | $1.2 \times 10^{-4}$                                      | $10^3$                                     | 254       |
| 267    | Vacuum Deposition               | Thin Films             | p        | 0.008-0.01                                                | $10^5$                                     | 254       |
| 268    | Vacuum Deposition               | Thin Films             | p        | 0.085-0.14                                                | $10^7$                                     | 254       |
| 269    | Vacuum Deposition               | Thin Films             | p        | -                                                         | -                                          | 254       |
| 270    | Vacuum Deposition               | Thin Films             | p        | -                                                         | -                                          | 254       |
| 271    | Vacuum Deposition               | Thin Films             | p        | 0.07-0.12                                                 | $10^6$ - $10^7$                            | 250       |
|        | Vacuum Deposition               | Thin Films             | p        | 0.12                                                      | $10^7$                                     | 251       |
| 272    | -                               | -                      | -        | -                                                         | -                                          | 255       |



|     |                     |            |   |                      |                   |     |
|-----|---------------------|------------|---|----------------------|-------------------|-----|
| 273 | -                   | -          | - | -                    | -                 | 255 |
| 274 | -                   | -          | - | -                    | -                 | 255 |
| 275 | -                   | -          | - | -                    | -                 | 255 |
| 276 | -                   | -          | p | $10^{-3}$ b          | -                 | 255 |
| 277 | -                   | -          | - | -                    | -                 | 255 |
| 278 | -                   | -          | - | -                    | -                 | 256 |
|     | Vacuum Deposition   | Thin Films | p | $7 \times 10^{-3}$   | $10^4$            | 257 |
|     | Vacuum Deposition   | Thin Films | p | $1 \times 10^{-4}$   | $10^2$            | 258 |
| 279 | -                   | -          | - | 0.4                  | -                 | 256 |
|     | Vacuum Deposition   | Thin Films | p | $3 \times 10^{-3}$   | $10^3$            | 257 |
|     | Vacuum Deposition   | Thin Films | p | $6 \times 10^{-2}$   | $10^3$            | 258 |
| 280 | -                   | -          | - | -                    | 259               |     |
| 281 | Vacuum Deposition   | Thin Films | p | 0.03                 | -                 | 259 |
|     | Drop Cast           | Thin Films | p | $6.4 \times 10^{-3}$ | -                 | 259 |
|     | Vacuum Deposition   | Thin Films | p | 0.1                  | $10^6$            | 258 |
| 282 | Vacuum Deposition   | Thin Films | p | $7.4 \times 10^{-4}$ | $6.4 \times 10^3$ | 260 |
|     | Shearing Deposition | Thin Films | p | $7 \times 10^{-4}$   | $3.7 \times 10^3$ | 260 |
| 283 | Vacuum Deposition   | Thin Films | p | -                    | -                 | 260 |
|     | Shearing Deposition | Thin Films | p | $7.6 \times 10^{-4}$ | $10^4$            | 260 |
| 284 | Vacuum Deposition   | Thin Films | p | $7 \times 10^{-3}$   | $2.4 \times 10^3$ | 260 |
|     | Shearing Deposition | Thin Films | p | $5.9 \times 10^{-4}$ | $6.2 \times 10^3$ | 260 |
| 285 | Vacuum Deposition   | Thin Films | p | -                    | -                 | 260 |
|     | Shearing Deposition | Thin Films | p | $4.7 \times 10^{-4}$ | $2.3 \times 10^2$ | 260 |

a- Means calculated value

b- Time-of-flight measurement

**Table S15. The performance statistics of five-ring-fused organic molecules listed in Fig. 23 of the main text.**

| Number | Method            | Morphology | Type | Mobility<br>( $\text{cm}^2 \text{V}^{-1} \text{s}^{-1}$ ) | On/off      | Reference |
|--------|-------------------|------------|------|-----------------------------------------------------------|-------------|-----------|
| 286    | Vacuum Deposition | Thin Films | p    | -                                                         | -           | 261       |
| 287    | Vacuum Deposition | Thin Films | p    | $0.25 \pm 0.09$                                           | $\sim 10^5$ | 261       |

**Table S16. The performance statistics of five-ring-fused organic molecules listed in Fig. 24 of the main text.**

| Number | Method            | Morphology | Type | Mobility<br>( $\text{cm}^2 \text{V}^{-1} \text{s}^{-1}$ ) | On/off          | Reference |
|--------|-------------------|------------|------|-----------------------------------------------------------|-----------------|-----------|
| 288    | Vacuum Deposition | Thin Films | n    | $1 \times 10^{-3}$                                        | $3 \times 10^4$ | 262       |
| 289    | Vacuum Deposition | Thin Films | n    | 0.01                                                      | $5 \times 10^6$ | 263       |
| 290    | Vacuum Deposition | Thin Films | n    | 0.02                                                      | $4 \times 10^7$ | 263       |
|        | Vacuum Deposition | Thin Films | n    | 0.02                                                      | $7 \times 10^6$ | 262       |
| 291    | Vacuum Deposition | Thin Films | n    | 0.01                                                      | $2 \times 10^7$ | 263       |
| 292    | Vacuum Deposition | Thin Films | n    | 0.01                                                      | $2 \times 10^6$ | 262       |
| 293    | Vacuum Deposition | Thin Films | n    | 0.01                                                      | $2 \times 10^5$ | 262       |
| 294    | Vacuum Deposition | Thin Films | n    | 0.06                                                      | $10^5$          | 262       |
| 295    | Vacuum Deposition | Thin Films | n    | 0.03                                                      | $5 \times 10^6$ | 262       |
|        | Spin Coating      | Thin Films | n    | $1 \times 10^{-3}$                                        | $>10^6$         | 263       |
| 296    | -                 | -          | -    | -                                                         | -               | 264       |
| 297    | -                 | -          | -    | -                                                         | -               | 264       |
| 298    | -                 | -          | -    | -                                                         | -               | 264       |
| 299    | -                 | -          | -    | -                                                         | -               | 264       |

**Table S17. The performance statistics of five-ring-fused organic molecules listed in Fig. 25 of the main text.**

| Number | Method            | Morphology | Type | Mobility<br>( $\text{cm}^2 \text{V}^{-1} \text{s}^{-1}$ ) | On/off          | Reference      |
|--------|-------------------|------------|------|-----------------------------------------------------------|-----------------|----------------|
| 300    | Vacuum Deposition | Thin Films | p    | $\sim 10^{-5}$                                            | $10^4$ - $10^5$ | <sup>265</sup> |

**Table S18. The performance statistics of five-ring-fused organic molecules listed in Fig. 26 of the main text.**

| Number | Method       | Morphology | Type | Mobility<br>( $\text{cm}^2 \text{V}^{-1} \text{s}^{-1}$ ) | On/off          | Reference |
|--------|--------------|------------|------|-----------------------------------------------------------|-----------------|-----------|
| 301    | Spin Coating | Thin Films | p    | $1.8 \times 10^{-3}$                                      | $3 \times 10^4$ | 266       |
| 302    | Spin Coating | Thin Films | -    | -                                                         | -               | 267       |
| 303    | Spin Coating | Thin Films | -    | -                                                         | -               | 267       |
| 304    | Spin Coating | Thin Films | p    | $2.3 \times 10^{-3}$                                      | $10^5$          | 268       |
| 305    | Spin Coating | Thin Films | p    | 0.02                                                      | $10^5$          | 267       |
| 306    | Spin Coating | Thin Films | p    | $9.6 \times 10^{-3}$                                      | $10^5$          | 267       |
| 307    | Spin Coating | Thin Films | p    | $1.8 \times 10^{-3}$                                      | $10^3$          | 267       |
| 308    | Spin Coating | Thin Films | p    | $6 \times 10^{-4}$                                        | $5 \times 10^4$ | 268       |

**Table S19. The performance statistics of five-ring-fused organic molecules listed in Fig. 27 of the main text.**

| Number | Method            | Morphology | Type      | Mobility<br>(cm <sup>2</sup> V <sup>-1</sup> s <sup>-1</sup> ) | On/off              | Reference |
|--------|-------------------|------------|-----------|----------------------------------------------------------------|---------------------|-----------|
| 309    | Vacuum Deposition | Thin Films | p         | 0.22                                                           | 10 <sup>4</sup>     | 269       |
| 310    | Vacuum Deposition | Thin Films | Ambipolar | 0.08 (p)<br>0.09 (n)                                           | 10 <sup>4</sup>     | 269       |
| 311    | Vacuum Deposition | Thin Films | Ambipolar | 0.23 (p)<br>0.21 (n)                                           | -                   | 270       |
| 312    | Vacuum Deposition | Thin Films | Ambipolar | 0.11 (p)<br>0.15 (n)                                           | 10 <sup>4</sup>     | 269       |
|        | -                 | -          | Ambipolar | 0.5766 (p) <sup>a</sup><br>7.441 (n) <sup>a</sup>              | -                   | 271       |
| 313    | Vacuum Deposition | Thin Films | n         | 0.07                                                           | 10 <sup>6</sup>     | 272       |
| 314    | Vacuum Deposition | Thin Films | n         | 0.03                                                           | 10 <sup>6</sup>     | 272       |
| 315    | Vacuum Deposition | Thin Films | n         | 0.02                                                           | -                   | 273       |
| 316    | Vacuum Deposition | Thin Films | p         | 1.08 x 10 <sup>-5</sup>                                        | -                   | 274       |
|        | Spin Coating      | Thin Films | p         | 8.23 x 10 <sup>-6</sup>                                        | -                   | 274       |
|        | Vacuum Deposition | Thin Films | p         | (1.5±0.2) x 10 <sup>-3</sup>                                   | -                   | 275       |
|        | Vacuum Deposition | Thin Films | p         | 0.11                                                           | -                   | 276       |
|        | Vacuum Deposition | Thin Films | Ambipolar | 0.2 (p)<br>0.01 (n)                                            | -                   | 277       |
| 317    | Vacuum Deposition | Thin Films | -         | -                                                              | -                   | 278       |
| 318    | Vacuum Deposition | Thin Films | -         | -                                                              | -                   | 278       |
|        | Vacuum Deposition | Thin Films | -         | -                                                              | -                   | 279       |
| 319    | Vacuum Deposition | Thin Films | p         | 2.4 x 10 <sup>-3</sup>                                         | 10 <sup>3</sup>     | 278       |
| 320    | Vacuum Deposition | Thin Films | -         | -                                                              | -                   | 278       |
| 321    | Vacuum Deposition | Thin Films | p         | 5 x 10 <sup>-3</sup>                                           | 10 <sup>2</sup>     | 278       |
| 322    | Vacuum Deposition | Thin Films | -         | -                                                              | -                   | 278       |
|        | Vacuum Deposition | Thin Films | p         | 0.3                                                            | 2 x 10 <sup>6</sup> | 279       |
| 323    | Vacuum Deposition | Thin Films | p         | 0.16                                                           | 10 <sup>4</sup>     | 278       |
| 324    | Vacuum Deposition | Thin Films | p         | 0.03                                                           | 10 <sup>4</sup>     | 279       |
| 325    | Vacuum Deposition | Thin Films | p         | 2.1 x 10 <sup>-4</sup>                                         | 10 <sup>2</sup>     | 278       |

a- Means calculated value

**Table S20. The performance statistics of five-ring-fused organic molecules listed in Fig. 28 of the main text.**

| Number | Method                   | Morphology        | Type             | Mobility<br>(cm <sup>2</sup> V <sup>-1</sup> s <sup>-1</sup> ) | On/off                  | Reference  |
|--------|--------------------------|-------------------|------------------|----------------------------------------------------------------|-------------------------|------------|
| 326    | Vacuum Deposition        | Thin Films        | p                | 5 x 10 <sup>-5</sup>                                           | 10 <sup>3</sup>         | 280        |
|        | Vacuum Deposition        | Thin Films        | p                | 0.3-0.45                                                       | -                       | 281        |
| 327    | <b>Vacuum Deposition</b> | <b>Thin Films</b> | <b>p</b>         | <b>1.4</b>                                                     | -                       | <b>282</b> |
|        | -                        | -                 | <b>Ambipolar</b> | <b>2.3 (p)<sup>a</sup></b><br><b>3.89 (n)<sup>a</sup></b>      | -                       | <b>283</b> |
| 328    | Vacuum Deposition        | Thin Films        | p                | 3.2 x 10 <sup>-3</sup>                                         | -                       | 284        |
| 329    | Vacuum Deposition        | Thin Films        | p                | 3 x 10 <sup>-5</sup>                                           | -                       | 284        |
| 330    | Vacuum Deposition        | Thin Films        | p                | (3-6) x 10 <sup>-3</sup>                                       | (2-5) x 10 <sup>3</sup> | 280        |
| 331    | Vacuum Deposition        | Thin Films        | p                | 1 x 10 <sup>-3</sup>                                           | (5-7) x 10 <sup>2</sup> | 280        |
| 332    | Vacuum Deposition        | Thin Films        | p                | 0.02-0.07                                                      | -                       | 285        |
|        | Drop Cast                | Thin Films        | n                | 3 x 10 <sup>-4</sup>                                           | -                       | 285        |
|        | -                        | -                 | Ambipolar        | 0.71 (p) <sup>a</sup><br>0.03 (n) <sup>a</sup>                 | -                       | 286        |
|        | -                        | -                 | Ambipolar        | 3.119 (p) <sup>a</sup><br>0.1149 (n) <sup>a</sup>              | -                       | 271        |

a- Means calculated value

**Table S21. The performance statistics of five-ring-fused organic molecules listed in Fig. 29 of the main text.**

| Number | Method                          | Morphology             | Type             | Mobility<br>(cm <sup>2</sup> V <sup>-1</sup> s <sup>-1</sup> )      | On/off                       | Reference  |
|--------|---------------------------------|------------------------|------------------|---------------------------------------------------------------------|------------------------------|------------|
| 333    | Vacuum Deposition               | Thin Films             | p                | -                                                                   | -                            | 287        |
| 334    | Vacuum Deposition               | Thin Films             | p                | (1-2) x 10 <sup>-5</sup>                                            | -                            | 287        |
| 335    | -                               | -                      | -                | -                                                                   | -                            | 288        |
|        | Vacuum Deposition               | Thin Films             | p                | 10 <sup>-5</sup>                                                    | -                            | 289        |
| 336    | -                               | -                      | Ambipolar        | 0.55 (p) <sup>a</sup><br>3.51 (n) <sup>a</sup>                      | -                            | 283        |
| 337    | Vacuum Deposition               | Thin Films             | p                | 0.13                                                                | -                            | 282        |
|        | -                               | -                      | <b>Ambipolar</b> | <b>0.45 (p)<sup>a</sup></b><br><b>3.39 (n)<sup>a</sup></b>          | -                            | <b>283</b> |
|        | <b>Physical Vapor Transport</b> | <b>Single Crystals</b> | <b>n</b>         | <b>3.39</b>                                                         | <b>1.08 x 10<sup>4</sup></b> | <b>290</b> |
| 338    | -                               | -                      | <b>Ambipolar</b> | <b>0.21 (p)<sup>a</sup></b><br><b>5.01 (n)<sup>a</sup></b>          | -                            | <b>286</b> |
|        | <b>Vacuum Deposition</b>        | <b>Thin Films</b>      | <b>p</b>         | <b>0.3-1.2</b>                                                      | -                            | <b>291</b> |
|        | -                               | -                      | <b>Ambipolar</b> | <b>0.3446 (p)<sup>a</sup></b><br><b>7.145 (n)<sup>a</sup></b>       | -                            | <b>271</b> |
| 339    | Vacuum Deposition               | Thin Films             | Ambipolar        | 0.02-0.05 (p)<br>(2-4) x 10 <sup>-4</sup> (n)                       | -                            | 285        |
|        | Drop Cast                       | Thin Films             | -                | -                                                                   | -                            | 285        |
|        | -                               | -                      | Ambipolar        | 5 x 10 <sup>-3</sup> (p) <sup>a</sup><br>1.24 (n) <sup>a</sup>      | -                            | 286        |
|        | -                               | -                      | <b>n</b>         | <b>1.92<sup>a</sup></b>                                             | -                            | <b>288</b> |
|        | -                               | -                      | Ambipolar        | 1.153 x 10 <sup>-2</sup> (p) <sup>a</sup><br>5.565 (n) <sup>a</sup> | -                            | 271        |

a- Means calculated value



**Table S22. The performance statistics of five-ring-fused organic molecules listed in Fig. 31 of the main text.**

| Number | Method                   | Morphology      | Type      | Mobility<br>( $\text{cm}^2 \text{V}^{-1} \text{s}^{-1}$ ) | On/off          | Reference |
|--------|--------------------------|-----------------|-----------|-----------------------------------------------------------|-----------------|-----------|
| 340    | Vacuum Deposition        | Thin Films      | p         | $2 \times 10^{-2}$                                        | $10^2$          | 292       |
| 341    | Vacuum Deposition        | Thin Films      | p         | $2 \times 10^{-5}$                                        | $10^2$          | 292       |
| 342    | Vacuum Deposition        | Thin Films      | p         | $1 \times 10^{-2}$                                        | $10^5$          | 292       |
| 343    | Physical Vapor Transport | Single Crystals | p         | $1 \times 10^{-4}$                                        | -               | 293       |
| 344    | -                        | -               | -         | -                                                         | -               | 293       |
| 345    | Physical Vapor Transport | Single Crystals | p         | $5 \times 10^{-4}$                                        | -               | 293       |
| 346    | Spin Coating             | Thin Films      | p         | 0.03                                                      | $10^4$ - $10^5$ | 294       |
| 347    | Spin Coating             | Thin Films      | p         | $9.3 \times 10^{-3}$                                      | $10^3$ - $10^4$ | 294       |
| 348    | Spin Coating             | Thin Films      | p         | 0.11                                                      | $10^3$ - $10^4$ | 294       |
| 349    | -                        | -               | Ambipolar | 0.06 (p) <sup>a</sup><br>0.02 (n) <sup>a</sup>            | -               | 286       |
|        | -                        | -               | Ambipolar | 0.2162 (p) <sup>a</sup><br>0.0448 (n) <sup>a</sup>        | -               | 271       |
| 350    | Vacuum Deposition        | Thin Films      | -         | -                                                         | -               | 285       |
|        | -                        | -               | -         | -                                                         | -               | 286       |
| 351    | Vacuum Deposition        | Thin Films      | p         | $(4-7) \times 10^{-4}$                                    | -               | 295       |
| 352    | Vacuum Deposition        | Thin Films      | -         | -                                                         | -               | 295       |
| 353    | -                        | -               | Ambipolar | 0.01 (p) <sup>a</sup><br>0.07 (n) <sup>a</sup>            | -               | 286       |
|        | Vacuum Deposition        | Thin Films      | p         | 0.3-0.7                                                   | $3 \times 10^5$ | 295       |

a- Means calculated value

**Table S23. The performance statistics of five-ring-fused organic molecules listed in Fig. 32 of the main text.**

| Number     | Method                   | Morphology             | Type             | Mobility (cm <sup>2</sup> V <sup>-1</sup> s <sup>-1</sup> ) | On/off                               | Reference  |
|------------|--------------------------|------------------------|------------------|-------------------------------------------------------------|--------------------------------------|------------|
| 354        | -                        | -                      | -                | -                                                           | -                                    | 271        |
| 355        | Vacuum Deposition        | Thin Films             | n                | (2-6) x 10 <sup>-5</sup>                                    | -                                    | 287        |
|            | -                        | -                      | -                | 2.49 <sup>a</sup>                                           | -                                    | 288        |
| 356        | Vacuum Deposition        | Thin Films             | n                | 0.05-0.12                                                   | -                                    | 287        |
|            | Vacuum Deposition        | Thin Films             | n                | 0.04-0.12                                                   | -                                    | 296        |
|            | -                        | -                      | -                | 0.79                                                        | -                                    | 288        |
| <b>357</b> | <b>Vacuum Deposition</b> | <b>Thin Films</b>      | <b>Ambipolar</b> | <b>0.05-0.22 (p)<br/>0.3-1.1 (n)</b>                        | -                                    | <b>291</b> |
| <b>358</b> | <b>Vacuum Deposition</b> | <b>Thin Films</b>      | <b>n</b>         | <b>1.0-3.3</b>                                              | -                                    | <b>285</b> |
|            | Drop Cast                | Thin Films             | n                | 3 x 10 <sup>-3</sup>                                        | -                                    | 285        |
|            | Spin Coating             | Thin Films             | n                | 5 x 10 <sup>-3</sup>                                        | 10 <sup>3</sup> -10 <sup>4</sup>     | 297        |
|            | <b>Drop Cast</b>         | <b>Single Crystals</b> | <b>n</b>         | <b>1.77</b>                                                 | -                                    | <b>298</b> |
|            | <b>Drop Cast</b>         | <b>Single Crystals</b> | <b>n</b>         | <b>1.2</b>                                                  | -                                    | <b>299</b> |
|            | -                        | -                      | n                | 0.72                                                        | -                                    | 288        |
|            | -                        | -                      | Ambipolar        | 0.02 (p) <sup>a</sup><br>0.25 (n) <sup>a</sup>              | -                                    | 286        |
|            | <b>Dip Coating</b>       | <b>Thin Films</b>      | <b>n</b>         | <b>11.1</b>                                                 | <b>10<sup>6</sup>-10<sup>7</sup></b> | <b>300</b> |
|            | <b>Drop Cast</b>         | <b>Thin Films</b>      | <b>n</b>         | <b>11.0</b>                                                 | <b>10<sup>6</sup>-10<sup>7</sup></b> | <b>300</b> |
|            | <b>Vacuum Deposition</b> | <b>Thin Films</b>      | <b>n</b>         | <b>6.8</b>                                                  | <b>10<sup>6</sup>-10<sup>7</sup></b> | <b>300</b> |
|            | Dip Coating              | Thin Films             | n                | 0.013                                                       | 10 <sup>4</sup>                      | 301        |
| <b>359</b> | <b>Drop Cast</b>         | <b>Thin Films</b>      | <b>n</b>         | <b>2.7</b>                                                  | -                                    | <b>302</b> |
| <b>360</b> | <b>Drop Cast</b>         | <b>Thin Films</b>      | <b>n</b>         | <b>2.3</b>                                                  | -                                    | <b>302</b> |
| <b>361</b> | <b>Dip Coating</b>       | <b>Thin Films</b>      | <b>n</b>         | <b>1.1</b>                                                  | -                                    | <b>302</b> |
| <b>362</b> | <b>Dip Coating</b>       | <b>Thin Films</b>      | <b>n</b>         | <b>2.7</b>                                                  | -                                    | <b>302</b> |
| <b>363</b> | <b>Drop Cast</b>         | <b>Thin Films</b>      | <b>n</b>         | <b>6.6</b>                                                  | -                                    | <b>302</b> |
| <b>364</b> | <b>Dip Coating</b>       | <b>Thin Films</b>      | <b>n</b>         | <b>27.8</b>                                                 | -                                    | <b>302</b> |
| 365        | Dip Coating              | Thin Films             | n                | 0.56                                                        | 10 <sup>5</sup>                      | 301        |
| 366        | Spin Coating             | Thin Films             | n                | 3.5 x 10 <sup>-4</sup>                                      | 10 <sup>3</sup> -10 <sup>4</sup>     | 297        |

a- Means calculated value

**Table S24. The performance statistics of five-ring-fused organic molecules listed in Fig. 34 of the main text.**

| Number | Method            | Morphology      | Type             | Mobility<br>(cm <sup>2</sup> V <sup>-1</sup> s <sup>-1</sup> ) | On/off | Reference  |
|--------|-------------------|-----------------|------------------|----------------------------------------------------------------|--------|------------|
| 367    | -                 | -               | -                | -                                                              | -      | 303        |
| 368    | -                 | -               | <b>Ambipolar</b> | <b>2.74 (p)<sup>a</sup></b><br><b>0.48 (n)<sup>a</sup></b>     | -      | <b>304</b> |
| 369    | -                 | -               | <b>Ambipolar</b> | <b>10.64 (p)<sup>a</sup></b><br><b>2.02 (n)<sup>a</sup></b>    | -      | <b>304</b> |
| 370    | Slow Cooling      | Thin Films      | -                | -                                                              | -      | 305        |
| 371    | Slow Cooling      | Thin Films      | -                | 0.29                                                           | -      | 305        |
| 372    | Slow Cooling      | Thin Films      | -                | 0.87                                                           | -      | 305        |
| 373    | Slow Cooling      | Thin Films      | -                | 0.28                                                           | -      | 305        |
|        | Slow Cooling      | Liquid Crystal  | p                | 10 <sup>-3 b</sup>                                             | -      | 306        |
|        | Slow Cooling      | Liquid Crystal  | p                | 1.7 x 10 <sup>-3 c</sup>                                       | -      | 306        |
| 374    | Vacuum Deposition | Thin Films      | n                | 10 <sup>-6</sup>                                               | -      | 307        |
|        | Spin Coating      | Thin Films      | -                | -                                                              | -      | 303        |
| 375    | -                 | -               | -                | -                                                              | -      | 308        |
| 376    | Spin Coating      | Thin Films      | n                | -                                                              | -      | 303        |
| 377    | Spin Coating      | Thin Films      | n                | -                                                              | -      | 303        |
| 378    | Spin Coating      | Thin Films      | n                | 8.3 x 10 <sup>-4</sup>                                         | -      | 303        |
| 379    | Spin Coating      | Thin Films      | n                | 1.58 x 10 <sup>-3</sup>                                        | -      | 303        |
| 380    | Spin Coating      | Thin Films      | n                | 1.36 x 10 <sup>-3</sup>                                        | -      | 303        |
| 381    | Spin Coating      | Thin Films      | n                | 1.45 x 10 <sup>-3</sup>                                        | -      | 303        |
| 382    | Spin Coating      | Thin Films      | n                | 5.13 x 10 <sup>-3</sup>                                        | -      | 303        |
| 383    | Spin Coating      | Thin Films      | n                | 2.34 x 10 <sup>-3</sup>                                        | -      | 303        |
| 384    | Slow Cooling      | Polycrystalline | n                | -                                                              | -      | 309        |
| 385    | Slow Cooling      | Polycrystalline | n                | 0.071                                                          | -      | 309        |
| 386    | Slow Cooling      | Amorphous       | n                | 0.021                                                          | -      | 309        |
| 387    | -                 | -               | -                | -                                                              | -      | 310        |
| 388    | -                 | -               | -                | -                                                              | -      | 310        |
| 389    | -                 | -               | -                | -                                                              | -      | 310        |
| 390    | -                 | -               | -                | -                                                              | -      | 310        |
| 391    | -                 | -               | -                | -                                                              | -      | 310        |
| 392    | -                 | -               | -                | -                                                              | -      | 310        |
| 393    | -                 | -               | -                | -                                                              | -      | 310        |
| 394    | -                 | -               | -                | 10 <sup>-3 d</sup>                                             | -      | 310        |
| 395    | Vacuum Deposition | Thin Films      | n                | 1.9 x 10 <sup>-4</sup>                                         | -      | 307        |

a- Means calculated value

b- Means time-of-flight (TOF) measurement

c- Means space-charge-limited current (SCLC) measurement

d- Means pulse-radiolysis time-resolved microwave conductivity technique

**Table S25. The performance statistics of five-ring-fused organic molecules listed in Fig. 35 of the main text.**

| Number | Method       | Morphology | Type | Mobility<br>( $\text{cm}^2 \text{V}^{-1} \text{s}^{-1}$ ) | On/off            | Reference |
|--------|--------------|------------|------|-----------------------------------------------------------|-------------------|-----------|
| 396    | Spin Coating | Thin Films | p    | 0.3                                                       | $10^6$ - $10^7$   | 311       |
|        | Spin Coating | Thin Films | p    | 0.16                                                      | -                 | 312       |
| 397    | Spin Coating | Thin Films | p    | 0.27                                                      | $10^6$            | 313       |
| 398    | Spin Coating | Thin Films | p    | 0.17                                                      | $10^6$            | 313       |
| 399    | Spin Coating | Thin Films | p    | 0.21                                                      | $10^6$            | 313       |
| 400    | Spin Coating | Thin Films | p    | 0.15                                                      | -                 | 312       |
| 401    | Spin Coating | Thin Films | p    | 0.33                                                      | -                 | 312       |
| 402    | Spin Coating | Thin Films | p    | 0.22                                                      | -                 | 312       |
| 403    | Spin Coating | Thin Films | p    | 0.67                                                      | $10^6$ - $10^7$   | 311       |
| 404    | Spin Coating | Thin Films | p    | 0.24                                                      | $10^6$            | 313       |
| 405    | Spin Coating | Thin Films | p    | $6.8 \times 10^{-3}$                                      | -                 | 314       |
| 406    | Spin Coating | Thin Films | p    | $5.3 \times 10^{-4}$                                      | -                 | 314       |
| 407    | Spin Coating | Thin Films | p    | $2.3 \times 10^{-4}$                                      | -                 | 314       |
| 408    | Spin Coating | Thin Films | -    | -                                                         | -                 | 314       |
| 409    | Spin Coating | Thin Films | p    | $1.4 \times 10^{-3}$                                      | $2.7 \times 10^5$ | 315       |
| 410    | Spin Coating | Thin Films | p    | $1.54 \times 10^{-2}$                                     | -                 | 316       |
| 411    | Spin Coating | Thin Films | p    | $5.62 \times 10^{-3}$                                     | -                 | 316       |

**Table S26. The performance statistics of five-ring-fused organic molecules listed in Fig. 36 of the main text.**

| Number | Method            | Morphology | Type      | Mobility<br>( $\text{cm}^2 \text{V}^{-1} \text{s}^{-1}$ )                        | On/off                                     | Reference |
|--------|-------------------|------------|-----------|----------------------------------------------------------------------------------|--------------------------------------------|-----------|
| 412    | Vacuum Deposition | Thin Films | Ambipolar | 0.023 (p)<br>0.043 (n)                                                           | $3 \times 10^3$ (p)<br>$2 \times 10^4$ (n) | 317       |
| 413    | Vacuum Deposition | Thin Films | p         | 0.05                                                                             | $4 \times 10^4$                            | 317       |
|        | Vacuum Deposition | Thin Films | p         | $0.04 \pm 0.01$                                                                  | -                                          | 318       |
| 414    | Vacuum Deposition | Thin Films | Ambipolar | 0.02 (p)<br>0.22 (n)                                                             | $5 \times 10^3$ (p)<br>$10^4$ (n)          | 317       |
| 415    | Vacuum Deposition | Thin Films | n         | 0.33                                                                             | -                                          | 318       |
| 416    | Spin Coating      | Thin Films | n         | 0.33                                                                             | $10^2$                                     | 319       |
|        | Blade Coating     | Thin Films | n         | 0.49                                                                             | $10^2$ - $10^3$                            | 319       |
| 417    | Blade Coating     | Thin Films | n         | 0.13                                                                             | $10^4$                                     | 320       |
| 418    | Blade Coating     | Thin Films | n         | 0.03                                                                             | $10^3$                                     | 320       |
| 419    | Spin Coating      | Thin Films | p         | $5.4 \times 10^{-4}$                                                             | $10^4$                                     | 321       |
| 420    | Spin Coating      | Thin Films | p         | $1.1 \times 10^{-4}$                                                             | $10^3$                                     | 321       |
| 421    | Spin Coating      | Thin Films | Ambipolar | $5.04 \times 10^{-4}$ (p)<br>$6.72 \times 10^{-4}$ (n)                           | -                                          | 322       |
| 422    | Spin Cast         | Thin Films | n         | 0.15                                                                             | -                                          | 323       |
| 423    | Spin Cast         | Thin Films | Ambipolar | $2.4 \times 10^{-3}$ (p)<br>$1.5 \times 10^{-2}$ (n)                             | -                                          | 324       |
| 424    | Spin Cast         | Thin Films | n         | 0.15                                                                             | $\sim 5 \times 10^5$                       | 324       |
| 425    | Spin Cast         | Thin Films | n         | $4.4 \times 10^{-4}$                                                             | -                                          | 325       |
| 426    | Spin Coating      | Thin Films | Ambipolar | $8.3 \times 10^{-5}$ (p) <sup>a</sup><br>$6.6 \times 10^{-5}$ (n) <sup>a</sup>   | -                                          | 326       |
| 427    | Spin Coating      | Thin Films | Ambipolar | $1.8 \times 10^{-5}$ (p) <sup>a</sup><br>$3 \times 10^{-6}$ (n) <sup>a</sup>     | -                                          | 326       |
| 428    | Spin Coating      | Thin Films | n         | $2.43 \times 10^{-4}$                                                            | -                                          | 327       |
| 429    | Spin Coating      | Thin Films | n         | $6.02 \times 10^{-4}$                                                            | -                                          | 327       |
| 430    | Spin Coating      | Thin Films | n         | $1.6 \times 10^{-5}$ (n) <sup>a</sup>                                            | -                                          | 326       |
| 431    | Spin Coating      | Thin Films | Ambipolar | $3.69 \times 10^{-4}$ (p) <sup>a</sup><br>$2.43 \times 10^{-4}$ (n) <sup>a</sup> | -                                          | 328       |
| 432    | Spin Coating      | Thin Films | Ambipolar | $5.32 \times 10^{-4}$ (p) <sup>a</sup><br>$4.92 \times 10^{-4}$ (n) <sup>a</sup> | -                                          | 328       |
| 433    | Spin Coating      | Thin Films | Ambipolar | $6.03 \times 10^{-4}$ (p) <sup>a</sup><br>$6.02 \times 10^{-4}$ (n) <sup>a</sup> | -                                          | 328       |
| 434    | Spin Coating      | Thin Films | n         | $1.35 \times 10^{-4}$ <sup>a</sup>                                               | -                                          | 329       |
| 435    | Spin Coating      | Thin Films | n         | $2.79 \times 10^{-4}$ <sup>a</sup>                                               | -                                          | 329       |
| 436    | Spin Coating      | Thin Films | -         | -                                                                                | -                                          | 329       |

a- Means space-charge-limited current (SCLC) measurement

**Table S27. The performance statistics of five-ring-fused organic molecules listed in Fig. 37 of the main text.**

| Number | Method                       | Morphology        | Type     | Mobility<br>( $\text{cm}^2 \text{V}^{-1} \text{s}^{-1}$ ) | On/off                               | Reference |
|--------|------------------------------|-------------------|----------|-----------------------------------------------------------|--------------------------------------|-----------|
| 437    | <b>Spin Coating</b>          | <b>Thin Films</b> | <b>p</b> | <b>0.8-1.2</b>                                            | <b><math>10^3</math></b>             | 330       |
|        | <b>Spin Coating</b>          | <b>Thin Films</b> | <b>p</b> | <b>3.6</b>                                                | -                                    | 331       |
|        | <b>Spin Coating</b>          | <b>Thin Films</b> | <b>p</b> | <b>1.5-2.5</b>                                            | -                                    | 332       |
|        | Spin Coating                 | Thin Films        | p        | 0.068                                                     | $>10^3$                              | 333       |
|        | <b>Spin Coating</b>          | <b>Thin Films</b> | <b>p</b> | <b><math>1.38 \pm 0.19</math></b>                         | -                                    | 334       |
|        | <b>In-Situ Rubber Matrix</b> | <b>Thin Films</b> | <b>p</b> | <b>1.66</b>                                               | -                                    | 335       |
| 438    | Spin Coating                 | Thin Films        | p        | 0.2                                                       | $10^6$                               | 330       |
| 439    | <b>Spin Coating</b>          | <b>Thin Films</b> | <b>p</b> | <b>5.01</b>                                               | <b><math>2 \times 10^6</math></b>    | 336       |
| 440    | Spin Coating                 | Thin Films        | p        | 0.012                                                     | $4.98 \times 10^5$                   | 337       |
| 441    | <b>Spin Coating</b>          | <b>Thin Films</b> | <b>p</b> | <b>5.26</b>                                               | <b><math>1.57 \times 10^6</math></b> | 337       |
| 442    | Spin Coating                 | Thin Films        | p        | $1.04 \times 10^{-3}$                                     | $3.85 \times 10^4$                   | 337       |

**Table S28. The performance statistics of five-ring-fused organic molecules listed in Fig. 38 of the main text.**

| Number | Method            | Morphology | Type | Mobility<br>( $\text{cm}^2 \text{V}^{-1} \text{s}^{-1}$ )                      | On/off          | Reference |
|--------|-------------------|------------|------|--------------------------------------------------------------------------------|-----------------|-----------|
| 443    | Vacuum Deposition | Thin Films | n    | $2.7 \times 10^{-4}$                                                           | $2 \times 10^4$ | 53        |
| 444    | Vacuum Deposition | Thin Films | n    | $8.8 \times 10^{-4}$                                                           | $2 \times 10^5$ | 53        |
|        | Vacuum Deposition | Thin Films | n    | $1.1 \times 10^{-2}$                                                           | $10^6$          | 338       |
| 445    | Vacuum Deposition | Thin Films | n    | $2.2 \times 10^{-4}$                                                           | $8 \times 10^5$ | 338       |
| 446    | Vacuum Deposition | Thin Films | n    | $1.4 \times 10^{-6}$                                                           | $2 \times 10^2$ | 338       |
| 447    | Vacuum Deposition | Thin Films | n    | $7.4 \times 10^{-8}$                                                           | 90              | 338       |
| 448    | Vacuum Deposition | Thin Films | n    | $9.2 \times 10^{-3}$                                                           | $2 \times 10^6$ | 338       |
|        | Drop Cast         | Thin Films | n    | $1.7 \times 10^{-5}$                                                           | $8 \times 10^2$ | 338       |
| 449    | Vacuum Deposition | Thin Films | n    | $1.6 \times 10^{-5}$                                                           | $2 \times 10^3$ | 338       |
| 450    | Vacuum Deposition | Thin Films | n    | $1.2 \times 10^{-4}$                                                           | $10^4$          | 338       |
|        | Drop Cast         | Thin Films | n    | $5.3 \times 10^{-5}$                                                           | $10^2$          | 338       |
| 451    | Vacuum Deposition | Thin Films | n    | $1.1 \times 10^{-2}$                                                           | $10^6$          | 338       |
| 452    | -                 | -          |      | $2.0 \times 10^{-3}$ (p) <sup>a</sup><br>$8.3 \times 10^{-5}$ (n) <sup>a</sup> | -               | 46        |

a- Means Time-of-Flight measurement

**Table S29. The performance statistics of five-ring-fused organic molecules listed in Fig. 39 of the main text.**

| Number | Method            | Morphology      | Type | Mobility<br>( $\text{cm}^2 \text{V}^{-1} \text{s}^{-1}$ ) | On/off            | Reference |
|--------|-------------------|-----------------|------|-----------------------------------------------------------|-------------------|-----------|
| 453    | Vacuum Deposition | Thin Films      | p    | -                                                         | -                 | 339       |
| 454    | Drop Cast         | Single Crystals | p    | 0.75                                                      | $4.2 \times 10^4$ | 340       |
|        | Vacuum Deposition | Thin Films      | p    | 0.058                                                     | $10^5$            | 340       |
| 455    | Vacuum Deposition | Thin Films      | p    | $7.8 \times 10^{-6}$                                      | $10^6$            | 340       |
| 456    | Spin Coating      | Thin Films      | p    | -                                                         | -                 | 341       |
| 457    | Vacuum Deposition | Thin Films      | p    | 0.012                                                     | $10^5$            | 339       |
| 458    | Vacuum Deposition | Thin Films      | p    | $1.3 \times 10^{-6}$                                      | $10^4$            | 340       |
| 459    | Vacuum Deposition | Thin Films      | p    | -                                                         | -                 | 339       |
|        | Vacuum Deposition | Thin Films      | -    | -                                                         | -                 | 340       |



**Table S30. The performance statistics of five-ring-fused organic molecules listed in Fig. 40 of the main text.**

| Number | Method       | Morphology | Type | Mobility<br>( $\text{cm}^2 \text{V}^{-1} \text{s}^{-1}$ ) | On/off | Reference |
|--------|--------------|------------|------|-----------------------------------------------------------|--------|-----------|
| 460    | Spin Coating | Thin Films | p    | $6.4 \times 10^{-3}$                                      | $10^3$ | 342       |
| 461    | Spin Coating | Thin Films | p    | 0.022                                                     | $10^4$ | 342       |
| 462    | Spin Coating | Thin Films | p    | 0.035                                                     | $10^4$ | 342       |
| 463    | Spin Coating | Thin Films | p    | 0.02                                                      | -      | 343       |
| 464    | Spin Coating | Thin Films | p    | 0.02                                                      | $10^4$ | 344       |
| 465    | Spin Coating | Thin Films | p    | 0.07                                                      | $10^4$ | 344       |
| 466    | Spin Coating | Thin Films | p    | $3 \times 10^{-3}$                                        | -      | 343       |
| 467    | Spin Coating | Thin Films | p    | 0.01                                                      | $10^3$ | 344       |
| 468    | Spin Coating | Thin Films | p    | $1 \times 10^{-3}$                                        | $10^3$ | 344       |
| 469    | Spin Coating | Thin Films | p    | $3 \times 10^{-3}$                                        | -      | 343       |

**Table S31. The performance statistics of five-ring-fused organic molecules listed in Fig. 41 of the main text.**

| Number | Method            | Morphology | Type | Mobility<br>( $\text{cm}^2 \text{V}^{-1} \text{s}^{-1}$ ) | On/off | Reference |
|--------|-------------------|------------|------|-----------------------------------------------------------|--------|-----------|
| 470    | -                 | -          | -    | 0.05 <sup>a</sup>                                         | -      | 345       |
| 471    | Vacuum Deposition | Thin Films | p    | $2.9 \times 10^{-6}$                                      | $10^5$ | 345       |
| 472    | -                 | -          | -    | 0.76 <sup>a</sup>                                         | -      | 345       |
| 473    | Vacuum Deposition | Thin Films | p    | $6.2 \times 10^{-6}$                                      | $10^4$ | 345       |
|        | -                 | -          | p    | $8.7 \times 10^{-2}$ <sup>a</sup>                         | -      | 345       |
| 474    | -                 | -          | p    | 0.5 <sup>a</sup>                                          | -      | 345       |
| 475    | Vacuum Deposition | Thin Films | p    | $2.5 \times 10^{-6}$                                      | $10^4$ | 345       |

a- Means calculated mobility

**Table S32. The performance statistics of five-ring-fused organic molecules listed in Fig. 42 of the main text.**

| Number     | Method                          | Morphology             | Type      | Mobility<br>(cm <sup>2</sup> V <sup>-1</sup> s <sup>-1</sup> )                       | On/off                                   | Referenc<br>e |
|------------|---------------------------------|------------------------|-----------|--------------------------------------------------------------------------------------|------------------------------------------|---------------|
| 476        | Dip Coating                     | Thin Films             | p         | 0.025                                                                                | -                                        | 346           |
| 477        | Drop Casting                    | Thin Films             | p         | 5 x 10 <sup>-5</sup>                                                                 | -                                        | 347           |
| 478        | Drop Casting                    | Thin Films             | p         | 6 x 10 <sup>-4</sup>                                                                 | -                                        | 347           |
| 479        | Drop Casting                    | Thin Films             | p         | 0.19-0.76                                                                            | -                                        | 347           |
| <b>480</b> | Vacuum Deposition               | Thin Films             | p         | 0.34                                                                                 | 10 <sup>6</sup> -10 <sup>7</sup>         | 348           |
|            | <b>Physical Vapor Transport</b> | <b>Single Crystals</b> | <b>p</b>  | <b>0.01-3.6</b>                                                                      | <b>10<sup>4</sup>-8x10<sup>6</sup></b>   | <b>349</b>    |
| 481        | Vacuum Deposition               | Thin Films             | p         | 1.77 x 10 <sup>-4</sup>                                                              | 10 <sup>4</sup> -10 <sup>5</sup>         | 348           |
|            | Physical Vapor Transport        | Single Crystals        | p         | 10 <sup>-4</sup> -0.014                                                              | 6 x 10 <sup>2</sup> -10 <sup>4</sup>     | 349           |
| 482        | Vacuum Deposition               | Thin Films             | p         | 3.01x10 <sup>-4</sup>                                                                | (1-5) x 10 <sup>5</sup>                  | 348           |
|            | Physical Vapor Transport        | Single Crystals        | p         | 3x10 <sup>-4</sup> -0.4                                                              | 2 x 10 <sup>3</sup> -9 x 10 <sup>5</sup> | 349           |
| 483        | Vacuum Deposition               | Thin Films             | -         | -                                                                                    | -                                        | 350           |
| 484        | Vacuum Deposition               | Thin Films             | -         | -                                                                                    | -                                        | 350           |
| 485        | Vacuum Deposition               | Thin Films             | -         | -                                                                                    | -                                        | 350           |
| 486        | Vacuum Deposition               | Thin Films             | n         | 0.2                                                                                  | -                                        | 350           |
| 487        | Vacuum Deposition               | Thin Films             | n         | 0.42                                                                                 | -                                        | 350           |
| 488        | Vacuum Deposition               | Thin Films             | -         | -                                                                                    | -                                        | 350           |
| 489        | Spin Coating                    | Thin Films             | n         | -                                                                                    | -                                        | 351           |
| 490        | Spin Coating                    | Thin Films             | n         | 1.3 x 10 <sup>-5</sup>                                                               | 10 <sup>5</sup>                          | 351           |
| 491        | Spin Coating                    | Thin Films             | n         | 5.3 x 10 <sup>-3</sup>                                                               | 10 <sup>6</sup>                          | 351           |
| 492        | Spin Coating                    | Thin Films             | n         | -                                                                                    | -                                        | 351           |
| 493        | Spin Coating                    | Thin Films             | n         | 4.8 x 10 <sup>-4</sup>                                                               | 10 <sup>2</sup>                          | 351           |
| 494        | Spin Coating                    | Thin Films             | p         | 0.05                                                                                 | 10 <sup>6</sup>                          | 352           |
| 495        | Spin Coating                    | Thin Films             | p         | 0.012                                                                                | 10 <sup>4</sup>                          | 352           |
| 496        | Spin Coating                    | Thin Films             | p         | 0.05                                                                                 | -                                        | 353           |
| 497        | Spin Coating                    | Thin Films             | p         | 0.4                                                                                  | -                                        | 353           |
| 498        | -                               | -                      | Ambipolar | 2.77 x 10 <sup>-4</sup> (p) <sup>a</sup><br>2.81 x 10 <sup>-4</sup> (n) <sup>a</sup> | -                                        | 354           |
| 499        | Vacuum Deposition               | Thin Films             | n         | 0.39                                                                                 | 10 <sup>6</sup>                          | 355           |
| 500        | Vacuum Deposition               | Thin Films             | p         | 1.3 x 10 <sup>-3</sup>                                                               | -                                        | 356           |
| 501        | Spin Coating                    | Thin Films             | p         | 0.062                                                                                | 3 x 10 <sup>3</sup>                      | 341           |
| 502        | Spin Coating                    | Thin Films             | -         | -                                                                                    | -                                        | 341           |
| <b>503</b> | <b>Dip Coating</b>              | <b>Thin Films</b>      | <b>p</b>  | <b>3.8</b>                                                                           | <b>10<sup>5</sup></b>                    | <b>242</b>    |
| <b>504</b> | <b>Dip Coating</b>              | <b>Thin Films</b>      | <b>p</b>  | <b>3.0</b>                                                                           | <b>10<sup>6</sup></b>                    | <b>242</b>    |
| 505        | Dip Coating                     | Thin Films             | p         | 0.64                                                                                 | 10 <sup>4</sup>                          | 242           |
| 506        | Spin Coating                    | Thin Films             | n         | 2.4 x 10 <sup>-6 a</sup>                                                             | -                                        | 357           |
| 507        | Spin Coating                    | Thin Films             | n         | 9.88 x 10 <sup>-6 a</sup>                                                            | -                                        | 357           |
| 508        | Spin Coating                    | Thin Films             | n         | 3.88 x 10 <sup>-7 a</sup>                                                            | -                                        | 357           |

a- Means SCLC measurement

**Table S33. The performance statistics of five-ring-fused organic molecules listed in Fig. 43 of the main text.**

| Number | Method       | Morphology | Type      | Mobility<br>( $\text{cm}^2 \text{V}^{-1} \text{s}^{-1}$ ) | On/off                   | Reference |
|--------|--------------|------------|-----------|-----------------------------------------------------------|--------------------------|-----------|
| 509    | Spin Coating | Thin Films | p         | $8 \times 10^{-3}$                                        | -                        | 358       |
| 510    | Spin Coating | Thin Films | Ambipolar | 0.65 (p); 0.1 (n)                                         | -                        | 358       |
| 511    | Spin Coating | Thin Films | p         | 0.014                                                     | $10^4$                   | 359       |
| 512    | Spin Coating | Thin Films | p         | $4 \times 10^{-3}$                                        | $10^3$                   | 359       |
| 513    | Spin Coating | Thin Films | p         | 0.28                                                      | $10^3$                   | 359       |
| 514    | Spin Coating | Thin Films | p         | 0.19                                                      | $10^4$                   | 359       |
| 515    | Spin Coating | Thin Films | n         | 0.11                                                      | $10^4$                   | 360       |
| 516    | Spin Coating | Thin Films | Ambipolar | 0.015 (p)<br>0.15 (n)                                     | $10^4$ (p)<br>$10^3$ (n) | 360       |
| 517    | Spin Coating | Thin Films | n         | 0.4                                                       | $10^6$                   | 360       |
| 518    | Spin Coating | Thin Films | n         | $4.5 \times 10^{-3}$                                      | $\sim 10^4$              | 361       |
| 519    | Spin Coating | Thin Films | n         | 0.013                                                     | $\sim 10^4$              | 361       |

**Table S34. The performance statistics of five-ring-fused organic molecules listed in Fig. 44 of the main text.**

| Number | Name             | Molecular Structure                                                                 | HOMO (eV) | LUMO (eV) | Bandgap (eV) | Reference |
|--------|------------------|-------------------------------------------------------------------------------------|-----------|-----------|--------------|-----------|
|        | Pentacene        | 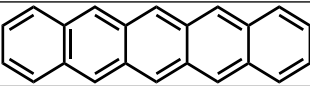   | -5.0      | -3.2      | 1.8          | 362       |
| 056    | -                |    | -5.17     | -3.21     | 1.96         | 68        |
| 072    | ABT              |    | -5.35     | -2.85     | 2.5          | 78        |
| 079    | DNT-V            |    | -5.68     | -2.73     | 2.95         | 82        |
| 083    | DNT-W            |    | -5.87     | -         | -            | 84        |
| 085    | <i>anti</i> -ADT |   | -5.1      | -2.59     | 2.21         | 87        |
| 086    | <i>syn</i> -ADT  |  | -5.1      | -2.59     | 2.21         | 87        |
| 128    | PDT-2            |  | -5.49     | -1.32     | 4.17         | 189       |
| 130    | PDT-1            |  | -5.63     | -1.19     | 4.44         | 189       |
| 152    | -                |  | -5.8      | -2.5      | 3.3          | 197       |
| 156    | ATT              |  | -5.3      | -2.78     | 2.52         | 201       |
| 167    | DBTDT            |  | -5.6      | -2.14     | 3.46         | 203       |
| 169    | BBTT             |  | -5.64     | -1.87     | 3.77         | 207       |

|     |                   |                                                                                     |        |        |       |     |
|-----|-------------------|-------------------------------------------------------------------------------------|--------|--------|-------|-----|
| 171 | <i>anti</i> -TBBT | 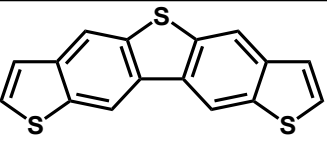   | -5.6   | -2.5   | 3.1   | 209 |
| 173 | <i>syn</i> -TBBT  |    | -5.6   | -2.3   | 3.3   | 209 |
| 200 | PTA               |    | -5.33  | -2.04  | 3.29  | 225 |
| 221 | DNF-V             |    | -5.56  | -      | -     | 236 |
| 224 | DNF-W             |    | -5.85  | -      | -     | 84  |
| 225 | DNF-U             |   | -5.71  | -      | -     | 238 |
| 226 | <i>anti</i> -ADF  |  | -5.1   | -2.5   | 2.6   | 89  |
| 232 | DNS-W             |  | -5.81  | -      | -     | 84  |
| 234 | <i>anti</i> -ADS  |  | -5     | -2.6   | 2.4   | 89  |
| 236 | -                 |  | -5.6   | -2.4   | 3.2   | 197 |
| 240 | -                 |  | -5.12  | -2.15  | 2.97  | 248 |
| 351 | -                 |  | -5.354 | -1.995 | 3.359 | 295 |

|     |   |                                                                                     |        |        |       |     |
|-----|---|-------------------------------------------------------------------------------------|--------|--------|-------|-----|
| 340 | - | 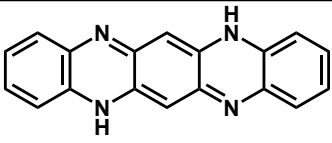   | -5.21  | -      | -     | 292 |
| 354 | - |    | -5.651 | -3.318 | 2.333 | 271 |
| 453 | - |    | -5.84  | -2.13  | 3.71  | 339 |
| 457 | - |    | -5.3   | -1.79  | 3.51  | 339 |
| 480 | - |    | -5.44  | -3.03  | 2.41  | 348 |
| 483 | - |   | -6.59  | -3.92  | 2.67  | 350 |
| 500 | - |  | -5.5   | -3     | 2.5   | 356 |

## Reference

1. A. N. Aleshin, J. Y. Lee, S. W. Chu, J. S. Kim and Y. W. Park, *Appl. Phys. Lett.*, 2004, **84**, 5383-5385.
2. V. Y. Butko, X. Chi and A. P. Ramirez, *Solid State Commun.*, 2003, **128**, 431-434.
3. R. W. I. de Boer, T. M. Klapwijk and A. F. Morpurgo, *Appl. Phys. Lett.*, 2003, **83**, 4345-4347.
4. R. W. I. de Boer, M. Jochemsen, T. M. Klapwijk, A. F. Morpurgo, J. Niemax, A. K. Tripathi and J. Pflaum, *J. Appl. Phys.*, 2004, **95**, 1196-1202.
5. C. Goldmann, S. Haas, C. Krellner, K. P. Pernstich, D. J. Gundlach and B. Batlogg, *J. Appl. Phys.*, 2004, **96**, 2080-2086.
6. H. E. Katz, C. Kloc, V. Sundar, J. Zaumseil, A. L. Briseno and Z. Bao, *J. Mater. Res.*, 2004, **19**, 1995-1998.
7. C. R. Newman, R. J. Chesterfield, J. A. Merlo and C. D. Frisbie, *Appl. Phys. Lett.*, 2004, **85**, 422-424.
8. T. Nisikawa, N. Moriguchi, T. Anezaki, A. Unno, M. Tachibana and K. Kojima, *Jpn. J. Appl. Phys.*, 2006, **45**, 5238-5240.
9. O. Ostroverkhova, D. G. Cooke, F. A. Hegmann, J. E. Anthony, V. Podzorov, M. E. Gershenson, O. D. Jurchescu and T. T. M. Palstra, *Appl. Phys. Lett.*, 2006, **88**, 162101.
10. T. H. Kim, J. H. Lee, J. H. Kim and C. Seoul, *Mater. Res. Soc. Symp. Proc.*, 2006, **920**, 39-42.
11. M. J. Panzer and C. D. Frisbie, *Appl. Phys. Lett.*, 2006, **88**, 203504.
12. C. Reese, W.-J. Chung, M.-m. Ling, M. Roberts and Z. Bao, *Appl. Phys. Lett.*, 2006, **89**, 202108.
13. T. Takahashi, T. Takenobu, J. Takeya and Y. Iwasa, *Adv. Funct. Mater.*, 2007, **17**, 1623-1628.
14. Y. Xia, V. Kalihari, C. D. Frisbie, N. K. Oh and J. A. Rogers, *Appl. Phys. Lett.*, 2007, **90**, 162106.
15. S. Terao, T. Hirai, N. Morita, H. Maeda, K. Kojima and M. Tachibana, *J. Appl. Phys.*, 2010, **108**, 124511-124514.
16. C.-T. Chien, C.-C. Lin, M. Watanabe, Y.-D. Lin, T.-H. Chao, T.-c. Chiang, X.-H. Huang, Y.-S. Wen, C.-H. Tu, C.-H. Sun and T. J. Chow, *J. Mater. Chem.*, 2012, **22**, 13070-13075.
17. T. P. I. Saragi and T. Reichert, *Appl. Phys. Lett.*, 2012, **100**, 073304.
18. L. A. Morrison, D. Stanfield, M. Jenkins, A. A. Baronov, D. L. Patrick and J. M. Leger, *Org. Electron.*, 2016, **33**, 269-273.
19. V. Y. Butko, X. Chi, D. V. Lang and A. P. Ramirez, *Appl. Phys. Lett.*, 2003, **83**, 4773-4775.
20. J. Takeya, C. Goldmann, S. Haas, K. P. Pernstich, B. Ketterer and B. Batlogg, *J. Appl. Phys.*, 2003, **94**, 5800-5804.
21. O. D. Jurchescu, J. Baas and T. T. M. Palstra, *Appl. Phys. Lett.*, 2004, **84**, 3061-3063.
22. J. Takeya, T. Nishikawa, T. Takenobu, S. Kobayashi, Y. Iwasa, T. Mitani, C. Goldmann, C. Krellner and B. Batlogg, *Appl. Phys. Lett.*, 2004, **85**, 5078-5080.
23. V. K. Thorsmølle, R. D. Averitt, X. Chi, D. J. Hilton, D. L. Smith, A. P. Ramirez and A. J. Taylor, *Appl. Phys. Lett.*, 2004, **84**, 891-893.
24. T. Minari, T. Nemoto and S. Isoda, *J. Appl. Phys.*, 2004, **96**, 769-772.
25. L. B. Roberson, J. Kowalik, L. M. Tolbert, C. Kloc, R. Zeis, X. Chi, R. Fleming and C. Wilkins, *J. Am. Chem. Soc.*, 2005, **127**, 3069-3075.
26. A. L. Briseno, S. C. B. Mannsfeld, M. M. Ling, S. Liu, R. J. Tseng, C. Reese, M. E. Roberts, Y. Yang, F. Wudl and Z. Bao, *Nature*, 2006, **444**, 913-917.
27. J. Y. Lee, S. Roth and Y. W. Park, *Appl. Phys. Lett.*, 2006, **88**, 252106.
28. T. Minari, T. Nemoto and S. Isoda, *J. Appl. Phys.*, 2006, **99**, 034506.
29. O. D. Jurchescu, M. Popinciuc, B. J. van Wees and T. T. M. Palstra, *Adv. Mater.*, 2007, **19**, 688-692.
30. S. Liu, A. L. Briseno, S. C. B. Mannsfeld, W. You, J. Locklin, H. W. Lee, Y. Xia and Z. Bao, *Adv. Funct. Mater.*, 2007, **17**, 2891-2896.
31. T. Takenobu, K. Watanabe, Y. Yomogida, H. Shimotani and Y. Iwasa, *Appl. Phys. Lett.*, 2008, **93**, 073301-073303.
32. Y. Kimura, M. Niwano, N. Ikuma, K. Goushi and K. Itaya, *Langmuir*, 2009, **25**, 4861-4863.
33. H. Yang, C. Yang, S. H. Kim, M. Jang and C. E. Park, *ACS Appl. Mater. Interfaces*, 2010, **2**, 391-396.
34. R. Häusermann and B. Batlogg, *Appl. Phys. Lett.*, 2011, **99**, 083303.
35. T. Uemura, M. Yamagishi, J. Soeda, Y. Takatsuki, Y. Okada, Y. Nakazawa and J. Takeya, *Phys. Rev. B*, 2012, **85**, 035313.



36. Y. Takeyama, S. Ono and Y. Matsumoto, *Appl. Phys. Lett.*, 2012, **101**, 083303.
37. M. Watanabe, Y. J. Chang, S. W. Liu, T. H. Chao, K. Goto, M. M. Islam, C. H. Yuan, Y. T. Tao, T. Shinmyozu and T. J. Chow, *Nat. Chem.*, 2012, **4**, 574-578.
38. T. J. Sonnonstine and A. M. Hermann, *J. Chem. Phys.*, 1974, **60**, 1335-1340.
39. T. P. Nguyen and J. H. Shim, *Phys. Chem. Chem. Phys.*, 2016, **18**, 13888-13896.
40. N. Kawai, R. Eguchi, H. Goto, K. Akaike, Y. Kajii, T. Kambe, A. Fujiwara and Y. Kubozono, *J. Phys. Chem. C*, 2012, **116**, 7983-7988.
41. Q. Xin, S. Duhm, F. Bussolotti, K. Akaike, Y. Kubozono, H. Aoki, T. Kosugi, S. Kera and N. Ueno, *Phys. Rev. Lett.*, 2012, **108**, 226401.
42. X. He, R. Eguchi, H. Goto, E. Uesugi, S. Hamao, Y. Takabayashi and Y. Kubozono, *Org. Electron.*, 2013, **14**, 1673-1682.
43. C.-C. Hsiao, Y.-K. Lin, C.-J. Liu, T.-C. Wu and Y.-T. Wu, *Adv. Synth. Catal.*, 2010, **352**, 3267-3274.
44. C. Py, T. C. Gorjanc, T. Hadizad, J. Zhang and Z. Y. Wang, *J. Vac. Sci. Technol. A*, 2006, **24**, 654-656.
45. J. P. M. Serbena, I. A. Hümmelgen, T. Hadizad and Z. Y. Wang, *Small*, 2006, **2**, 372-374.
46. Y. Park, J. H. Lee, D. H. Jung, S. H. Liu, Y. H. Lin, L. Y. Chen, C. C. Wu and J. Park, *J. Mater. Chem.*, 2010, **20**, 5930-5936.
47. D. T. Chase, A. G. Fix, S. J. Kang, B. D. Rose, C. D. Weber, Y. Zhong, L. N. Zakharov, M. C. Lonergan, C. Nuckolls and M. M. Haley, *J. Am. Chem. Soc.*, 2012, **134**, 10349-10352.
48. L. L. Feng, H. L. Dong, Q. Y. Li, W. G. Zhu, G. G. Qiu, S. Ding, Y. Li, M. A. Christensen, C. R. Parker, Z. M. Wei, M. B. Nielsen and W. P. Hu, *Sci. China-Mater.*, 2017, **60**, 75-82.
49. H. Usta, A. Facchetti and T. J. Marks, *J. Am. Chem. Soc.*, 2008, **130**, 8580-8581.
50. S. A. DiBenedetto, D. L. Frattarelli, A. Facchetti, M. A. Ratner and T. J. Marks, *J. Am. Chem. Soc.*, 2009, **131**, 11080-11090.
51. H. Usta, C. Risko, Z. Wang, H. Huang, M. K. Delimeroglu, A. Zhukhovitskiy, A. Facchetti and T. J. Marks, *J. Am. Chem. Soc.*, 2009, **131**, 5586-5608.
52. R. Ozdemir, D. Choi, M. Ozdemir, G. Kwon, H. Kim, U. Sen, C. Kim and H. Usta, *J. Mater. Chem. C*, 2017, **5**, 2368-2379.
53. T. Nakagawa, D. Kumaki, J.-i. Nishida, S. Tokito and Y. Yamashita, *Chem. Mater.*, 2008, **20**, 2615-2617.
54. H. Usta, A. Facchetti and T. J. Marks, *Acc. Chem. Res.*, 2011, **44**, 501-510.
55. Z.-P. Fan, X.-Y. Li, X.-E. Luo, X. Fei, B. Sun, L.-C. Chen, Z.-F. Shi, C.-L. Sun, X. Shao and H.-L. Zhang, *Adv. Funct. Mater.*, 2017, **27**, 1702318.
56. M. Ozdemir, D. Choi, G. Kwon, Y. Zorlu, H. Kim, M.-G. Kim, S. Seo, U. Sen, M. Citir, C. Kim and H. Usta, *RSC Adv.*, 2016, **6**, 212-226.
57. B. J. Kim, Y.-I. Park, H. J. Kim, K. Ahn, D. R. Lee, D. H. Kim, S.-Y. Oh, J.-W. Park and J. H. Cho, *J. Mater. Chem.*, 2012, **22**, 14617-14623.
58. Y. Miyata, T. Minari, T. Nemoto, S. Isoda and K. Komatsu, *Org. Biomol. Chem.*, 2007, **5**, 2592-2598.
59. X.-Y. Zhang, J.-D. Huang, J.-J. Yu, P. Li, W.-P. Zhang and T. Frauenheim, *Phys. Chem. Chem. Phys.*, 2015, **17**, 25463-25470.
60. M. Moral, A. J. Pérez-Jiménez and J. C. Sancho-García, *J. Phys. Chem. C*, 2017, **121**, 3171-3181.
61. H. Lee, Y. Zhang, L. Zhang, T. Mirabito, E. K. Burnett, S. Trahan, A. R. Mohebbi, S. C. B. Mannsfeld, F. Wudl and A. L. Briseno, *J. Mater. Chem. C*, 2014, **2**, 3361-3366.
62. M. Romain, M. Chevrier, S. Bebiche, T. Mohammed-Brahim, J. Rault-Berthelot, E. Jacques and C. Poriol, *J. Mater. Chem. C*, 2015, **3**, 5742-5753.
63. P. Sonar, L. Oldridge, A. C. Grimsdale, K. Müllen, M. Surin, R. Lazzaroni, P. Leclère, J. Pinto, L.-L. Chua, H. Sirringhaus and R. H. Friend, *Synth. Met.*, 2010, **160**, 468-474.
64. T.-J. Ha, D. Sparrowe and A. Dodabalapur, *Org. Electron.*, 2011, **12**, 1846-1851.
65. S. Georgakopoulos, D. Sparrowe, Y. Gu, M. M. Nielsen, F. Meyer and M. Shkunov, *Appl. Phys. Lett.*, 2012, **101**, 213305.
66. H. Kim, N. Schulte, G. Zhou, K. Müllen and F. Laquai, *Adv. Mater.*, 2011, **23**, 894-897.
67. W. M. Zhang, Y. Feng, K. S. Diao, L. Sun, F. Hong, Z. X. Su and Y. P. Hu, *Chem. J. Chinese U.*, 2013, **34**, 2233-2238.

68. M. L. Tang, T. Okamoto and Z. Bao, *J. Am. Chem. Soc.*, 2006, **128**, 16002-16003.
69. F. Valiyev, W. S. Hu, H. Y. Chen, M. Y. Kuo, I. Chao and Y. T. Tao, *Chem. Mater.*, 2007, **19**, 3018-3026.
70. Q. Yuan, S. C. B. Mannsfeld, M. L. Tang, M. F. Toney, J. Luening and Z. A. Bao, *J. Am. Chem. Soc.*, 2008, **130**, 3502-3508.
71. U. Kraft, J. E. Anthony, E. Ripaud, M. A. Loth, E. Weber and H. Klauk, *Chem. Mater.*, 2015, **27**, 998-1004.
72. M. L. Tang, A. D. Reichardt, P. Wei and Z. Bao, *J. Am. Chem. Soc.*, 2009, **131**, 5264-5273.
73. M. L. Tang, A. D. Reichardt, T. Okamoto, N. Miyaki and Z. Bao, *Adv. Funct. Mater.*, 2008, **18**, 1579-1585.
74. M. L. Tang, A. D. Reichardt, N. Miyaki, R. M. Stoltenberg and Z. Bao, *J. Am. Chem. Soc.*, 2008, **130**, 6064-6065.
75. M. L. Tang, A. D. Reichardt, T. Siegrist, S. C. B. Mannsfeld and Z. N. Bao, *Chem. Mater.*, 2008, **20**, 4669-4676.
76. M. L. Tang, J. H. Oh, A. D. Reichardt and Z. Bao, *J. Am. Chem. Soc.*, 2009, **131**, 3733-3740.
77. S. Chai, S. H. Wen, J. D. Huang and K. L. Han, *J. Comput. Chem.*, 2011, **32**, 3218-3225.
78. C. Y. Du, Y. L. Guo, Y. Q. Liu, W. F. Qiu, H. J. Zhang, X. Gao, Y. Liu, T. Qi, K. Lu and G. Yu, *Chem. Mater.*, 2008, **20**, 4188-4190.
79. C. Du, Y. Guo, J. Chen, H. Liu, Y. Liu, S. Ye, K. Lu, J. Zheng, T. Wu, Y. Liu, Z. Shuai and G. Yu, *J. Phys. Chem. C*, 2010, **114**, 10565-10571.
80. Y. Guo, C. Du, G. Yu, C.-a. Di, S. Jiang, H. Xi, J. Zheng, S. Yan, C. Yu, W. Hu and Y. Liu, *Adv. Funct. Mater.*, 2010, **20**, 1019-1024.
81. W. Zhang, J. Zhang, X. Chen, Z. Mao, X. Xie, L. Wang, Y. Liao, G. Yu, Y. Liu and D. Zhu, *J. Mater. Chem. C*, 2013, **1**, 6403-6410.
82. T. Okamoto, C. Mitsui, M. Yamagishi, K. Nakahara, J. Soeda, Y. Hirose, K. Miwa, H. Sato, A. Yamano, T. Matsushita, T. Uemura and J. Takeya, *Adv. Mater.*, 2013, **25**, 6392-6397.
83. S. Safizan, N. Shigeki and O. Hiroyuki, *Jpn. J. Appl. Phys.*, 2017, **56**, 03BB04.
84. C. Mitsui, T. Okamoto, H. Matsui, M. Yamagishi, T. Matsushita, J. Soeda, K. Miwa, H. Sato, A. Yamano, T. Uemura and J. Takeya, *Chem. Mater.*, 2013, **25**, 3952-3956.
85. T. Oyama, Y. S. Yang, K. Matsuo and T. Yasuda, *Chem. Commun.*, 2017, **53**, 3814-3817.
86. M. C. Chen, C. Kim, S. Y. Chen, Y. J. Chiang, M. C. Chung, A. Facchetti and T. J. Marks, *J. Mater. Chem.*, 2008, **18**, 1029-1036.
87. M. Mamada, H. Katagiri, M. Mizukami, K. Honda, T. Minamiki, R. Teraoka, T. Uemura and S. Tokito, *ACS Appl. Mater. Interfaces*, 2013, **5**, 9670-9677.
88. M. Mamada, T. Minamiki, H. Katagiri and S. Tokito, *Org. Lett.*, 2012, **14**, 4062-4065.
89. M. Nakano, K. Niimi, E. Miyazaki, I. Osaka and K. Takimiya, *J. Org. Chem.*, 2012, **77**, 8099-8111.
90. J. G. Laquindanum, H. E. Katz and A. J. Lovinger, *J. Am. Chem. Soc.*, 1998, **120**, 664-672.
91. H. E. Katz, W. Li, A. J. Lovinger and J. Laquindanum, *Synth. Met.*, 1999, **102**, 897-899.
92. C. Wang, D. Hashizume, M. Nakano, T. Ogaki, H. Takenaka, K. Kawabata and K. Takimiya, *Chem. Sci.*, 2020, **11**, 1573-1580.
93. P. Y. Huang, C. Kim and M. C. Chen, *Synlett*, 2011, 2151-2156.
94. C. Kim, P.-Y. Huang, J.-W. Jhuang, M.-C. Chen, J.-C. Ho, T.-S. Hu, J.-Y. Yan, L.-H. Chen, G.-H. Lee, A. Facchetti and T. J. Marks, *Org. Electron.*, 2010, **11**, 1363-1375.
95. L.-H. Chen, T.-S. Hu, P.-Y. Huang, C. Kim, C.-H. Yang, J.-J. Wang, J.-Y. Yan, J.-C. Ho, C.-C. Lee and M.-C. Chen, *ChemPhysChem*, 2013, **14**, 2772-2776.
96. M. M. Payne, S. R. Parkin, J. E. Anthony, C. C. Kuo and T. N. Jackson, *J. Am. Chem. Soc.*, 2005, **127**, 4986-4987.
97. K. C. Dickey, J. E. Anthony and Y. L. Loo, *Adv. Mater.*, 2006, **18**, 1721-1726.
98. K. C. Dickey, T. J. Smith, K. J. Stevenson, S. Subramanian, J. E. Anthony and Y. L. Loo, *Chem. Mater.*, 2007, **19**, 5210-5215.
99. W. H. Lee, J. A. Lim, D. H. Kim, J. H. Cho, Y. Jang, Y. H. Kim, J. I. Han and K. Cho, *Adv. Funct. Mater.*, 2008, **18**, 560-565.
100. S. Subramanian, S. K. Park, S. R. Parkin, V. Podzorov, T. N. Jackson and J. E. Anthony, *J. Am. Chem. Soc.*, 2008, **130**, 2706-2707.
101. J. E. Anthony, S. Subramanian, S. R. Parkin, S. K. Park and T. N. Jackson, *J. Mater. Chem.*, 2009, **19**, 7984-7989.

102. W. H. Lee, J. A. Lim, D. Kwak, J. H. Cho, H. S. Lee, H. H. Choi and K. Cho, *Adv. Mater.*, 2009, **21**, 4243-4248.
103. Y. S. Chung, N. Shin, J. Kang, Y. Jo, V. M. Prabhu, S. K. Satija, R. J. Kline, D. M. DeLongchamp, M. F. Toney, M. A. Loth, B. Purushothaman, J. E. Anthony and D. Y. Yoon, *J. Am. Chem. Soc.*, 2010, **133**, 412-415.
104. S. H. Kim, K. Hong, M. Jang, J. Jang, J. E. Anthony, H. Yang and C. E. Park, *Adv. Mater.*, 2010, **22**, 4809-4813.
105. K. Park, S. H. Park, E. Kim, J.-D. Kim, S.-Y. An, H. S. Lim, H. H. Lee, D. H. Kim, D. Y. Ryu, D. R. Lee and J. H. Cho, *Chem. Mater.*, 2010, **22**, 5377-5382.
106. S. H. Kim, M. Jang, H. Yang, J. E. Anthony and C. E. Park, *Adv. Funct. Mater.*, 2011, **21**, 2198-2207.
107. L. Yu, X. Li, E. Pavlica, M. A. Loth, J. E. Anthony, G. Bratina, C. Kjellander, G. Gelinck and N. Stingelin, *Appl. Phys. Lett.*, 2011, **99**, 263304.
108. S. S. Lee, M. A. Loth, J. E. Anthony and Y.-L. Loo, *J. Am. Chem. Soc.*, 2012, **134**, 5436-5439.
109. H. T. Yi, M. M. Payne, J. E. Anthony and V. Podzorov, *Nat. Commun.*, 2012, **3**, 1259.
110. J. Jang, J. Park, S. Nam, J. E. Anthony, Y. Kim, K. S. Kim, K. S. Kim, B. H. Hong and C. E. Park, *Nanoscale*, 2013, **5**, 11094-11101.
111. J. Kim, S. H. Kim, T. K. An, S. Park and C. E. Park, *J. Mater. Chem. C*, 2013, **1**, 1272-1278.
112. S. Nam, J. Jang, J. E. Anthony, J.-J. Park, C. E. Park and K. Kim, *ACS Appl. Mater. Interfaces*, 2013, **5**, 2146-2154.
113. J. Chen, M. Shao, K. Xiao, A. J. Rondinone, Y.-L. Loo, P. R. C. Kent, B. G. Sumpter, D. Li, J. K. Keum, P. J. Diemer, J. E. Anthony, O. D. Jurchescu and J. Huang, *Nanoscale*, 2014, **6**, 449-456.
114. M. Jang, J. H. Park, S. Im, S. H. Kim and H. Yang, *Adv. Mater.*, 2014, **26**, 288-292.
115. S. Lee, M. Jang and H. Yang, *ACS Appl. Mater. Interfaces*, 2014, **6**, 20444-20451.
116. J. Kim, M. Jang, T. K. An, S. Kim, H. Kim, S. H. Kim, H. Yang and C. E. Park, *Org. Electron.*, 2015, **17**, 87-93.
117. K. Kim, H. Kim, S. H. Kim and C. E. Park, *Phys. Chem. Chem. Phys.*, 2015, **17**, 16791-16797.
118. K. Kim, M. Jang, M. Lee, T. K. An, J. E. Anthony, S. H. Kim, H. Yang and C. E. Park, *J. Mater. Chem. C*, 2016, **4**, 6996-7003.
119. S. W. Button and J. M. Mativetsky, *Appl. Phys. Lett.*, 2017, **111**, 083302.
120. K. V. Nguyen, J. H. Lee, S. C. Lee, G. M. Ku and W. H. Lee, *Org. Electron.*, 2017, **41**, 107-113.
121. S. L. Stephanie, K. Chang Su, D. G. Enrique, P. Balaji, F. T. Michael, W. Cheng, H. Alexander, E. A. John and L. Yueh-Lin, *Adv. Mater.*, 2009, **21**, 3605-3609.
122. P. J. Diemer, C. R. Lyle, Y. Mei, C. Sutton, M. M. Payne, J. E. Anthony, V. Coropceanu, J.-L. Brédas and O. D. Jurchescu, *Adv. Mater.*, 2013, **25**, 6956-6962.
123. Y. Seo, J. H. Lee, J. E. Anthony, K. V. Nguyen, Y. H. Kim, H. W. Jang, S. Ko, Y. Cho and W. H. Lee, *Adv. Mater. Interfaces*, 2018, **5**, 1701399.
124. D. H. Kwak, H. H. Choi, J. E. Anthony, S. Kim, H. Chae, J. Hwang, S. Lee, H. J. Park, B.-G. Kim and W. H. Lee, *Org. Electron.*, 2020, **85**, 105878.
125. D. H. Kwak, Y. Seo, J. E. Anthony, S. Kim, J. Hur, H. Chae, H. J. Park, B.-G. Kim, E. Lee, S. Ko and W. H. Lee, *Adv. Mater. Interfaces*, 2020, **7**, 1901696.
126. R. K. Hallani, K. J. Thorley, Y. Mei, S. R. Parkin, O. D. Jurchescu and J. E. Anthony, *Adv. Funct. Mater.*, 2016, **26**, 2341-2348.
127. D. J. Gundlach, J. E. Royer, S. K. Park, S. Subramanian, O. D. Jurchescu, B. H. Hamadani, A. J. Moad, R. J. Kline, L. C. Teague, O. Kirillov, C. A. Richter, J. G. Kushmerick, L. J. Richter, S. R. Parkin, T. N. Jackson and J. E. Anthony, *Nat. Mater.*, 2008, **7**, 216-221.
128. O. D. Jurchescu, B. H. Hamadani, H. D. Xiong, S. K. Park, S. Subramanian, N. M. Zimmerman, J. E. Anthony, T. N. Jackson and D. J. Gundlach, *Appl. Phys. Lett.*, 2008, **92**, 132103.
129. O. D. Jurchescu, S. Subramanian, R. J. Kline, S. D. Hudson, J. E. Anthony, T. N. Jackson and D. J. Gundlach, *Chem. Mater.*, 2008, **20**, 6733-6737.
130. S. K. Park, D. A. Mourey, S. Subramanian, J. E. Anthony and T. N. Jackson, *Appl. Phys. Lett.*, 2008, **93**, 043301.
131. S. K. Park, D. A. Mourey, S. Subramanian, J. E. Anthony and T. N. Jackson, *IEEE Electron Device Lett.*, 2008, **29**, 1004-1006.
132. O. D. Jurchescu, D. A. Mourey, S. Subramanian, S. R. Parkin, B. M. Vogel, J. E. Anthony, T. N. Jackson and D. J. Gundlach, *Phys. Rev. B*, 2009, **80**, 085201.

133. D. A. Mourey, S. K. Park, D. A. Zhao, J. Sun, Y. V. Li, S. Subramanian, S. F. Nelson, D. H. Levy, J. E. Anthony and T. N. Jackson, *Org. Electron.*, 2009, **10**, 1632-1635.
134. A. D. Platt, J. Day, S. Subramanian, J. E. Anthony and O. Ostroverkhova, *J. Phys. Chem. C*, 2009, **113**, 14006-14014.
135. N. A. Azarova, J. W. Owen, C. A. McLellan, M. A. Grimminger, E. K. Chapman, J. E. Anthony and O. D. Jurchescu, *Org. Electron.*, 2010, **11**, 1960-1965.
136. D.-S. Leem, P. H. Wöbkenberg, J. Huang, T. D. Anthopoulos, D. D. C. Bradley and J. C. deMello, *Org. Electron.*, 2010, **11**, 1307-1312.
137. J. Smith, R. Hamilton, Y. Qi, A. Kahn, D. D. C. Bradley, M. Heaney, I. McCulloch and T. D. Anthopoulos, *Adv. Funct. Mater.*, 2010, **20**, 2330-2337.
138. A. K. Tripathi, E. C. P. Smits, M. Loth, J. E. Anthony and G. H. Gelinck, *Appl. Phys. Lett.*, 2011, **98**, 202106.
139. J. Jang, S. Nam, K. Im, J. Hur, S. N. Cha, J. Kim, H. B. Son, H. Suh, M. A. Loth, J. E. Anthony, J.-J. Park, C. E. Park, J. M. Kim and K. Kim, *Adv. Funct. Mater.*, 2012, **22**, 1005-1014.
140. D. Lehnherr, A. R. Waterloo, K. P. Goetz, M. M. Payne, F. Hampel, J. E. Anthony, O. D. Jurchescu and R. R. Tykwinski, *Org. Lett.*, 2012, **14**, 3660-3663.
141. R. Li, J. W. Ward, D.-M. Smilgies, M. M. Payne, J. E. Anthony, O. D. Jurchescu and A. Amassian, *Adv. Mater.*, 2012, **24**, 5553-5558.
142. J. W. Ward, M. A. Loth, R. J. Kline, M. Coll, C. Ocal, J. E. Anthony and O. D. Jurchescu, *J. Mater. Chem.*, 2012, **22**, 19047-19053.
143. S. Hunter and T. D. Anthopoulos, *Adv. Mater.*, 2013, **25**, 4320-4326.
144. Y. V. Li, D. A. Mourey, M. A. Loth, D. A. Zhao, J. E. Anthony and T. N. Jackson, *Org. Electron.*, 2013, **14**, 2411-2417.
145. N. Shin, J. Kang, L. J. Richter, V. M. Prabhu, R. J. Kline, D. A. Fischer, D. M. DeLongchamp, M. F. Toney, S. K. Satija, D. J. Gundlach, B. Purushothaman, J. E. Anthony and D. Y. Yoon, *Adv. Funct. Mater.*, 2013, **23**, 366-376.
146. S. Hunter, J. Chen and T. D. Anthopoulos, *Adv. Funct. Mater.*, 2014, **24**, 5969-5976.
147. J. Kim, S. Cho, Y.-H. Kim and S. K. Park, *Org. Electron.*, 2014, **15**, 2099-2106.
148. A. B. Naden, J. Loos and D. A. MacLaren, *J. Mater. Chem. C*, 2014, **2**, 245-255.
149. I. Nasrallah, K. K. Banger, Y. Vaynzof, M. M. Payne, P. Too, J. Jongman, J. E. Anthony and H. Sirringhaus, *Chem. Mater.*, 2014, **26**, 3914-3919.
150. A. Pierre, M. Sadeghi, M. M. Payne, A. Facchetti, J. E. Anthony and A. C. Arias, *Adv. Mater.*, 2014, **26**, 5722-5727.
151. J. W. Ward, K. P. Goetz, A. Obaid, M. M. Payne, P. J. Diemer, C. S. Day, J. E. Anthony and O. D. Jurchescu, *Appl. Phys. Lett.*, 2014, **105**, 083305.
152. P. J. Diemer, Z. A. Lamport, Y. Mei, J. W. Ward, K. P. Goetz, W. Li, M. M. Payne, M. Guthold, J. E. Anthony and O. D. Jurchescu, *Appl. Phys. Lett.*, 2015, **107**, 103303.
153. B. S. Hunter, J. W. Ward, M. M. Payne, J. E. Anthony, O. D. Jurchescu and T. D. Anthopoulos, *Appl. Phys. Lett.*, 2015, **106**, 223304.
154. S. Jin Lee, Y.-J. Kim, S. Young Yeo, E. Lee, H. Sun Lim, M. Kim, Y.-W. Song, J. Cho and J. Ah Lim, *Sci. Rep.*, 2015, **5**, 14010.
155. S. G. Lee, H. S. Lee, S. Lee, C. W. Kim and W. H. Lee, *Org. Electron.*, 2015, **24**, 113-119.
156. B. T. Lim, J. Cho, K. H. Cheon, K. Shin and D. S. Chung, *Org. Electron.*, 2015, **18**, 113-117.
157. S. Hunter, A. D. Mottram and T. D. Anthopoulos, *J. Appl. Phys.*, 2016, **120**, 025502.
158. H. M. Kim, H. W. Kang, D. K. Hwang, H. S. Lim, B.-K. Ju and J. A. Lim, *Adv. Funct. Mater.*, 2016, **26**, 2706-2714.
159. A. Y. B. Meneau, Y. Olivier, T. Backlund, M. James, D. W. Breiby, J. W. Andreasen and H. Sirringhaus, *Adv. Funct. Mater.*, 2016, **26**, 2326-2333.
160. M. R. Niazi, R. Li, M. Abdelsamie, K. Zhao, D. H. Anjum, M. M. Payne, J. Anthony, D.-M. Smilgies and A. Amassian, *Adv. Funct. Mater.*, 2016, **26**, 2371-2378.
161. C. Pitsalidis, A. M. Pappa, S. Hunter, A. Laskarakis, T. Kaimakamis, M. M. Payne, J. E. Anthony, T. D. Anthopoulos and S. Logothetidis, *J. Mater. Chem. C*, 2016, **4**, 3499-3507.

162. K. Zhao, O. Wodo, D. Ren, H. U. Khan, M. R. Niazi, H. Hu, M. Abdelsamie, R. Li, E. Q. Li, L. Yu, B. Yan, M. M. Payne, J. Smith, J. E. Anthony, T. D. Anthopoulos, S. T. Thoroddsen, B. Ganapathysubramanian and A. Amassian, *Adv. Funct. Mater.*, 2016, **26**, 1737-1746.
163. P. J. Diemer, J. Hayes, E. Welchman, R. Hallani, S. J. Pookpanratana, C. A. Hacker, C. A. Richter, J. E. Anthony, T. Thonhauser and O. D. Jurchescu, *Adv. Electron. Mater.*, 2017, **3**, 1600294.
164. Q. Zhang, F. Leonardi, S. Casalini and M. Mas-Torrent, *Adv. Funct. Mater.*, 2017, **27**, 1703899.
165. J. Panidi, A. F. Paterson, D. Khim, Z. Fei, Y. Han, L. Tsetseris, G. Vourlias, P. A. Patsalas, M. Heeney and T. D. Anthopoulos, *Adv. Sci.*, 2018, **5**, 1700290.
166. Y. Takeda, Y. Yoshimura, R. Shiwaku, K. Hayasaka, T. Sekine, T. Okamoto, H. Matsui, D. Kumaki, Y. Katayama and S. Tokito, *Adv. Electron. Mater.*, 2018, **4**, 1700313.
167. S. Anand, K. P. Goetz, Z. A. Lamport, A. M. Zeidell and O. D. Jurchescu, *Appl. Phys. Lett.*, 2019, **115**, 073301.
168. C. P. L. Rubinger, H. F. Haneef, C. Hewitt, D. Carroll, J. E. Anthony and O. D. Jurchescu, *Org. Electron.*, 2019, **68**, 205-211.
169. Q. Zhang, F. Leonardi, R. Pfattner and M. Mas-Torrent, *Adv. Mater. Interfaces*, 2019, **6**, 1900719.
170. I. Nasrallah, M. K. Ravva, K. Broch, J. Novak, J. Armitage, G. Schweicher, A. Sadhanala, J. E. Anthony, J.-L. Bredas and H. Sirringhaus, *Adv. Electron. Mater.*, 2020, **6**, 2000250.
171. T. Salzillo, N. Montes, R. Pfattner and M. Mas-Torrent, *J. Mater. Chem. C*, 2020, **8**, 15361-15367.
172. X. Zhang, W. Deng, B. Lu, X. Fang, X. Zhang and J. Jie, *Nanoscale Horiz.*, 2020, **5**, 1096-1105.
173. A. Kyndiah, M. Checa, F. Leonardi, R. Millan-Solsona, M. Di Muzio, S. Tanwar, L. Fumagalli, M. Mas-Torrent and G. Gomila, *Adv. Funct. Mater.*, 2021, **31**, 2008032.
174. Y. Chen, M. Wang, D. Zhang, H. Wang, W. Deng, J. Shi and J. Jie, *Appl. Phys. Lett.*, 2021, **119**, 183301.
175. X. Wu, R. Jia, J. Pan, J. Wang, W. Deng, P. Xiao, X. Zhang and J. Jie, *Adv. Funct. Mater.*, 2021, **31**, 2100202.
176. W. Deng, Y. Xiao, B. Lu, L. Zhang, Y. Xia, C. Zhu, X. Zhang, J. Guo, X. Zhang and J. Jie, *Adv. Mater.*, 2021, **33**, 2005915.
177. Z. Li, Y. F. Lim, J. B. Kim, S. R. Parkin, Y. L. Loo, G. G. Malliaras and J. E. Anthony, *Chem. Commun.*, 2011, **47**, 7617-7619.
178. K. Schulze, T. Bilkay and S. Janietz, *Appl. Phys. Lett.*, 2012, **101**, 043301.
179. B. R. Conrad, C. K. Chan, M. A. Loth, S. R. Parkin, X. Zhang, D. M. DeLongchamp, J. E. Anthony and D. J. Gundlach, *Appl. Phys. Lett.*, 2010, **97**, 133306.
180. K. P. Goetz, Z. Li, J. W. Ward, C. Bougher, J. Rivnay, J. Smith, B. R. Conrad, S. R. Parkin, T. D. Anthopoulos, A. Salleo, J. E. Anthony and O. D. Jurchescu, *Adv. Mater.*, 2011, **23**, 3698-3703.
181. Y. Mei, M. A. Loth, M. Payne, W. Zhang, J. Smith, C. S. Day, S. R. Parkin, M. Heeney, I. McCulloch, T. D. Anthopoulos, J. E. Anthony and O. D. Jurchescu, *Adv. Mater.*, 2013, **25**, 4352-4357.
182. W. Guo, Y. Liu, W. Huang, M. M. Payne, J. Anthony and H. E. Katz, *Org. Electron.*, 2014, **15**, 3061-3069.
183. C.-H. Kim, H. Hlaing, M. M. Payne, K. G. Yager, Y. Bonnassieux, G. Horowitz, J. E. Anthony and I. Kymissis, *ChemPhysChem*, 2014, **15**, 2913-2916.
184. R. K. Hallani, K. J. Thorley, A. K. Hailey, S. R. Parkin, Y.-L. Loo and J. E. Anthony, *J. Mater. Chem. C*, 2015, **3**, 8956-8962.
185. J. L. Brusso, O. D. Hirst, A. Dadvand, S. Ganesan, F. Cicoira, C. M. Robertson, R. T. Oakley, F. Rosei and D. F. Perepichka, *Chem. Mater.*, 2008, **20**, 2484-2494.
186. R. Gutzler, C. Fu, A. Dadvand, Y. Hua, J. M. MacLeod, F. Rosei and D. F. Perepichka, *Nanoscale*, 2012, **4**, 5965-5971.
187. W. J. Liu, Y. Zhou, Y. G. Ma, Y. Cao, J. Wang and J. Pei, *Org. Lett.*, 2007, **9**, 4187-4190.
188. A. A. Leitch, K. A. Stobo, B. Hussain, M. Ghoussoub, S. Ebrahimi-Takaloo, P. Servati, I. Korobkov and J. L. Brusso, *Eur. J. Org. Chem.*, 2013, **2013**, 5854-5863.
189. Y. Nishihara, M. Kinoshita, K. Hyodo, Y. Okuda, R. Eguchi, H. Goto, S. Hamao, Y. Takabayashi and Y. Kubozono, *RSC Adv.*, 2013, **3**, 19341-19347.
190. Y. Kubozono, K. Hyodo, S. Hamao, Y. Shimo, H. Mori and Y. Nishihara, *Sci. Rep.*, 2016, **6**, 38535.
191. Y. Kubozono, K. Hyodo, H. Mori, S. Hamao, H. Goto and Y. Nishihara, *J. Mater. Chem. C*, 2015, **3**, 2413-2421.
192. Y. Yi, L. Zhu and J.-L. Bredas, *J. Phys. Chem. C*, 2012, **116**, 5215-5224.

193. W.-C. Wang, T.-T. Yeh, W.-L. Liao, J.-T. Chen and C.-S. Hsu, *Org. Electron.*, 2018, **57**, 82-88.
194. W.-L. Liao, T.-H. Lee, J.-T. Chen and C.-S. Hsu, *J. Mater. Chem. C*, 2016, **4**, 2284-2288.
195. K. E. Rodda, *Nat. Chem.*, 2021, **13**, 1156-1156.
196. L. Chen, S. R. Puniredd, Y.-Z. Tan, M. Baumgarten, U. Zschieschang, V. Enkelmann, W. Pisula, X. Feng, H. Klauk and K. Müllen, *J. Am. Chem. Soc.*, 2012, **134**, 17869-17872.
197. H. Ebata, E. Miyazaki, T. Yamamoto and K. Takimiya, *Org. Lett.*, 2007, **9**, 4499-4502.
198. P. Gao, D. Beckmann, H. N. Tsao, X. L. Feng, V. Enkelmann, W. Pisula and K. Müllen, *Chem. Commun.*, 2008, 1548-1550.
199. T. Vehoff, B. Baumeier, A. Troisi and D. Andrienko, *J. Am. Chem. Soc.*, 2010, **132**, 11702-11708.
200. H. T. Black, S. Liu and V. Sheares Ashby, *Org. Lett.*, 2011, **13**, 6492-6495.
201. Y. Ogawa, K. Yamamoto, C. Miura, S. Tamura, M. Saito, M. Mamada, D. Kumaki, S. Tokito and H. Katagiri, *ACS Appl. Mater. Interfaces*, 2017, **9**, 9902-9909.
202. S. Inoue, S. Shinamura, Y. Sadamitsu, S. Arai, S. Horiuchi, M. Yoneya, K. Takimiya and T. Hasegawa, *Chem. Mater.*, 2018, **30**, 5050-5060.
203. J. Gao, R. Li, L. Li, Q. Meng, H. Jiang, H. Li and W. Hu, *Adv. Mater.*, 2007, **19**, 3008-3011.
204. R. Li, L. Jiang, Q. Meng, J. Gao, H. Li, Q. Tang, M. He, W. Hu, Y. Liu and D. Zhu, *Adv. Mater.*, 2009, **21**, 4492-4495.
205. Y. Miyata, E. Yoshikawa, T. Minari, K. Tsukagoshi and S. Yamaguchi, *J. Mater. Chem.*, 2012, **22**, 7715-7717.
206. P. He, Z. Tu, G. Zhao, Y. Zhen, H. Geng, Y. Yi, Z. Wang, H. Zhang, C. Xu, J. Liu, X. Lu, X. Fu, Q. Zhao, X. Zhang, D. Ji, L. Jiang, H. Dong and W. Hu, *Adv. Mater.*, 2015, **27**, 825-830.
207. R. Li, H. Dong, X. Zhan, Y. He, H. Li and W. Hu, *J. Mater. Chem.*, 2010, **20**, 6014-6018.
208. T. Mori, T. Oyama, H. Komiyama and T. Yasuda, *J. Mater. Chem. C*, 2017, **5**, 5872-5876.
209. B. Wex, B. R. Kaafarani, R. Schroeder, L. A. Majewski, P. Burckel, M. Grell and D. C. Neckers, *J. Mater. Chem.*, 2006, **16**, 1121-1124.
210. T. Oyama, T. Mori, T. Hashimoto, M. Kamiya, T. Ichikawa, H. Komiyama, Y. S. Yang and T. Yasuda, *Adv. Electron. Mater.*, 2018, **4**, 1700390.
211. C. P. Yu, M. Mitani, H. Ishii, M. Yamagishi, H. Kitamura, M. Yano, J. Takeya and T. Okamoto, *J. Phys. Chem. C*, 2020, **124**, 17503-17511.
212. C. Mitsui, H. Tsuyama, R. Shikata, Y. Murata, H. Kuniyasu, M. Yamagishi, H. Ishii, A. Yamamoto, Y. Hirose, M. Yano, T. Takehara, T. Suzuki, H. Sato, A. Yamano, E. Fukuzaki, T. Watanabe, Y. Usami, J. Takeya and T. Okamoto, *J. Mater. Chem. C*, 2017, **5**, 1903-1909.
213. K. He, S. Zhou, W. Li, H. Tian, Q. Tang, J. Zhang, D. Yan, Y. Geng and F. Wang, *J. Mater. Chem. C*, 2019, **7**, 3656-3664.
214. T. Higashino, S. Inoue, S. Arai, H. Matsui, N. Toda, S. Horiuchi, R. Azumi and T. Hasegawa, *Chem. Mater.*, 2021, **33**, 7379-7385.
215. P. Gao, D. Beckmann, H. N. Tsao, X. Feng, V. Enkelmann, M. Baumgarten, W. Pisula and K. Müllen, *Adv. Mater.*, 2009, **21**, 213-216.
216. S. Wang, P. Gao, I. Liebewirth, K. Kirchhoff, S. Pang, X. Feng, W. Pisula and K. Müllen, *Chem. Mater.*, 2011, **23**, 4960-4964.
217. L. Li, P. Gao, W. Wang, K. Müllen, H. Fuchs and L. Chi, *Angew. Chem. Int. Ed.*, 2013, **52**, 12530-12535.
218. B. Wang, T. Zhu, L. Huang, T. L. D. Tam, Z. Cui, J. Ding and L. Chi, *Org. Electron.*, 2015, **24**, 170-175.
219. R. Shiwaku, Y. Takeda, T. Fukuda, K. Fukuda, H. Matsui, D. Kumaki and S. Tokito, *Sci. Rep.*, 2016, **6**, 34723.
220. L. Li, P. Gao, K. C. Schuermann, S. Ostendorp, W. Wang, C. Du, Y. Lei, H. Fuchs, L. D. Cola, K. Müllen and L. Chi, *J. Am. Chem. Soc.*, 2010, **132**, 8807-8809.
221. S. Minami, M. Ide, K. Hirano, T. Satoh, T. Sakurai, K. Kato, M. Takata, S. Seki and M. Miura, *Phys. Chem. Chem. Phys.*, 2014, **16**, 18805-18812.
222. J. Li, X. Qiao, Y. Xiong, H. Li and D. Zhu, *Chem. Mater.*, 2014, **26**, 5782-5788.
223. J. Zhang, K. Zhang, W. Zhang, Z. Mao, M. S. Wong and G. Yu, *J. Mater. Chem. C*, 2015, **3**, 10892-10897.
224. C. Li, J. Zhang, Z. Li, W. Zhang, M. S. Wong and G. Yu, *J. Mater. Chem. C*, 2019, **7**, 297-301.

225. K. Xiao, Y. Q. Liu, T. Qi, W. Zhang, F. Wang, J. H. Gao, W. F. Qiu, Y. Q. Ma, G. L. Cui, S. Y. Chen, X. W. Zhan, G. Yu, J. G. Qin, W. P. Hu and D. B. Zhu, *J. Am. Chem. Soc.*, 2005, **127**, 13281-13286.
226. P. Li, Y. Cui, C. Song and H. Zhang, *J. Phys. Chem. C*, 2016, **120**, 14484-14494.
227. Y. Jiang, T. Okamoto, H. A. Becerril, S. Hong, M. L. Tang, A. C. Mayer, J. E. Parmer, M. D. McGehee and Z. A. Bao, *Macromolecules*, 2010, **43**, 6361-6367.
228. J.-S. Wu, C.-T. Lin, C.-L. Wang, Y.-J. Cheng and C.-S. Hsu, *Chem. Mater.*, 2012, **24**, 2391-2399.
229. F. He, W. Wang, W. Chen, T. Xu, S. B. Darling, J. Strzalka, Y. Liu and L. P. Yu, *J. Am. Chem. Soc.*, 2011, **133**, 3284-3287.
230. Y. Jiang, J. Mei, A. L. Ayzner, M. F. Toney and Z. Bao, *Chem. Commun.*, 2012, **48**, 7286-7288.
231. J. Kim, A. R. Han, J. H. Seo, J. H. Oh and C. Yang, *Chem. Mater.*, 2012, **24**, 3464-3472.
232. Y. Cai, X. Xue, G. Han, Z. Bi, B. Fan, T. Liu, D. Xie, L. Huo, W. Ma, Y. Yi, C. Yang and Y. Sun, *Chem. Mater.*, 2018, **30**, 319-323.
233. J. Hong, C. Wang, H. Cha, H. N. Kim, Y. Kim, C. E. Park, T. K. An, S.-K. Kwon and Y.-H. Kim, *Chem.-Eur. J.*, 2019, **25**, 649-656.
234. A. Keerthi, C. An, M. Li, T. Marszalek, A. G. Ricciardulli, B. Radha, F. D. Alsewailam, K. Müllen and M. Baumgarten, *Polym. Chem.*, 2016, **7**, 1545-1548.
235. M. Q. He, J. F. Li, M. L. Sorensen, F. X. Zhang, R. R. Hancock, H. H. Fong, V. A. Pozdin, D. M. Smilgies and G. G. Malliaras, *J. Am. Chem. Soc.*, 2009, **131**, 11930-11938.
236. C. Mitsui, M. Yamagishi, R. Shikata, H. Ishii, T. Matsushita, K. Nakahara, M. Yano, H. Sato, A. Yamano, J. Takeya and T. Okamoto, *Bull. Chem. Soc. Jpn.*, 2017, **90**, 931-938.
237. K. Nakahara, C. Mitsui, T. Okamoto, M. Yamagishi, H. Matsui, T. Ueno, Y. Tanaka, M. Yano, T. Matsushita, J. Soeda, Y. Hirose, H. Sato, A. Yamano and J. Takeya, *Chem. Commun.*, 2014, **50**, 5342-5344.
238. N. Katsumasa, M. Chikahiko, O. Toshihiro, Y. Masakazu, M. Kazumoto, S. Hiroyasu, Y. Akihito, U. Takafumi and T. Jun, *Chem. Lett.*, 2013, **42**, 654-656.
239. M. Watanabe, W.-T. Su, Y. J. Chang, T.-H. Chao, Y.-S. Wen and T. J. Chow, *Chem. Asian J.*, 2013, **8**, 60-64.
240. T. Okamoto, M. Mitani, C. P. Yu, C. Mitsui, M. Yamagishi, H. Ishii, G. Watanabe, S. Kumagai, D. Hashizume, S. Tanaka, M. Yano, T. Kushida, H. Sato, K. Sugimoto, T. Kato and J. Takeya, *J. Am. Chem. Soc.*, 2020, **142**, 14974-14984.
241. Q. Shi, X. Shi, C. Feng, Y. Wu, N. Zheng, J. Liu, X. Wu, H. Chen, A. Peng, J. Li, L. Jiang, H. Fu, Z. Xie, S. R. Marder, S. B. Blakey and H. Huang, *Angew. Chem. Int. Ed.*, 2021, **60**, 2924-2928.
242. T. Mori and T. Yasuda, *Adv. Electron. Mater.*, 2021, **7**, 2001052.
243. H. P. Zhao, L. Jiang, H. L. Dong, H. X. Li, W. P. Hu and B. S. Ong, *ChemPhysChem*, 2009, **10**, 2345-2348.
244. J. Bintinger, S. Yang, P. Fruhmann, B. Holzer, B. Stöger, A. Svirikova, M. Marchetti-Deschmann, E. Horkel, C. Hametner, J. Fröhlich, I. Kymissis and H. Mikula, *Synth. Met.*, 2017, **228**, 9-17.
245. H. Jiang, H. Zhao, K. K. Zhang, X. Chen, C. Kloc and W. Hu, *Adv. Mater.*, 2011, **23**, 5075-5080.
246. H. Jiang, P. Hu, J. Ye, A. Chaturvedi, K. K. Zhang, Y. Li, Y. Long, D. Fichou, C. Kloc and W. Hu, *Angew. Chem. Int. Ed.*, 2018, **57**, 8875-8880.
247. P.-L. T. Boudreault, S. Wakim, M. L. Tang, Y. Tao, Z. Bao and M. Leclerc, *J. Mater. Chem.*, 2009, **19**, 2921-2928.
248. G. Zhao, H. Dong, H. Zhao, L. Jiang, X. Zhang, J. Tan, Q. Meng and W. Hu, *J. Mater. Chem.*, 2012, **22**, 4409-4417.
249. G. Zhao, H. Dong, L. Jiang, H. Zhao, X. Qin and W. Hu, *Appl. Phys. Lett.*, 2012, **101**, 103302.
250. Y. L. Wu, Y. N. Li, S. Gardner and B. S. Ong, *J. Am. Chem. Soc.*, 2005, **127**, 614-618.
251. P. L. T. Boudreault, S. Wakim, N. Blouin, M. Simard, C. Tessier, Y. Tao and M. Leclerc, *J. Am. Chem. Soc.*, 2007, **129**, 9125-9136.
252. Y. Guo, H. Zhao, G. Yu, C.-a. Di, W. Liu, S. Jiang, S. Yan, C. Wang, H. Zhang, X. Sun, X. Tao and Y. Liu, *Adv. Mater.*, 2008, **20**, 4835-4839.
253. S. Wakim, J. Bouchard, M. Simard, N. Drolet, Y. Tao and M. Leclerc, *Chem. Mater.*, 2004, **16**, 4386-4388.
254. Y. N. Li, Y. L. Wu, S. Gardner and B. S. Ong, *Adv. Mater.*, 2005, **17**, 849-853.
255. M. Kirkus, J. Simokaitiene, J. V. Grazulevicius and V. Jankauskas, *Synth. Met.*, 2010, **160**, 750-755.

256. E. M. Garcia-Frutos, E. Gutierrez-Puebla, M. A. Monge, R. Ramirez, P. d. Andres, A. d. Andres and B. Goez-Lor, *Org. Electron.*, 2009, **10**, 643-652.
257. M. Reig, J. Puigdollers and D. Velasco, *J. Mater. Chem. C*, 2015, **3**, 506-513.
258. M. Reig, G. Bagdziunas, A. Ramanavicius, J. Puigdollers and D. Velasco, *Phys. Chem. Chem. Phys.*, 2018, **20**, 17889-17898.
259. C. Ruiz, I. Arrechea-Marcos, A. Benito-Hernandez, E. Gutierrez-Puebla, M. A. Monge, J. T. Lopez Navarrete, M. C. Ruiz Delgado, R. P. Ortiz and B. Gomez-Lor, *J. Mater. Chem. C*, 2018, **6**, 50-56.
260. P.-L. T. Boudreault, A. A. Virkar, Z. Bao and M. Leclerc, *Org. Electron.*, 2010, **11**, 1649-1659.
261. M. Zhao, B. Zhang and Q. Miao, *Angew. Chem. Int. Ed.*, 2020, **59**, 9678-9683.
262. H. Usta, C. Kim, Z. Wang, S. Lu, H. Huang, A. Facchetti and T. J. Marks, *J. Mater. Chem.*, 2012, **22**, 4459-4472.
263. Z. Wang, C. Kim, A. Facchetti and T. J. Marks, *J. Am. Chem. Soc.*, 2007, **129**, 13362-13363.
264. X.-K. Chen, L.-Y. Zou, J.-F. Guo and A.-M. Ren, *J. Mater. Chem.*, 2012, **22**, 6471-6484.
265. N. Yee, A. Dadvand and D. F. Perepichka, *J. Org. Chem.*, 2020, **85**, 5073-5077.
266. R. S. Sprick, M. Hoyos, M. S. Wrackmeyer, A. V. Sheridan Parry, I. M. Grace, C. Lambert, O. Navarro and M. L. Turner, *J. Mater. Chem. C*, 2014, **2**, 6520-6528.
267. Y. N. Li, Y. L. Wu and B. S. Ong, *Macromolecules*, 2006, **39**, 6521-6527.
268. S. Wakim, B. R. Aich, Y. Tao and M. Leclerc, *Polym. Rev.*, 2008, **48**, 432-462.
269. Y.-Y. Liu, C.-L. Song, W.-J. Zeng, K.-G. Zhou, Z.-F. Shi, C.-B. Ma, F. Yang, H.-L. Zhang and X. Gong, *J. Am. Chem. Soc.*, 2010, **132**, 16349-16351.
270. W.-J. Zeng, X.-Y. Zhou, X.-J. Pan, C.-L. Song and H.-L. Zhang, *AIP Adv.*, 2013, **3**, 012101-012106.
271. X.-D. Tang, Y. Liao, H. Geng and Z.-G. Shuai, *J. Mater. Chem.*, 2012, **22**, 18181-18191.
272. C. A. Di, J. Li, G. Yu, Y. Xiao, Y. L. Guo, Y. Q. Liu, X. H. Qian and D. B. Zhu, *Org. Lett.*, 2008, **10**, 3025-3028.
273. S. Jung, M. Albariqi, G. Gruntz, T. Al-Hathal, A. Peinado, E. Garcia-Caurel, Y. Nicolas, T. Toupance, Y. Bonnassieux and G. Horowitz, *ACS Appl. Mater. Interfaces*, 2016, **8**, 14701-14708.
274. H. Yanagisawa, J. Mizuguchi, S. Aramaki and Y. Sakai, *Jpn. J. Appl. Phys.*, 2008, **47**, 4728-4731.
275. D. Berg, C. Nielinger, W. Mader and M. Sokolowski, *Synth. Met.*, 2009, **159**, 2599-2602.
276. E. D. Glowacki, L. Leonat, M. Irimia-Vladu, R. Schwodiauer, M. Ullah, H. Sitter, S. Bauer and N. S. Sariciftci, *Appl. Phys. Lett.*, 2012, **101**, 023305.
277. E. D. Glowacki, M. Irimia-Vladu, M. Kaltenbrunner, J. Gsiorowski, M. S. White, U. Monkowius, G. Romanazzi, G. P. Suranna, P. Mastroilli, T. Sekitani, S. Bauer, T. Someya, L. Torsi and N. S. Sariciftci, *Adv. Mater.*, 2013, **25**, 1563-1569.
278. Z.-X. Xu, H.-F. Xiang, V. A. L. Roy, S. S.-Y. Chui, Y. Wang, P. T. Lai and C.-M. Che, *Appl. Phys. Lett.*, 2009, **95**, 123305.
279. T. Marszalek, I. Krygier, A. Pron, Z. Wrobel, P. M. W. Blom, I. Kulszewicz-Bajer and W. Pisula, *Org. Electron.*, 2019, **65**, 127-134.
280. Q. Miao, T. Q. Nguyen, T. Someya, G. B. Blanchet and C. Nuckolls, *J. Am. Chem. Soc.*, 2003, **125**, 10284-10287.
281. Q. Tang, D. Q. Zhang, S. L. Wang, N. Ke, J. B. Xu, J. C. Yu and Q. Miao, *Chem. Mater.*, 2009, **21**, 1400-1405.
282. S.-Z. Weng, P. Shukla, M.-Y. Kuo, Y.-C. Chang, H.-S. Sheu, I. Chao and Y.-T. Tao, *ACS Appl. Mater. Interfaces*, 2009, **1**, 2071-2079.
283. X. Wang and K.-C. Lau, *J. Phys. Chem. C*, 2012, **116**, 22749-22758.
284. T. Itoh, S. Aomori, M. Oh-e, M. Koden and Y. Arakawa, *Synth. Met.*, 2012, **162**, 1264-1270.
285. Z. Liang, Q. Tang, J. Xu and Q. Miao, *Adv. Mater.*, 2011, **23**, 1535-1539.
286. X.-K. Chen, L.-Y. Zou, J.-X. Fan, S.-F. Zhang and A.-M. Ren, *Org. Electron.*, 2012, **13**, 2832-2842.
287. Z. Liang, Q. Tang, J. Liu, J. Li, F. Yan and Q. Miao, *Chem. Mater.*, 2010, **22**, 6438-6443.
288. X.-K. Chen, J.-F. Guo, L.-Y. Zou, A.-M. Ren and J.-X. Fan, *J. Phys. Chem. C*, 2011, **115**, 21416-21428.
289. D. Liu, Z. Li, Z. He, J. Xu and Q. Miao, *J. Mater. Chem.*, 2012, **22**, 4396-4400.
290. M. M. Islam, S. Pola and Y. T. Tao, *Chem. Commun.*, 2011, **47**, 6356-6358.
291. Z. Liang, Q. Tang, R. Mao, D. Liu, J. Xu and Q. Miao, *Adv. Mater.*, 2011, **23**, 5514-5518.



292. Y. Q. Ma, Y. M. Sun, Y. Q. Liu, J. H. Gao, S. Y. Chen, X. B. Sun, W. F. Qiu, G. Yu, G. L. Cui, W. P. Hu and D. B. Zhu, *J. Mater. Chem.*, 2005, **15**, 4894-4898.
293. Q. Tang, J. Liu, H. S. Chan and Q. Miao, *Chem.-Eur. J.*, 2009, **15**, 3965-3969.
294. F. Paulus, B. D. Lindner, R. F. Rominger, A. Leineweber, Y. Vaynzof, H. Sirringhaus and U. H. F. Bunz, *J. Mater. Chem. C*, 2015, **3**, 1604-1609.
295. Z. K. He, D. Q. Liu, R. X. Mao, Q. Tang and Q. Miao, *Org. Lett.*, 2012, **14**, 1050-1053.
296. Q. Tang, Z. Liang, J. Liu, J. Xu and Q. Miao, *Chem. Commun.*, 2010, **46**, 2977-2979.
297. F. Paulus, M. Porz, M. Schaffroth, F. Rominger, A. Leineweber, Y. Vaynzof and U. H. F. Bunz, *Org. Electron.*, 2016, **33**, 102-109.
298. C. Wang, Z. Liang, Y. Liu, X. Wang, N. Zhao, Q. Miao, W. Hu and J. Xu, *J. Mater. Chem.*, 2011, **21**, 15201-15204.
299. D. Liu, X. Xu, Y. Su, Z. He, J. Xu and Q. Miao, *Angew. Chem. Int. Ed.*, 2013, **52**, 6222-6227.
300. X. Xu, Y. Yao, B. Shan, X. Gu, D. Liu, J. Liu, J. Xu, N. Zhao, W. Hu and Q. Miao, *Adv. Mater.*, 2016, **28**, 5276-5283.
301. H. Reiss, L. Ji, J. Han, S. Koser, O. Tverskoy, J. Freudenberg, F. Hinkel, M. Moos, A. Friedrich, I. Krummenacher, C. Lambert, H. Braunschweig, A. Dreuw, T. B. Marder and U. H. F. Bunz, *Angew. Chem. Int. Ed.*, 2018, **57**, 9543-9547.
302. M. Chu, J.-X. Fan, S. Yang, D. Liu, C. F. Ng, H. Dong, A.-M. Ren and Q. Miao, *Adv. Mater.*, 2018, **30**, 1803467.
303. D. Zhao, Z. Zhu, M.-Y. Kuo, C.-C. Chueh and A. K. Y. Jen, *Angew. Chem. Int. Ed.*, 2016, **55**, 8999-9003.
304. V. Lemaure, D. A. Da Silva Filho, V. Coropceanu, M. Lehmann, Y. Geerts, J. Piris, M. G. Debije, A. M. Van de Craats, K. Senthilkumar, L. D. A. Siebbeles, J. M. Warman, J. L. Bredas and J. Cornil, *J. Am. Chem. Soc.*, 2004, **126**, 3271-3279.
305. M. Lehmann, G. Kestemont, R. Gómez Aspe, C. Buess-Herman, M. H. J. Koch, M. G. Debije, J. Piris, M. P. de Haas, J. M. Warman, M. D. Watson, V. Lemaure, J. Cornil, Y. H. Geerts, R. Gearba and D. A. Ivanov, *Chem.-Eur. J.*, 2005, **11**, 3349-3362.
306. B. Domercq, J. S. Yu, B. R. Kaafarani, T. Kondo, S. Yoo, J. N. Haddock, S. Barlow, S. R. Marder and B. Kippelen, *Mol. Cryst. Liq. Cryst.*, 2008, **481**, 80-93.
307. F. Selzer, C. Falkenberg, M. Hamburger, M. Baumgarten, K. Müllen, K. Leo and M. Riede, *J. Appl. Phys.*, 2014, **115**, 054515.
308. S. Barlow, Q. Zhang, B. R. Kaafarani, C. Risko, F. Amy, C. K. Chan, B. Domercq, Z. A. Starikova, M. Y. Antipin, T. V. Timofeeva, B. Kippelen, J. L. Bredas, A. Kahn and S. R. Marder, *Chem.-Eur. J.*, 2007, **13**, 3537-3547.
309. B. R. Kaafarani, T. Kondo, J. S. Yu, Q. Zhang, D. Dattilo, C. Risko, S. C. Jones, S. Barlow, B. Domercq, F. Amy, A. Kahn, J. L. Bredas, B. Kippelen and S. R. Marder, *J. Am. Chem. Soc.*, 2005, **127**, 16358-16359.
310. X. Y. Liu, T. Usui and J. Hanna, *Chem.-Eur. J.*, 2014, **20**, 14207-14212.
311. H. Li, X. Wang, F. Liu and H. Fu, *Polym. Chem.*, 2015, **6**, 3283-3289.
312. K. Kawabata, M. Saito, N. Takemura, I. Osaka and K. Takimiya, *Polym. J.*, 2016, **49**, 169-176.
313. I. Osaka, M. Akita, T. Koganezawa and K. Takimiya, *Chem. Mater.*, 2012, **24**, 1235-1243.
314. M. Akita, I. Osaka and K. Takimiya, *Materials*, 2013, **6**, 1061-1071.
315. J. Jeon, H. Jhon, M. Kang, H. J. Song and T. K. An, *Org. Electron.*, 2018, **56**, 1-4.
316. D. H. Kim, H. J. Song, E. J. Lee, E. J. Ko and D. K. Moon, *Synth. Met.*, 2015, **210**, 304-313.
317. H. Xu, Y.-C. Zhou, X.-Y. Zhou, K. Liu, L.-Y. Cao, Y. Ai, Z.-P. Fan and H.-L. Zhang, *Adv. Funct. Mater.*, 2014, **24**, 2907-2915.
318. H. Tian, Y. Deng, F. Pan, L. Huang, D. Yan, Y. Geng and F. Wang, *J. Mater. Chem.*, 2010, **20**, 7998-8004.
319. T. Hodsden, K. J. Thorley, J. Panidi, A. Basu, A. V. Marsh, H. Dai, A. J. P. White, C. Wang, W. Mitchell, F. Glöcklhofer, T. D. Anthopoulos and M. Heeney, *Adv. Funct. Mater.*, 2020, **30**, 2000325.
320. T. Hodsden, K. J. Thorley, A. Basu, A. J. P. White, C. Wang, W. Mitchell, F. Glöcklhofer, T. D. Anthopoulos and M. Heeney, *Mater. Adv.*, 2021, **2**, 1706-1714.
321. D. Liu, M. Xiao, Z. Du, Y. Yan, L. Han, V. A. L. Roy, M. Sun, W. Zhu, C. S. Lee and R. Yang, *J. Mater. Chem. C*, 2014, **2**, 7523-7530.
322. C. Sun, F. Pan, H. Bin, J. Zhang, L. Xue, B. Qiu, Z. Wei, Z.-G. Zhang and Y. Li, *Nat. Commun.*, 2018, **9**, 743.

323. X. Song, N. Gasparini, M. M. Nahid, H. Chen, S. M. Macphee, W. Zhang, V. Norman, C. Zhu, D. Bryant, H. Ade, I. McCulloch and D. Baran, *Adv. Funct. Mater.*, 2018, **28**, 1802895.
324. P. Kafourou, B. Park, J. Luke, L. Tan, J. Panidi, F. Glöcklhofer, J. Kim, T. D. Anthopoulos, J.-S. Kim, K. Lee, S. Kwon and M. Heeney, *Angew. Chem. Int. Ed.*, 2021, **60**, 5970-5977.
325. L. Ru-Ze, B. Maxime, S. Victoria, Z. Weimin, L. C. V. M., L. Sergei, K. Zhipeng, F. Yuliar, L. Shengjian, M. Iain, T. M. F. and B. P. M., *Adv. Energy Mater.*, 2018, **8**, 1800264.
326. P. Jiang, S. Ming, Q.-Q. Jia, Y. Liu, H. Lu, M. Li, X. Xu, H.-B. Li and Z. Bo, *J. Mater. Chem. A*, 2018, **6**, 21335-21340.
327. C. Yao, C. Peng, Y. Yang, L. Li, M. Bo and J. Wang, *J. Mater. Chem. C*, 2018, **6**, 4912-4918.
328. Y. Liu, C. e. Zhang, D. Hao, Z. Zhang, L. Wu, M. Li, S. Feng, X. Xu, F. Liu, X. Chen and Z. Bo, *Chem. Mater.*, 2018, **30**, 4307-4312.
329. R. Li, G. Liu, R. Xie, Z. Wang, X. Yang, K. An, W. Zhong, X.-F. Jiang, L. Ying, F. Huang and Y. Cao, *J. Mater. Chem. C*, 2018, **6**, 7046-7053.
330. W. Zhang, J. Smith, S. E. Watkins, R. Gysel, M. McGehee, A. Salleo, J. Kirkpatrick, S. Ashraf, T. Anthopoulos, M. Heeney and I. McCulloch, *J. Am. Chem. Soc.*, 2010, **132**, 11437-11439.
331. X. Zhang, H. Bronstein, A. J. Kronemeijer, J. Smith, Y. Kim, R. J. Kline, L. J. Richter, T. D. Anthopoulos, H. Sirringhaus, K. Song, M. Heeney, W. Zhang, I. McCulloch and D. M. DeLongchamp, *Nat. Commun.*, 2013, **4**, 2238.
332. D. Venkateshvaran, M. Nikolka, A. Sadhanala, V. Lemaury, M. Zelazny, M. Kepa, M. Hurhangee, A. J. Kronemeijer, V. Pecunia, I. Nasrallah, I. Romanov, K. Broch, I. McCulloch, D. Emin, Y. Olivier, J. Cornil, D. Beljonne and H. Sirringhaus, *Nature*, 2014, **515**, 384-388.
333. Z. Liu, Z. Yin, S.-C. Chen, S. Dai, J. Huang and Q. Zheng, *Org. Electron.*, 2018, **53**, 205-212.
334. E.-S. Shin and Y.-Y. Noh, *Org. Electron.*, 2018, **53**, 111-116.
335. Y. Zheng, Z. Yu, S. Zhang, X. Kong, W. Michaels, W. Wang, G. Chen, D. Liu, J.-C. Lai, N. Prine, W. Zhang, S. Nikzad, C. B. Cooper, D. Zhong, J. Mun, Z. Zhang, J. Kang, J. B. H. Tok, I. McCulloch, J. Qin, X. Gu and Z. Bao, *Nat. Commun.*, 2021, **12**, 5701.
336. W. Zhong, S. Sun, L. Ying, F. Liu, L. Lan, F. Huang and Y. Cao, *ACS Appl. Mater. Interfaces*, 2017, **9**, 7315-7321.
337. C.-H. Lee, Y.-Y. Lai, J.-Y. Hsu, P.-K. Huang and Y.-J. Cheng, *Chem. Sci.*, 2017, **8**, 2942-2951.
338. J.-i. Nishida, H. Deno, S. Ichimura, T. Nakagawa and Y. Yamashita, *J. Mater. Chem.*, 2012, **22**, 4483-4490.
339. T. Qi, Y. L. Guo, Y. Q. Liu, H. X. Xi, H. J. Zhang, X. K. Gao, Y. Liu, K. Lu, C. Y. Du, G. Yu and D. B. Zhu, *Chem. Commun.*, 2008, 6227-6229.
340. W. Mu, S. Sun, J. Zhang, M. Jiao, W. Wang, Y. Liu, X. Sun, L. Jiang, B. Chen and T. Qi, *Org. Electron.*, 2018, **61**, 78-86.
341. W. Sun, C.-H. Wang, S.-F. Lv, J.-X. Jiang, X. Guo and F.-B. Zhang, *Org. Electron.*, 2020, **77**, 105548.
342. Y. G. Chen, H. K. Tian, D. H. Yan, Y. H. Geng and F. S. Wang, *Macromolecules*, 2011, **44**, 5178-5185.
343. C.-A. Tseng, J.-S. Wu, T.-Y. Lin, W.-S. Kao, C.-E. Wu, S.-L. Hsu, Y.-Y. Liao, C.-S. Hsu, H.-Y. Huang, Y.-Z. Hsieh and Y.-J. Cheng, *Chem. Asian J.*, 2012, **7**, 2102-2110.
344. J. E. Donaghey, R. S. Ashraf, Y. Kim, Z. G. Huang, C. B. Nielsen, W. Zhang, B. Schroeder, C. R. G. Grenier, C. T. Brown, P. D'Angelo, J. Smith, S. Watkins, K. Song, T. D. Anthopoulos, J. R. Durrant, C. K. Williams and I. McCulloch, *J. Mater. Chem.*, 2011, **21**, 18744-18752.
345. Y. Xie, T. Fujimoto, S. Dalglish, Y. Shuku, M. M. Matsushita and K. Awaga, *J. Mater. Chem. C*, 2013, **1**, 3467-3481.
346. X. J. Yang, X. L. Shi, N. Aratani, T. P. Goncalves, K. W. Huang, H. Yamada, C. Y. Chi and Q. Miao, *Chem. Sci.*, 2016, **7**, 6176-6181.
347. X. Yang, D. Liu and Q. Miao, *Angew. Chem. Int. Ed.*, 2014, **53**, 6786-6790.
348. W. Hong, Z. M. Wei, H. X. Xi, W. Xu, W. P. Hu, Q. R. Wang and D. B. Zhu, *J. Mater. Chem.*, 2008, **18**, 4814-4820.
349. Z. Wei, W. Hong, H. Geng, C. Wang, Y. Liu, R. Li, W. Xu, Z. Shuai, W. Hu, Q. Wang and D. Zhu, *Adv. Mater.*, 2010, **22**, 2458-2462.
350. S. Yang, D. Liu, X. Xu and Q. Miao, *Chem. Commun.*, 2015, **51**, 4275-4278.

351. K. Takagi, S.-y. Yamamoto, K. Tsukamoto, Y. Hirano, M. Hara, S. Nagano, Y. Ie and D. Takeuchi, *Chem.-Eur. J.*, 2018, **24**, 14137-14145.
352. P.-Y. Gu, J. Zhang, G. Long, Z. Wang and Q. Zhang, *J. Mater. Chem. C*, 2016, **4**, 3809-3814.
353. T. Lei, Y. Zhou, C. Y. Cheng, Y. Cao, Y. Peng, J. Bian and J. Pei, *Org. Lett.*, 2011, **13**, 2642-2645.
354. F. Ding, D. Xia, C. Ge, Z. Kang, Y. Yang, R. Fan, K. Lin and X. Gao, *J. Mater. Chem. C*, 2019, **7**, 14314-14319.
355. Y. Ie, M. Ueta, M. Nitani, N. Tohnai, M. Miyata, H. Tada and Y. Aso, *Chem. Mater.*, 2012, **24**, 3285-3293.
356. P. Gomez, S. Georgakopoulos, J. P. Ceron, I. da Silva, M. Mas-Montoya, J. Perez, A. Tarraga and D. Curiel, *J. Mater. Chem. C*, 2018, **6**, 3968-3975.
357. L. Yang, M. Li, J. Song, Y. Zhou, Z. Bo and H. Wang, *Adv. Funct. Mater.*, 2018, **28**, 1705927.
358. R. S. Ashraf, Z. Chen, D. S. Leem, H. Bronstein, W. Zhang, B. Schroeder, Y. Geerts, J. Smith, S. Watkins, T. D. Anthopoulos, H. Sirringhaus, J. C. de Mello, M. Heeney and I. McCulloch, *Chem. Mater.*, 2011, **23**, 768-770.
359. B. C. Schroeder, Z. Huang, R. S. Ashraf, J. Smith, P. D'Angelo, S. E. Watkins, T. D. Anthopoulos, J. R. Durrant and I. McCulloch, *Adv. Funct. Mater.*, 2012, **22**, 1663-1670.
360. J. Chen, X. Zhang, G. Wang, M. A. Uddin, Y. Tang, Y. Wang, Q. Liao, A. Facchetti, T. J. Marks and X. Guo, *J. Mater. Chem. C*, 2017, **5**, 9559-9569.
361. K. Feng, H. Guo, J. Wang, Y. Shi, Z. Wu, M. Su, X. Zhang, J. H. Son, H. Y. Woo and X. Guo, *J. Am. Chem. Soc.*, 2021, **143**, 1539-1552.
362. T. Yasuda, T. Goto, K. Fujita and T. Tsutsui, *Appl. Phys. Lett.*, 2004, **85**, 2098-2100.
